# Supplementary material
Source: PubMed Central journal article supplement (PMC4629195)
Supplement: ja5b09671_si_001.pdf [file ja5b09671_si_001.pdf]

# Catalytic Olefin Hydroamidation Enabled by Proton-Coupled Electron Transfer

David C. Miller, Gilbert J. Choi, Hudson S. Orbe, and Robert R. Knowles\*

*Department of Chemistry, Princeton University, Princeton, New Jersey 08544, United States*

Correspondence to: rknowles@princeton.edu

## Supporting Information

| <b>Table of Contents</b>                                   | <b>Page</b> |
|------------------------------------------------------------|-------------|
| General Information                                        | S2          |
| Synthesis and Characterization of Substrates               | S3          |
| Synthesis and Characterization of Products                 | S21         |
| <sup>1</sup> H and <sup>13</sup> C NMR Spectra of Products | S37         |
| Diastereomer Identification                                | S81         |
| Stern-Volmer Studies                                       | S88         |
| Computational Evaluation of Hydrogen Bonding               | S97         |
| References                                                 | S102        |

## General Information

Commercial reagents were purified prior to use following the guidelines of Perrin and Armarego.<sup>1</sup> All solvents were purified according to the method of Grubbs.<sup>2</sup> Organic solutions were concentrated under reduced pressure on a Büchi rotary evaporator. Chromatographic purification of products was accomplished by flash chromatography on Silicycle F60 silica gel or Sorbent Technologies neutral alumina according to the method of Still.<sup>3</sup> All reactions were carried out in well ventilated fume hoods. Thin-layer chromatography (TLC) was performed on Silicycle 250  $\mu\text{m}$  silica gel plates or Sorbent Technologies 250  $\mu\text{m}$  neutral alumina plates. Visualization of the developed chromatogram was performed by irradiation with UV light or treatment with a solution of potassium permanganate or ceric ammonium molybdate stain followed by heating. Yields refer to purified compounds unless otherwise noted.

$^1\text{H}$  and  $^{13}\text{C}$  NMR spectra were recorded on a Bruker 500 (500 and 126 MHz for  $^1\text{H}$  and  $^{13}\text{C}$  respectively) instrument, and are internally referenced to residual solvent signals,  $\text{CDCl}_3$  referenced at  $\delta$  7.26 and 77.16 ppm and  $\text{DMSO}-d_6$  referenced at  $\delta$  2.50 and 39.52 ppm.  $^{19}\text{F}$  NMR spectra were recorded on a Bruker AVANCE 300 (282 MHz) instrument and are referenced to  $\text{CFCl}_3$  at  $\delta$  0.0 ppm. For high temperature NMR data,  $^1\text{H}$  and  $^{13}\text{C}$  spectra were recorded on either a Bruker 500 (500 and 126 MHz for  $^1\text{H}$  and  $^{13}\text{C}$  respectively) or Bruker 300 (300 and 75 MHz for  $^1\text{H}$  and  $^{13}\text{C}$  respectively). Data for  $^1\text{H}$  is reported as follows: chemical shift ( $\delta$  ppm), integration, multiplicity (s = singlet, d = doublet, t = triplet, q = quartet, m = multiplet), broad peaks (br), coupling constant (Hz) and assignment. Data for  $^{13}\text{C}$  and  $^{19}\text{F}$  NMR are reported in terms of chemical shift, multiplicity (s = singlet, d = doublet, t = triplet, q = quartet, m = multiplet), coupling constant (Hz) and no special nomenclature is used for equivalent carbons. IR spectra were recorded on a Perkin Elmer Paragon 1000 spectrometer and are reported in terms of frequency of absorption ( $\text{cm}^{-1}$ ). High-resolution mass spectra were obtained at Princeton University mass spectrometry facilities using an Agilent 6210 TOF LC/MS.

## Synthesis and Characterization of Substrates

### General Procedures for Substrate Synthesis

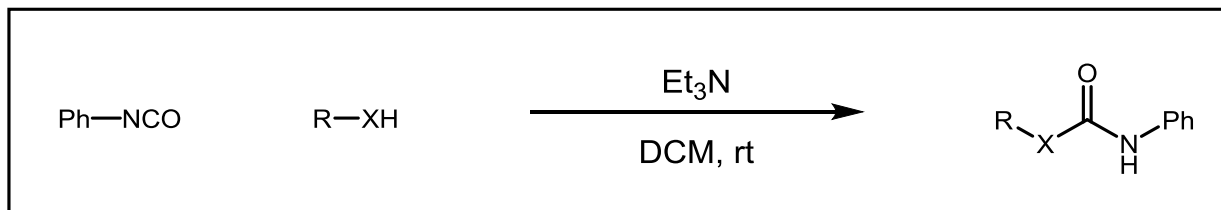

#### General Procedure A: Phenyl Carbamate/Urea Synthesis General Procedure

This protocol is used as reported using prior disclosed conditions.<sup>4</sup> A flame-dried round-bottomed flask was degassed, flushed with argon, and charged with phenyl isocyanate (10 mmol, 1 equiv), DCM (10 mL, 1.0 M),  $\text{Et}_3\text{N}$  (30 mmol, 3.0 equiv) and alcohol/amine (10 mmol, 1 equiv). The reaction mixture was stirred at room temperature until the alcohol/amine was fully consumed by TLC. The reaction mixture was then diluted with DCM (20 mL), washed with 1M HCl (3 x 20 mL), water (20 mL), and brine (20 mL), and then dried ( $\text{Na}_2\text{SO}_4$ ) and concentrated. The crude product was purified by either silica gel column chromatography or recrystallization to afford the desired product.

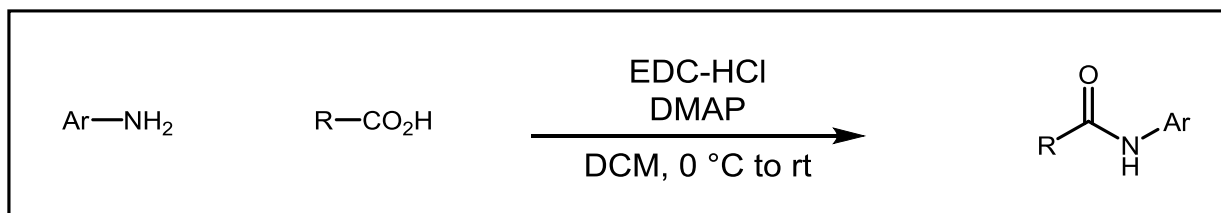

#### General Procedure B: Amide Synthesis General Procedure by Amide Coupling

This protocol is adapted from prior disclosed conditions.<sup>5</sup> A flame-dried round-bottomed flask was degassed, flushed with argon, and charged with DCM (25 mL, 0.4 M), EDC-HCl (1-(3-dimethylaminopropyl)-3-ethylcarbodiimide hydrochloride, 13 mmol, 1.3 equiv), and DMAP (14 mmol, 1.4 equiv). The reaction flask was cooled to zero degrees in an ice bath and the carboxylic acid (10 mmol, 1.0 equiv) was added. After five minutes of stirring, the substituted aniline (12 mmol, 1.2 equiv) was added. The ice bath was then removed and the reaction allowed to stir for 24 hours at RT or until starting material was consumed by TLC. The reaction was quenched with 1M HCl (25 mL) and the organics separated. The aqueous layer was then extracted with DCM (2 x 25 mL). The organic layers were combined and dried over  $\text{Na}_2\text{SO}_4$  and concentrated. The crude product was purified by either silica gel column chromatography or recrystallization to afford the desired product.

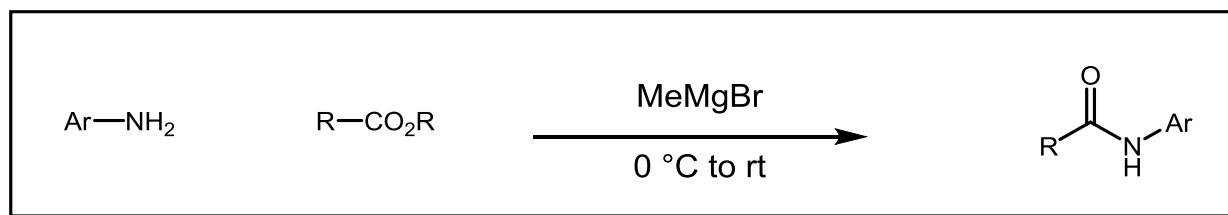

### General Procedure C: Amide Synthesis General Procedure by Substitution of Esters

This protocol is used as reported using prior disclosed conditions.<sup>6</sup> Three flame-dried round-bottomed flasks were flushed with argon and charged with Et<sub>2</sub>O (16 mL, total reaction concentration 0.1 M). The ester (5.26 mmol, 1 equiv) was added to one flask. The substituted aniline (10.51 mmol, 2 equiv) was added to a separated flask. Methylmagnesium bromide (3.0 M in Et<sub>2</sub>O, 10.5 mmol, 2 equiv) was added to the third flask. The aniline solution was added slowly to the methylmagnesium bromide solution. When evolution of gas ceased and the reaction subsided, the ester solution was added to the reaction flask. The reaction was let stir at room temperature for 2 hours. The reaction was quenched with 1 M HCl (50 mL) and diluted with EtOAc (50 mL). The organics were separated and the aqueous layer was extracted with EtOAc (3 x 25 mL). The combined organic layers were washed with brine (25 mL), dried over Na<sub>2</sub>SO<sub>4</sub>, and concentrated. The crude product was purified by either silica gel column chromatography or recrystallization to afford the desired product.

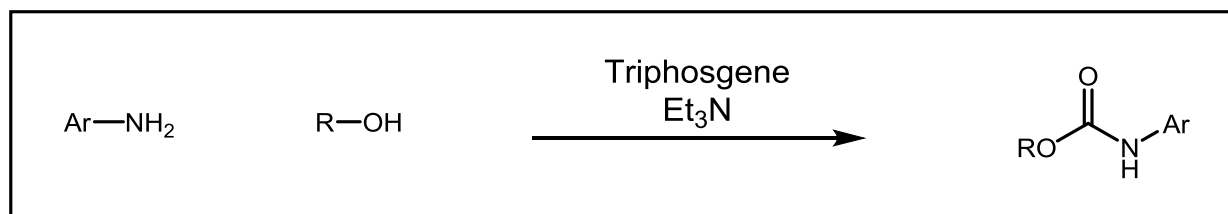

### General Procedure D: Carbamate Synthesis by Sequential Addition to Triphosgene

A flame dried round-bottomed flask was degassed, flushed with argon, and charged with triphosgene (1.49 g, 5.0 mmol) in THF (10 mL). Then, a solution of substituted aniline (5.0 mmol) dissolved in THF (40 mL) was slowly dripped into the triphosgene solution. NEt<sub>3</sub> (1.5 mL, 10.5 mmol) was then added slowly to the reaction mixture after the aniline was added. The reaction mixture was stirred at room temperature for 2 hours. The reaction mixture was then concentrated and the flask containing the resulting residue was degassed and acetonitrile (80 mL), NEt<sub>3</sub> (1.5 mL, 10.5 mmol), and alcohol were added (6.0 mmol). The reaction mixture was then stirred at 70 °C for 8 hours. The reaction mixture was concentrated and the crude residue was purified by alumina column chromatography (gradient 100% hexanes to 20% EtOAc/hexanes) to yield the pure aryl carbamate product.

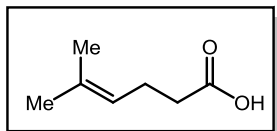

### 5-Methylhex-4-enoic acid

5-methylhex-4-enoic acid was synthesized as outlined by Shannon.<sup>7</sup> It is a common intermediate to a number of substrates in the table.

## Substrate Syntheses

Substrates are presented in the order their corresponding products appear in the substrate table.

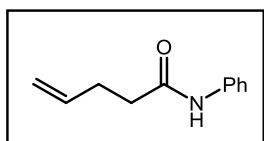

### N-Phenylpent-4-enamide (1)

Synthesized using General Procedure B starting from pent-4-enoic acid and aniline on a 40 mmol scale with respect to the carboxylic acid. The product was purified by recrystallization from a mixture of hexanes and ethyl acetate to yield 6.44 g (92% yield) of the title compound as white, glittery flakes. <sup>1</sup>H NMR (500 MHz, CDCl<sub>3</sub>) δ 7.51 (d, *J* = 8.0 Hz, 2H), 7.44 (br s, 1H), 7.30 (t, *J* = 7.8 Hz, 2H), 7.10 (t, *J* = 7.4 Hz, 1H), 5.88 (ddt, *J* = 16.7, 10.4, 6.0 Hz, 1H), 5.12 (d, *J* = 16.9 Hz, 1H), 5.05 (d, *J* = 10.1 Hz, 1H), 2.47 (h, *J* = 6.2 Hz, 4H). Spectral data in consistent with reported literature values.<sup>8</sup>

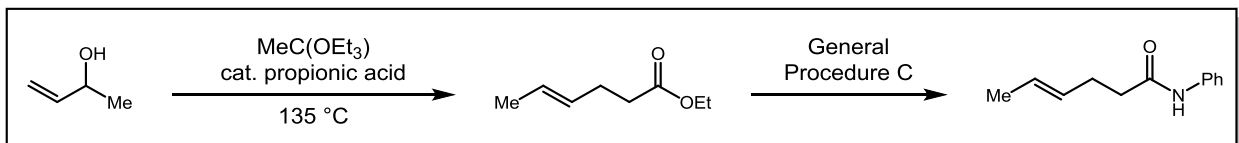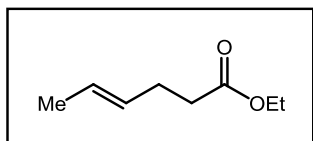

### Ethyl (*E*)-hex-4-enoate

Synthesized using a protocol modified from a literature prep.<sup>9</sup> Glassware is neither flame nor oven-dried prior to the reaction. To a distillation setup with one collection bulb under inert atmosphere, but-3-en-2-ol (5.05 g, 70 mmol, 1 equiv), triethyl orthoacetate (17.03 g, 105 mmol, 1.5 equiv), and propionic acid (0.14 g, 1.9 mmol, 0.03 equiv) were mixed together. The solution was heated to 120 degrees until ethanol distillation ceases. The distillation head was then replaced with a reflux condenser and the solution heated to vigorous reflux (135 degrees) for 6 hours. Upon cooling, volatiles are removed on the rotovap (60 torr, 35 degree water bath). The product was distilled to yield 4.80 g (48% yield) of the product as a colorless oil. <sup>1</sup>H NMR (500 MHz, CDCl<sub>3</sub>) δ 5.58 – 5.37 (m, 2H), 4.12 (q, *J* = 7.1 Hz, 2H), 2.38 – 2.26 (m, 4H), 1.64 (m, 3H), 1.25 (t, *J* = 7.1 Hz, 3H). Spectral data is consistent with the reported literature spectra.<sup>9</sup>

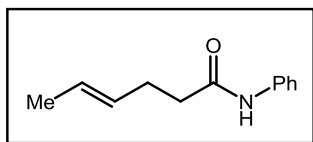

### (*E*)-N-Phenylhex-4-enamide

Synthesized using General Procedure C starting from Ethyl (*E*)-hex-4-enoate and aniline on a 5.63 mmol scale with respect to the ester. The product was purified by recrystallization from a mixture of hexanes and ethyl acetate to yield 777 mg (73% yield) of the title compound as a white solid. <sup>1</sup>H NMR (500 MHz, CDCl<sub>3</sub>) δ 7.50 (d, *J* = 8.0 Hz, 2H), 7.32 (t, *J* = 7.9 Hz, 2H), 7.21 (br s, 1H), 7.10 (t, *J* = 7.4 Hz, 1H), 5.64 – 5.41 (m, 2H), 2.50 – 2.34 (m, 4H), 1.67 (d, *J* = 6.0 Hz, 3H).

Spectral data in consistent with the reported literature spectra.<sup>10</sup>

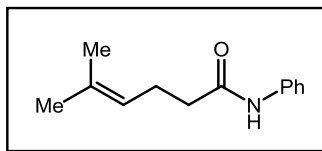

### 5-Methyl-N-phenylhex-4-enamide

Synthesized using General Procedure B starting from 5-methylhex-4-enoic acid and aniline on a 6.81 mmol scale with respect to the carboxylic acid. The product was purified by recrystallization from a mixture of hexanes and ethyl acetate to yield 770 mg (56% yield) of the title compound as a white solid. <sup>1</sup>H NMR (500 MHz, Chloroform-*d*) δ 7.49 (d, *J* = 8.0 Hz, 2H), 7.32 (t, *J* = 7.8 Hz, 2H), 7.17 (br s, 1H), 7.10 (t, *J* = 7.4 Hz, 1H), 5.18 (t, *J* = 6.6 Hz, 1H), 2.45 – 2.36 (m, 4H), 1.72 (s, 3H), 1.66 (s, 3H). Spectral data is consistent with the reported literature spectra.<sup>10</sup>

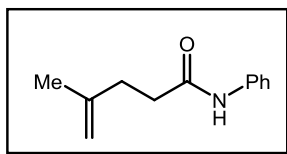

### 4-Methyl-N-phenylpent-4-enamide

Synthesized using General Procedure C starting from ethyl 4-methylpent-4-enoate and aniline on a 5.82 mmol scale with respect to the ester. The crude product is purified by recrystallization from a mixture of hexanes and ethyl acetate to yield 611 mg (56% yield) of the title compound as a white solid. <sup>1</sup>H NMR (500 MHz, CDCl<sub>3</sub>) δ 7.50 (d, *J* = 7.8 Hz, 2H), 7.31 (t, *J* = 7.9 Hz, 2H), 7.10 (t, *J* = 7.4 Hz, 1H), 4.81 (s, 1H), 4.77 (s, 1H), 2.57 – 2.39 (m, 4H), 1.79 (s, 3H). Spectral data is consistent with the reported literature spectra.<sup>11</sup>

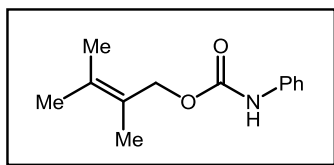

### 2,3-Dimethylbut-2-en-1-yl phenylcarbamate

Synthesized using General Procedure A from 2,3-dimethyl-2-buten-1-ol<sup>4</sup> on a 4.94 mmol scale with respect to the alcohol component. The crude product is purified by silica gel chromatography (gradient from 0% EtOAc in Hexanes to 10% EtOAc in Hexanes) to give 920 mg (85% yield) of the title compound. <sup>1</sup>H NMR (500 MHz, CDCl<sub>3</sub>) δ 7.38 (d, *J* = 8.0 Hz, 2H), 7.30 (t, *J* = 7.8 Hz, 2H), 7.05 (t, *J* = 7.4 Hz, 1H), 6.63 (s, 1H), 4.70 (s, 2H), 1.80 (s, 3H), 1.74 (d, *J* = 10.4 Hz, 6H). Spectral data is consistent with the reported literature spectra.<sup>4</sup>

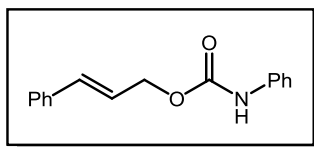

### Cinnamyl phenylcarbamate

Synthesized using General Procedure A starting with cinnamyl alcohol on a 8.12 mmol scale with respect to cinnamyl alcohol. The title compound was purified by recrystallization from a mixture of hexanes and ethyl acetate to furnish 1.27 g (62% yield) of the titled compound as a white solid. <sup>1</sup>H NMR (500 MHz, Chloroform-*d*) δ 7.44 – 7.29 (m, 9H), 7.10 – 7.03 (m, 1H), 6.70 (d, *J* = 15.9 Hz, 1H), 6.34 (dt, *J* = 15.9, 6.4 Hz, 1H), 4.83 (d, *J* = 6.5 Hz, 2H). Spectral data is consistent with the reported literature spectra.<sup>12</sup>

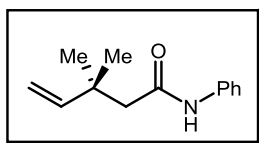

### 3,3-Dimethyl-N-phenylpent-4-enamide

Synthesized using General Procedure C starting from methyl 3,3-dimethylpent-4-enoate and aniline on a 5.90 mmol scale with respect to the ester. The product is purified by recrystallization from a mixture of hexanes and ethyl acetate to afford 770 mg (64% yield) of the title compound as a white solid.  $^1\text{H NMR}$  (500 MHz,  $\text{CDCl}_3$ )  $\delta$  7.46 (d,  $J = 7.6$  Hz, 2H), 7.31 (t,  $J = 7.8$  Hz, 2H), 7.23 (br s, 1H), 7.09 (t,  $J = 7.4$  Hz, 1H), 6.01 (dd,  $J = 17.8, 10.4$  Hz, 1H), 5.16 – 5.09 (m, 2H), 2.37 (s, 2H), 1.20 (s, 6H). Spectral data is consistent with the reported literature spectra.<sup>10</sup>

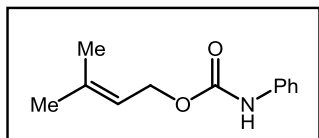

### 3-Methylbut-2-en-1-yl phenylcarbamate

Synthesized using General Procedure A starting from prenol on a 6.64 mmol scale with respect to prenol. The title compound was purified by silica gel column chromatography (gradient from 10% DCM in Hexanes to 33% DCM in Hexanes) followed by recrystallization from a solution of hexanes and ethyl acetate to yield 1.20 g (88% yield) of the title compound as a white solid.  $^1\text{H NMR}$  (500 MHz,  $\text{CDCl}_3$ )  $\delta$  7.37 (d,  $J = 8.0$  Hz, 2H), 7.30 (dd,  $J = 8.6, 7.2$  Hz, 2H), 7.05 (tt,  $J = 7.3, 1.2$  Hz, 1H), 6.57 (br s, 1H), 5.47 – 5.34 (m, 1H), 4.67 (d,  $J = 7.2$  Hz, 2H), 1.78 (s, 4H), 1.75 (s, 1H). Spectral data is consistent with the reported literature spectra.<sup>13</sup>

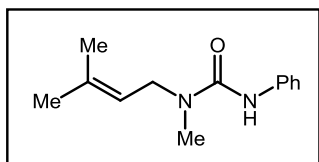

### Methyl-1-(3-methylbut-2-en-1-yl)-3-phenylurea

Synthesized using General Procedure A using N-methyl-N-(3-methyl-2-buten-1-yl)amine<sup>4</sup> on a 3.84 mmol scale with respect to the amide. The crude product is purified by silica gel column chromatography (gradient from 0% EtOAc in Hexanes to 33% EtOAc in Hexanes) to give 720 mg (86% yield) of the title compound as a white solid.  $^1\text{H NMR}$  (500 MHz,  $\text{CDCl}_3$ )  $\delta$  7.34 (d,  $J = 7.7$  Hz, 2H), 7.30 – 7.25 (m, 3H), 7.01 (t,  $J = 7.3$  Hz, 1H), 6.36 (s, 1H), 5.27 (t,  $J = 7.1$  Hz, 1H), 3.94 (d,  $J = 6.8$  Hz, 2H), 2.99 (s, 3H), 1.78 (d,  $J = 15.6$  Hz, 5H). Spectral data is consistent with the reported literature spectra.<sup>4</sup>

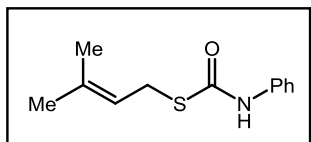

### S-(3-Methylbut-2-en-1-yl) phenylcarbamothioate

A flame dried round-bottomed flask was charged with dry, oil-free KH (672 mg, 16.75 mmol) inside a glove box. THF (20 mL) was added and the suspension was cooled to 0 °C. 2-methyl-3-buten-2-ol (1.75 mL, 16.75 mmol) was added and the reaction mixture was allowed to warm to room temperature and stirred for 30 minutes. Phenyl isothiocyanate (2 mL, 16.75 mmol) was then added and the reaction was stirred for 6 hours or until complete consumption of alcohol was seen by TLC. The reaction was quenched with sat.  $\text{NH}_4\text{Cl}$  solution and extracted with  $\text{Et}_2\text{O}$  three times. The combined organic layers were then washed with brine, dried with  $\text{Na}_2\text{SO}_4$ , and concentrated to yield the crude product, which was then purified by recrystallization from petroleum ether and ethyl acetate to give 1.2 g (44% yield) of the title compound.  $^1\text{H NMR}$  (500 MHz,  $\text{CDCl}_3$ )  $\delta$  7.41 (d,  $J = 8.0$  Hz, 2H), 7.31 (t,  $J = 7.8$  Hz, 2H), 7.11 (t,  $J = 7.4$  Hz, 1H), 7.06 (s, 1H), 5.30 (t,  $J = 8.0$  Hz, 1H), 3.64 (d,  $J = 7.8$  Hz, 2H), 1.72 (d,  $J = 8.7$  Hz, 6H). Spectral data is consistent with the reported literature spectra.<sup>4</sup>

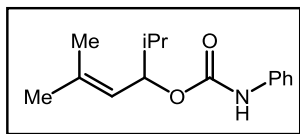

### 2,5-Dimethylhex-4-en-3-yl phenylcarbamate

Synthesized using General Procedure A using 2,5-dimethylhex-4-en-3-ol<sup>14</sup> on a 2.84 mmol scale with respect to the alcohol. The crude product is purified by silica gel column chromatography to give 550 mg (79% yield) of the title compound. IR (neat): 3319, 2964, 2932, 2874, 1698, 1600, 1529, 1501, 1442, 1382, 1312, 1220, 1047, 1026, 967, 949, 858, 752, 691 cm<sup>-1</sup>; <sup>1</sup>H NMR (500 MHz, CDCl<sub>3</sub>) δ 7.31 (d, *J* = 8.0 Hz, 2H), 7.25 – 7.20 (m, 2H), 6.99 – 6.94 (m, 1H), 6.46 (s, 1H), 5.20 (dd, *J* = 9.5, 6.8 Hz, 1H), 5.08 (dp, *J* = 9.4, 1.4 Hz, 1H), 1.81 (h, *J* = 6.8 Hz, 1H), 1.69 (dd, *J* = 8.9, 1.4 Hz, 6H), 0.86 (dd, *J* = 20.0, 6.8 Hz, 6H).; <sup>13</sup>C NMR (126 MHz, CDCl<sub>3</sub>) δ 153.45, 138.32, 138.07, 129.13, 123.26, 122.09, 118.63, 32.87, 26.09, 18.78, 18.50, 18.06.; HRMS (ESI) exact mass calculated for [M+Na]<sup>+</sup> (C<sub>15</sub>H<sub>21</sub>NO<sub>2</sub>) requires *m/z* 247.15723, found *m/z* 247.15752, difference 1.17 ppm.

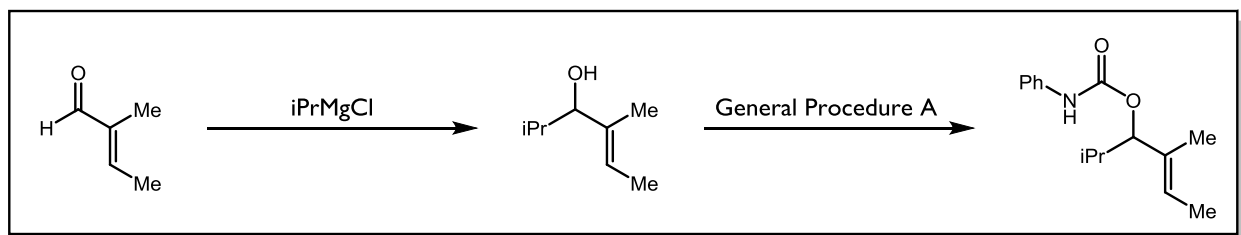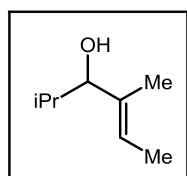

#### (*E*)-2,4-Dimethylhex-4-en-3-ol

To a solution of tiglic aldehyde (1.3 g, 15.5 mmol) in diethyl ether (31 mL) at 0 °C was added a solution of isopropylmagnesium chloride in diethyl ether (10.9 mL, 2 M, 21.7 mmol). The reaction mixture was stirred for 2 h at 0 °C and then sat. NH<sub>4</sub>Cl was added. The mixture was extracted with diethyl ether 3 times, and the organic layer was washed with water and brine, dried over sodium sulfate, and concentrated. The crude product was purified by column chromatography to afford 1.8 g (90% yield) of the pure alcohol. IR (neat): 3382, 2956, 2921, 2870, 1460, 1380, 1296, 1249, 1169, 1124, 1080, 1007, 971, 955, 914, 854, 818 cm<sup>-1</sup>; <sup>1</sup>H NMR (500 MHz, CDCl<sub>3</sub>) δ 5.43 (q, *J* = 6.7 Hz, 1H), 3.57 (d, *J* = 8.3 Hz, 1H), 1.80 – 1.71 (m, 1H), 1.61 (d, *J* = 6.8 Hz, 3H), 1.58 (s, 3H), 0.98 (d, *J* = 6.6 Hz, 3H), 0.76 (d, *J* = 6.8 Hz, 3H).; <sup>13</sup>C NMR (126 MHz, CDCl<sub>3</sub>) δ 137.38, 121.94, 84.39, 31.26, 19.55, 18.85, 14.27, 13.14.; MS (ESI) exact mass calculated for [M]<sup>+</sup> (C<sub>8</sub>H<sub>16</sub>O) requires *m/z* 128.1, found *m/z* 128.1.

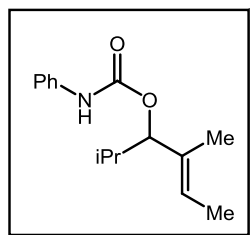

#### (*E*)-2,4-Dimethylhex-4-en-3-yl phenylcarbamate

Synthesized using General Procedure A using (*E*)-2,4-dimethylhex-4-en-3-ol on a 10.4 mmol scale with respect to the alcohol component. The crude product is purified by silica gel column chromatography to give 2.10 g (82% yield) of the title compound. IR (neat): 3315, 2962, 2927, 2873, 1699, 1600, 1534, 1501, 1442, 1383, 1327, 1311, 1222, 1178, 1082, 1048, 1027, 997, 966, 950, 823, 753, 692 cm<sup>-1</sup>; <sup>1</sup>H NMR (500 MHz, CDCl<sub>3</sub>) δ 7.39 (d, *J* = 9.2 Hz, 2H), 7.29 (t, *J* = 8.2 Hz, 2H), 7.07 – 7.00 (m, 1H), 5.56 (q, *J* = 7.2 Hz, 1H), 4.79 (d, *J* = 9.4 Hz, 1H), 2.01 – 1.89 (m, 1H), 1.63 (s, 3H), 1.61 (s, 3H), 0.97 (d, *J* = 6.8 Hz, 3H), 0.83 (d, *J* = 7.1 Hz, 3H).; <sup>13</sup>C NMR (126 MHz, CDCl<sub>3</sub>) δ 153.36, 138.29, 133.09, 129.14, 124.19, 123.28, 86.24, 30.07, 19.18, 18.89, 13.23, 11.68.; HRMS (ESI) exact mass calculated for [M+H]<sup>+</sup> (C<sub>15</sub>H<sub>21</sub>NO<sub>2</sub>) requires *m/z* 247.15723, found *m/z* 247.15763, difference 1.62 ppm.



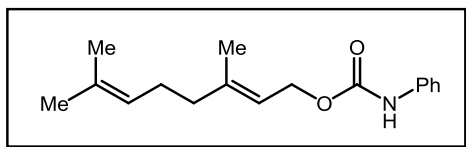

### (E)-3,7-Dimethylocta-2,6-dien-1-yl phenylcarbamate

Synthesized using General Procedure A starting with geraniol on a 11.0 mmol scale with respect to geraniol.

The title compound was purified by silica gel chromatography (gradient from 0% EtOAc in Hexanes to 5% EtOAc in Hexanes) to yield 1.8 g (60% yield) of the title compound as a clear oil. IR (neat) 3323, 2968, 2921, 1706, 1601, 1537, 1501, 1444, 1378, 1313, 1221, 1082, 1053, 1028, 754, 692  $\text{cm}^{-1}$ ;  $^1\text{H}$  NMR (500 MHz,  $\text{CDCl}_3$ )  $\delta$  7.38 (d,  $J = 8.0$  Hz, 2H), 7.34 – 7.26 (m, 2H), 7.09 – 7.01 (m, 1H), 6.61 (br s, 1H), 5.42 – 5.37 (m, 1H), 5.09 (ddt,  $J = 7.0, 5.4, 1.5$  Hz, 1H), 4.69 (d,  $J = 7.2$  Hz, 2H), 2.15 – 2.04 (m, 4H), 1.74 (s, 3H), 1.69 (s, 3H), 1.61 (s, 3H);  $^{13}\text{C}$  NMR (126 MHz,  $\text{CDCl}_3$ )  $\delta$  153.72, 142.75, 138.09, 132.02, 129.17, 123.84, 123.46, 118.72, 118.47, 62.15, 39.69, 26.44, 25.83, 17.84, 16.66; HRMS (ESI) exact mass calculated for  $[\text{M}+\text{Na}]^+$  ( $\text{C}_{17}\text{H}_{23}\text{NO}_2$ ) requires  $m/z$  273.17288, found  $m/z$  273.17302 difference 0.53 ppm.

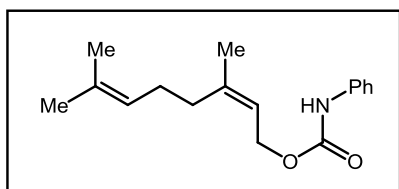

### (Z)-3,7-Dimethylocta-2,6-dien-1-yl phenylcarbamate

Synthesized using General Procedure A starting with nerol on a 7.32 mmol scale with respect to nerol. The title compound was purified by silica gel chromatography (gradient from 0% EtOAc in Hexanes to 8% EtOAc in Hexanes) to yield 676 mg

(34% yield) of the title compound as a colorless oil. IR (neat) 3322, 2969, 2924, 1706, 1601, 1537, 1501, 1444, 1378, 1313, 1220, 1084, 1055, 1027, 753, 692  $\text{cm}^{-1}$ ;  $^1\text{H}$  NMR (500 MHz,  $\text{CDCl}_3$ )  $\delta$  7.37 (d,  $J = 8.0$  Hz, 2H), 7.30 (dd,  $J = 8.6, 7.2$  Hz, 2H), 7.09 – 7.02 (m, 1H), 6.57 (br s, 1H), 5.41 (td,  $J = 7.3, 1.7$  Hz, 1H), 5.13 – 5.08 (m, 1H), 4.66 (d,  $J = 6.7$  Hz, 2H), 2.19 – 2.05 (m, 4H), 1.79 (s, 3H), 1.69 (s, 3H), 1.61 (s, 3H);  $^{13}\text{C}$  NMR (126 MHz,  $\text{CDCl}_3$ )  $\delta$  153.66, 143.04, 138.07, 132.38, 129.18, 123.68, 123.47, 119.38, 118.69, 61.89, 32.34, 26.83, 25.86, 23.70, 17.83; HRMS (ESI) exact mass calculated for  $[\text{M}+\text{Na}]^+$  ( $\text{C}_{17}\text{H}_{23}\text{NO}_2$ ) requires  $m/z$  273.17288, found  $m/z$  273.17244 difference 1.6 ppm.

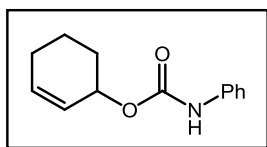

### Cyclohex-2-en-1-yl phenylcarbamate

Synthesized using General Procedure A starting with 2-cyclohexen-1-ol on a 10.0 mmol scale with respect to the alcohol component. The title compound was purified by recrystallization from a mixture of hexanes and ethyl acetate to furnish 1.56 g (72% yield) of the title compound as a white solid.  $^1\text{H}$  NMR (500 MHz,  $\text{CDCl}_3$ )  $\delta$  7.38 (d,  $J = 8.5$  Hz, 2H), 7.30 (t,  $J = 7.8$  Hz, 2H), 7.07 – 7.03 (m, 1H), 6.56 (br s, 1H), 5.99 (dt,  $J = 10.4, 3.9$  Hz, 1H), 5.79 (dd,  $J = 10.2, 3.2$  Hz, 1H), 5.28 (d,  $J = 5.0$  Hz, 1H), 2.17 – 1.88 (m, 3H), 1.85 – 1.62 (m, 3H). Spectral data is consistent with the reported literature spectra.<sup>10</sup>

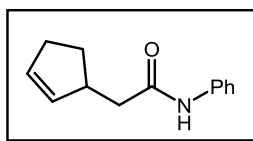

### 2-(Cyclopent-2-en-1-yl)-N-phenylacetamide

Synthesized using General Procedure B starting with 2-(cyclopent-2-en-1-yl)acetic acid and aniline on a 5.57 mmol scale with respect to the

carboxylic acid. The title compound was purified by recrystallization from a mixture of hexanes and ethyl acetate to afford 878 mg (78% yield) of the title compound as a white solid.  $^1\text{H}$  NMR (500 MHz,  $\text{CDCl}_3$ )  $\delta$  7.51 (d,  $J = 8.0$  Hz, 2H), 7.32 (t,  $J = 7.9$  Hz, 2H), 7.11 (d,  $J = 7.7$  Hz, 1H), 5.78 (m, 1H), 3.29 – 3.15 (m, 1H), 2.45 – 2.32 (m, 4H), 2.20 (m, 1H), 1.58 – 1.49 (m, 1H). Spectral data is consistent with the reported literature spectra.<sup>15</sup>

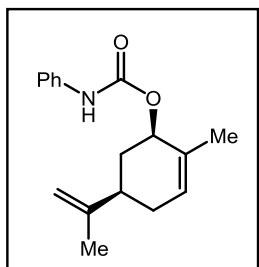

**(1R,5R)-2-Methyl-5-(prop-1-en-2-yl)cyclohex-2-en-1-yl phenylcarbamate**

Synthesized using General Procedure A starting with (-)-cis-carveol<sup>16</sup> on a 5.14 mmol scale with respect to the alcohol. The title compound was purified by silica gel column chromatography to yield 1.2 g (86% yield) of the title compound. IR (neat): 3319, 2967, 2918, 1695, 1645, 1600, 1532, 1501, 1442, 1374, 1312, 1217, 1179, 1157, 1087, 1048, 1026, 999, 968, 890, 816, 752, 691  $\text{cm}^{-1}$ ;  $^1\text{H}$  NMR (500 MHz,  $\text{CDCl}_3$ )  $\delta$  7.40 (d,  $J = 7.9$  Hz, 2H), 7.31 (t,  $J = 7.8$  Hz, 2H), 7.07 (t,  $J = 7.4$  Hz, 1H), 6.67 (s, 1H), 5.62 (d,  $J = 5.1$  Hz, 1H), 5.46 (t,  $J = 8.4$  Hz, 1H), 4.73 (d,  $J = 5.9$  Hz, 2H), 2.40 – 2.26 (m, 2H), 2.16 – 2.06 (m, 1H), 2.03 – 1.92 (m, 1H), 1.73 (s, 3H), 1.71 (s, 3H), 1.56 (q,  $J = 11.6$  Hz, 1H).;  $^{13}\text{C}$  NMR (126 MHz,  $\text{CDCl}_3$ )  $\delta$  153.63, 148.38, 138.07, 133.20, 129.19, 126.08, 123.50, 118.65, 109.47, 74.31, 40.40, 34.49, 30.89, 20.68, 19.01.; HRMS (ESI) exact mass calculated for  $[\text{M}+\text{Na}]^+$  ( $\text{C}_{17}\text{H}_{21}\text{NO}_2$ ) requires  $m/z$  271.15723, found  $m/z$  271.15674, difference 1.8 ppm.

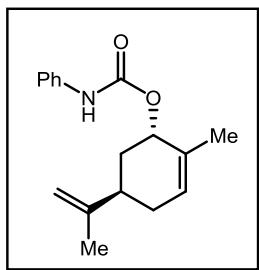

**(1R,5S)-2-Methyl-5-(prop-1-en-2-yl)cyclohex-2-en-1-yl phenylcarbamate**

Synthesized using General Procedure A starting with (+)-trans-carveol<sup>17</sup> on a 4.05 mmol scale with respect to the alcohol. The crude compound was purified by silica gel column chromatography to give 880 mg (80% yield) of the title compound. IR (neat): 3322, 2966, 2916, 1697, 1644, 1600, 1529, 1501, 1442, 1375, 1312, 1216, 1168, 1156, 1082, 1043, 1026, 997, 962, 937, 922, 889, 811, 753, 691  $\text{cm}^{-1}$ ;  $^1\text{H}$  NMR (500 MHz,  $\text{CDCl}_3$ )  $\delta$  7.40 (d,  $J = 8.0$  Hz, 2H), 7.34 – 7.28 (m, 2H), 7.09 – 7.03 (m, 1H), 6.62 (s, 1H), 5.79 – 5.73 (m, 1H), 5.29 – 5.23 (m, 1H), 4.79 – 4.70 (m, 2H), 2.38 – 2.30 (m, 1H), 2.26 – 2.18 (m, 1H), 2.12 – 2.06 (m, 1H), 1.89 (dddd,  $J = 17.9, 11.4, 4.3, 2.3$  Hz, 1H), 1.76 (d,  $J = 2.4$  Hz, 3H), 1.74 (s, 3H), 1.73 – 1.65 (m, 1H).;  $^{13}\text{C}$  NMR (126 MHz,  $\text{CDCl}_3$ )  $\delta$  153.51, 148.79, 138.11, 131.15, 129.20, 128.10, 123.45, 118.58, 109.45, 71.76, 35.96, 33.94, 31.06, 21.00, 20.84.; HRMS (ESI) exact mass calculated for  $[\text{M}+\text{Na}]^+$  ( $\text{C}_{17}\text{H}_{21}\text{NO}_2$ ) requires  $m/z$  271.15723, found  $m/z$  271.15749, difference 0.98 ppm.

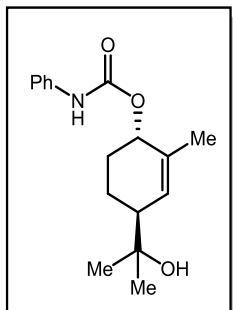

**4-(2-Hydroxypropan-2-yl)-2-methylcyclohex-2-en-1-yl phenyl carbamate**

Synthesized using General Procedure A starting from *trans*-sobrerol on a 7.05 mmol scale with respect to the alcohol component. The product is purified by silica gel column chromatography (gradient from 0% EtOAc in Hexanes to 25% EtOAc in Hexanes) to afford 690 mg (34% yield) of the title compound as a white solid. IR (neat) 3316, 2970, 1701, 1602, 1539, 1502, 1444, 1383, 1314, 1226, 1163, 1083, 1044, 1029, 998, 926, 880, 810, 754, 734, 693;  $^1\text{H}$  NMR (500 MHz,  $\text{CDCl}_3$ )  $\delta$  7.39 (d,  $J = 8.0$  Hz, 2H), 7.31

(dd,  $J = 8.7, 7.3$  Hz, 2H), 7.06 (t,  $J = 7.3$ , 1H), 6.61 (br s, 1H), 5.77 – 5.72 (m, 1H), 5.27 (m, 1H), 2.17 (m, 2H), 1.89 – 1.79 (m, 1H), 1.78 – 1.70 (m, 1H), 1.76 (obscured s, 3H), 1.54 – 1.46 (m, 1H), 1.21 (s, 3H), 1.18 (s, 3H);  $^{13}\text{C}$  NMR (126 MHz,  $\text{CDCl}_3$ )  $\delta$  153.52, 138.13, 131.19, 129.22, 128.07, 123.45, 118.55, 72.23, 71.84, 39.57, 30.22, 27.69, 27.03, 26.80, 20.83; HRMS (ESI) exact mass calculated for  $[\text{M}+\text{Na}]^+$  ( $\text{C}_{17}\text{H}_{23}\text{NO}_3$ ) requires  $m/z$  289.16779, found  $m/z$  289.16783 difference 0.13 ppm.

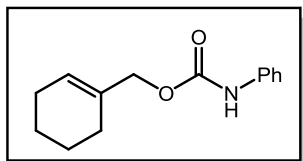

### Cyclohex-1-en-ylmethyl phenylcarbamate

Synthesized using General Procedure A starting with hydroxymethylcyclohexene<sup>11</sup> on a 6.69 mmol scale with respect to the alcohol. The product is purified by silica gel column chromatography to give 1.3 g (84% yield) of the title compound. Spectra are consistent with reported literature values.<sup>18</sup>

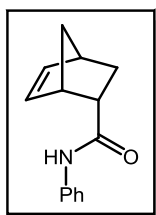

### Endo-*N*-phenylbicyclo[2.2.1]hept-5-ene-2-carboxamide

Synthesized using General Procedure B starting with racemic 5-norbornene-2-carboxylic acid (ca. 2:1 endo/exo) and aniline on a 5.73 mmol scale with respect to the carboxylic acid. The shown diastereomer of the title compound can be purified by silica gel column chromatography (gradient from 0% EtOAc in Hexanes to 10% EtOAc in Hexanes) to yield 644 mg (53% yield) of the title compound as a white solid. A stereochemical assignment can be made based on the similarity of the coupling constants to the corresponding methyl ester of said compound.<sup>19</sup> IR (neat) 3276, 3187, 3059, 2973, 2940, 2867, 1658, 1597, 1535, 1501, 1489, 1442, 1391, 1337, 1308, 1246, 1196, 1157, 1134, 1029, 991, 929, 905, 874, 843, 920, 754, 697  $\text{cm}^{-1}$ ;  $^1\text{H}$  NMR (500 MHz,  $\text{CDCl}_3$ )  $\delta$  7.48 (d,  $J = 7.0$  Hz, 2H), 7.30 (dd,  $J = 8.5, 7.2$  Hz, 2H), 7.08 (br m, 2H), 6.31 (dd,  $J = 5.7, 3.1$  Hz, 1H), 6.06 (dd,  $J = 5.7, 2.8$  Hz, 1H), 3.24 (s, 1H), 3.03 (dt,  $J = 9.3, 4.0$  Hz, 1H), 2.99 (s, 1H), 2.03 (ddd,  $J = 12.7, 9.4, 3.7$  Hz, 1H), 1.50 (m, 2H), 1.37 (d,  $J = 8.2$  Hz, 1H);  $^{13}\text{C}$  NMR (126 MHz,  $\text{CDCl}_3$ )  $\delta$  172.59, 138.23, 138.18, 132.21, 129.11, 124.11, 119.70, 50.34, 46.67, 46.12, 43.01, 30.17; HRMS (ESI) exact mass calculated for  $[\text{M}+\text{H}]^+$  ( $\text{C}_{14}\text{H}_{15}\text{NO}$ ) requires  $m/z$  213.11536, found  $m/z$  213.11567 difference 1.45 ppm.

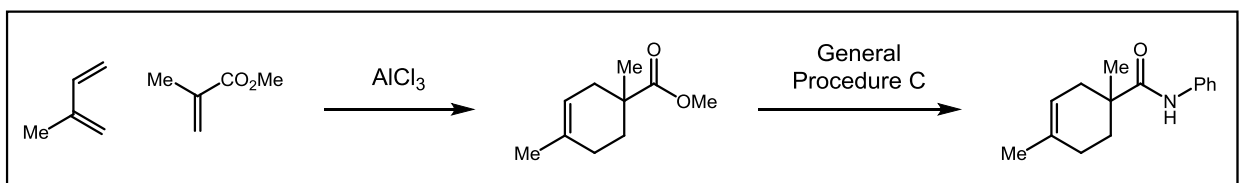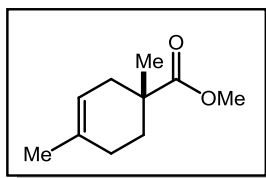

### Methyl 1,4-dimethylcyclohex-3-ene-1-carboxylate

Synthesized as outlined by Fukumoto.<sup>20</sup> To a flame-dried roundbottom under inert atmosphere:  $\text{AlCl}_3$  (500 mg, 3.75 mmol, 0.09 equiv) is suspended in benzene (25 mL, 1.60 M). Methyl methacrylate (4.00 g, 40 mmol, 1 equiv) was added dropwise. Afterwards, isoprene was added dropwise while cooling the flask in a water bath. The reaction was allowed to stir for fourteen

hours. To quench, 5 mL of concentrated HCl was added to ca. 30 mL of ice and the reaction mixture poured over the ice, rinsing the flask with ethyl acetate. When the ice melts, the aqueous layer was separated and the organic layer was washed with 1M HCl (1 x 30 mL) and brine (1 x 30 mL) prior to drying over Na<sub>2</sub>SO<sub>4</sub>. Solvent is removed on the rotovap to yield 5.20 g (77% yield) of the title compound as a colorless oil. The crude product is carried forward without purification. <sup>1</sup>H NMR (500 MHz, CDCl<sub>3</sub>) δ 5.22 (m, 1H), 3.56 (s, 3H), 2.44 – 2.34 (m, 1H), 1.91 – 1.72 (m, 4H), 1.53 (s, 3H) 1.50 – 1.43 (m, 1H), 1.08 (s, 3H). Spectral data is consistent with the reported literature spectra.<sup>21</sup>

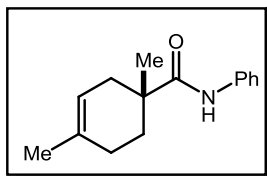

#### 1,4-Dimethyl-N-phenylcyclohex-3-ene-1-carboxamide

Synthesized using General Procedure C starting with methyl 1,4-dimethylcyclohex-3-ene-1-carboxylate and aniline on a 6.00 mmol scale with respect to the ester. The crude product was purified by recrystallization from a mixture of hexanes and ethyl acetate to afford 817 (59% yield) of the title compound as a white solid. IR (neat) 3312, 3016, 2966, 2918, 1650, 1598, 1532, 1503, 1490, 1436, 1381, 1315, 1245, 1160, 1116, 1062, 1030, 960, 903, 807, 789, 753, 733, 710, 694 cm<sup>-1</sup>; <sup>1</sup>H NMR (500 MHz, CDCl<sub>3</sub>) δ 7.58 (br s, 1H), 7.48 (d, *J* = 7.5 Hz, 2H), 7.31 (dd, *J* = 8.5, 7.3 Hz, 2H), 7.09 (t, *J* = 7.4 Hz, 1H), 5.51 – 5.44 (m, 1H), 2.55 – 2.47 (m, 1H), 2.14 – 1.97 (m, 4H), 1.71 (s, 3H), 1.70 – 1.63 (m, 1H), 1.30 (s, 3H); <sup>13</sup>C NMR (126 MHz, CDCl<sub>3</sub>) 175.97, 138.24, 135.45, 129.09, 124.23, 120.03, 118.89, 41.46, 34.97, 32.88, 27.98, 25.37, 23.54; HRMS (ESI) exact mass calculated for [M+H]<sup>+</sup> (C<sub>15</sub>H<sub>19</sub>NO) requires *m/z* 229.14666, found *m/z* 229.14680 difference 0.61 ppm.

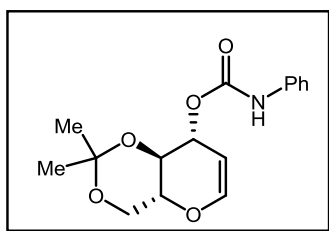

#### (4aR, 8R, 8aS)-2,2-Dimethyl-4,4a,8,8a-tetrahydropyrano[3,2-d][1,3]dioxin-8-ylphenylcarbamate

Synthesized using General Procedure A with commercially available 4,6-O-isopropylidene-D-glucal on a 5.46 mmol scale with respect to the glucal component. The crude compound is purified by silica gel column chromatography to give 1.2 g (72% yield) of the title compound. IR (neat): 3325, 2994, 2894, 1729, 1640, 1601, 1537, 1501, 1444, 1378, 1313, 1269, 1217, 1168, 1111, 1091, 1052, 1015, 869, 753, 692 cm<sup>-1</sup>; <sup>1</sup>H NMR (500 MHz, CDCl<sub>3</sub>) δ 7.37 (d, *J* = 8.1 Hz, 2H), 7.30 (t, *J* = 7.9 Hz, 2H), 7.06 (t, *J* = 7.4 Hz, 1H), 6.75 (s, 1H), 6.37 (d, *J* = 6.1 Hz, 1H), 5.38 (d, *J* = 7.8 Hz, 1H), 4.89 (dd, *J* = 6.3, 2.2 Hz, 1H), 4.11 – 4.04 (m, 1H), 4.04 – 3.95 (m, 1H), 3.92 – 3.81 (m, 2H), 1.55 (s, 3H), 1.44 (s, 3H); <sup>13</sup>C NMR (126 MHz, CDCl<sub>3</sub>) δ 152.99, 145.37, 137.82, 129.17, 123.63, 118.70, 101.39, 100.06, 70.42, 69.91, 61.67, 29.06, 19.10.; HRMS (ESI) exact mass calculated for [M+H]<sup>+</sup> (C<sub>16</sub>H<sub>19</sub>NO<sub>5</sub>) requires *m/z* 305.12632, found *m/z* 305.12692, difference 1.96 ppm.

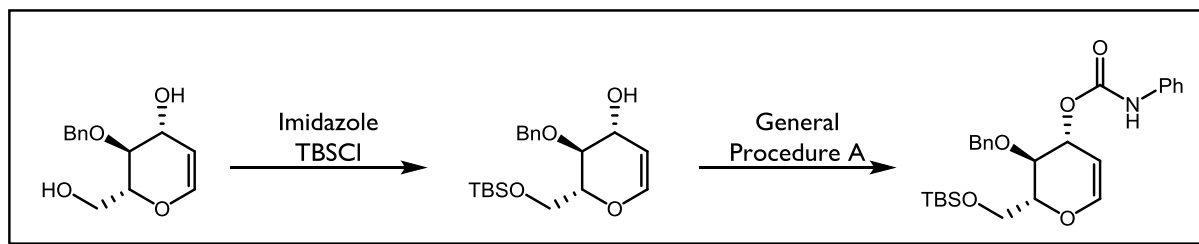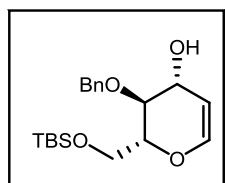

#### 4-O-Benzyl-6-O-tert-butyl dimethylsilyl-D-(-)-glucal

To a solution of commercially available 4-O-benzyl-D-glucal (1.1 g, 4.7 mmol) and imidazole (730 mg, 10.8 mmol) in DMF (4 mL) at 0 °C was added a solution of *tert*-butylchlorodimethylsilane (740 mg, 4.9 mmol) in DMF (2 mL). The reaction mixture was stirred for 6 h at 0 °C and then phosphate buffer (pH = 7) was added. The mixture was extracted with diethyl ether, and the organic layer was washed with water and brine, dried over sodium sulfate, and concentrated. The crude product was purified by column chromatography to afford 1.1 g (67% yield) of the pure product. Spectra are consistent with reported literature values.<sup>22</sup>

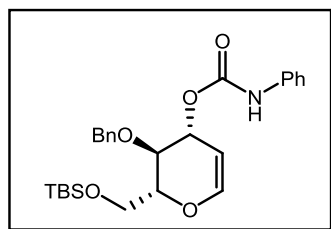

#### 4-O-Benzyl-6-O-tert-butyl dimethylsilyl-D-(-)-glucal phenyl carbamate

Synthesized using General Procedure A with 4-O-Benzyl-6-O-tert-butyl dimethylsilyl-D-(-)-glucal on a 2.49 mmol scale with respect to the glucal component. The crude compound is purified by silica gel column chromatography to give 0.9 g (77% yield) of the title compound. IR (neat): 3331, 2952, 2928, 2883, 2856, 1711, 1650, 1601, 1526, 1501, 1443, 1388, 1360, 1312, 1212, 1149, 1103, 1051, 1028, 937, 883, 835, 813, 776, 748, 693, 674 cm<sup>-1</sup>; <sup>1</sup>H NMR (500 MHz, CDCl<sub>3</sub>) δ 7.27 – 7.16 (m, 9H), 6.98 (t, *J* = 7.3 Hz, 1H), 6.32 (d, *J* = 6.0 Hz, 1H), 6.24 (s, 1H), 5.32 (d, *J* = 3.9 Hz, 1H), 4.71 (dd, *J* = 6.3, 2.7 Hz, 1H), 4.66 (s, 2H), 3.94 – 3.78 (m, 4H), 0.83 (s, 9H), 0.00 (s, 6H); <sup>13</sup>C NMR (126 MHz, CDCl<sub>3</sub>) δ 152.93, 145.92, 138.44, 137.83, 129.19, 128.49, 128.39, 127.83, 123.59, 118.62, 99.33, 78.27, 73.76, 72.95, 71.81, 61.39, 26.04, 18.48, -4.98, -5.21; HRMS (ESI) exact mass calculated for [M+Na]<sup>+</sup> (C<sub>26</sub>H<sub>35</sub>NO<sub>5</sub>Si) requires *m/z* 469.22845, found *m/z* 469.22803, difference 0.9 ppm.

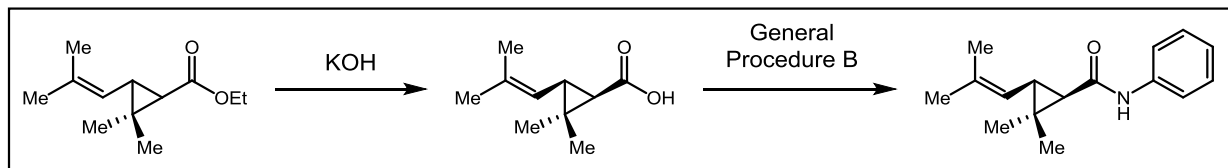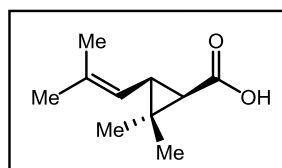

#### *cis*-Chrysanthemic acid

To a roundbottom flask equipped with a reflux condenser open to air with no precautions against moisture, ethyl chrysanthemate (ca. 1.6:1 trans/cis as provided by Sigma Aldrich; 27.2 g, 138 mmol, 1 equiv) and KOH (12.0 g, 215 mmol, 1.55 equiv) were dissolved in ethanol (120 mL, 1.15 M). The resultant solution was brought to reflux and allowed to stir for four hours. Upon cooling, the reaction was stripped of ethanol. The resulting residue was dissolved in 100 mL water and extracted with ether (3 x 50 mL). Afterwards, the aqueous layer was acidified with concentrated HCl to pH = 1 and extracted three times with DCM (3 x 50 mL). The combined organics are dried over Na<sub>2</sub>SO<sub>4</sub> and are concentrated to yield a crude mixture of the *cis* and *trans* chrysanthemic acid. The residue was brought up in ethyl acetate (ca. 1 mL per gram of raw material) and stored in the freezer until crystallization deposited 4.8 g of crystals with 2.5:1 *cis:trans* isomer ratio. The solid was continually recrystallized until 1.66 g (7% yield) of pure *cis*-Chrysanthemic acid was isolated. <sup>1</sup>H NMR (500 MHz, CDCl<sub>3</sub>) δ 5.35 (dp, *J* = 8.6, 1.5 Hz, 1H), 1.96 (t, *J* = 8.6 Hz, 1H), 1.75 (s, 3H), 1.70 (d, *J* = 1.4 Hz, 3H), 1.65 (d, *J* = 8.7 Hz, 1H), 1.25 (s, 3H), 1.21 (s, 3H). Spectral data is consistent with the reported literature spectra.<sup>23</sup>

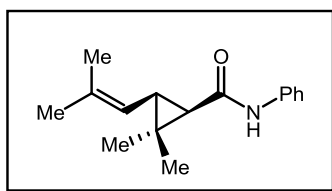

#### *cis*-*N*-Phenyl chrysanthemamide

Synthesized using General Procedure B using *cis*-chrysanthemic acid and aniline on a 8.92 mmol scale with respect to the carboxylic acid. The crude product was purified by recrystallization from a mixture of hexanes and ethyl acetate to yield 1.84 g (85% yield) of

the title compound as a white solid in >20:1 d.r. Peaks and splitting patterns are identical to that of the corresponding carboxylic acid, indicative of the *cis* geometry of the amide and prenyl groups. IR (neat) 3300, 3058, 2920, 1657, 1599, 1538, 1499, 1441, 1416, 1386, 1375, 1306, 1250, 1193, 1146, 1120, 1074, 1058, 981, 899, 857, 751, 692 cm<sup>-1</sup>; <sup>1</sup>H NMR (500 MHz, CDCl<sub>3</sub>) δ 7.45 (d, *J* = 7.9 Hz, 2H), 7.41 – 7.36 (br s, 1H), 7.29 (dd, *J* = 8.5, 7.3 Hz, 2H), 7.06 (t, *J* = 7.5 Hz, 1H), 5.47 – 5.41 (m, 1H), 1.82 (s, 3H), 1.76 (s, 3H), 1.58 (d, *J* = 8.7 Hz, 1H), 1.25 (d, *J* = 8.5 Hz, 6H); <sup>13</sup>C NMR (126 MHz, CDCl<sub>3</sub>) δ 169.06, 138.30, 136.48, 129.07, 123.93, 119.63, 118.67, 34.36, 30.62, 29.05, 26.04, 25.12, 18.70, 15.54; HRMS (ESI) exact mass calculated for [M+H]<sup>+</sup> (C<sub>16</sub>H<sub>21</sub>NO) requires *m/z* 243.16231, found *m/z* 243.16198 difference 1.39 ppm.

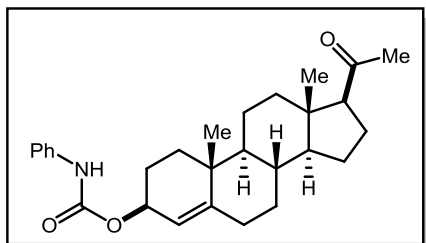

#### (3*S*,8*S*,9*S*,10*R*,13*S*,14*S*,17*S*)-17-Acetyl-10,13-dimethyl-2,3,6,7,8,9,10,11,12,13,14,15,16,17-tetradecahydro-1*H*-cyclopentaphenanthren-3-yl phenylcarbamate

Synthesized using General Procedure A with 3*B*-Hydroxy-pregn-4-en-20-one<sup>24</sup> on a 2.30 mmol scale with respect to the alcohol. The title compound is purified by silica gel column chromatography to give 2.0 g (87% yield) of the title compound. IR (neat): 3330, 2936, 2875, 2850, 1725, 1694, 1600, 1535, 1501, 1442, 1382, 1357, 1312, 1217, 1154, 1109, 1082, 1050, 1028, 997, 977, 952, 911, 845, 751, 733, 693, 679 cm<sup>-1</sup>; <sup>1</sup>H NMR (500 MHz, CDCl<sub>3</sub>) δ 7.31 (d, *J* = 8.0 Hz, 2H), 7.23 (t, *J* = 7.8 Hz, 2H), 6.98 (t, *J* = 7.3 Hz, 1H), 6.53 (s, 1H), 5.27 (s, 1H), 5.18 (dd, *J* = 9.7, 6.2 Hz, 1H), 2.46 (t, *J* = 9.0 Hz, 1H), 2.21 – 2.07 (m, 2H), 2.05 (s, 3H), 2.03 – 1.93

(m, 3H), 1.74 – 1.66 (m, 2H), 1.66 – 1.47 (m, 4H), 1.46 – 1.25 (m, 4H), 1.24 – 1.12 (m, 1H), 1.12 – 1.03 (m, 1H), 1.01 (s, 3H), 0.92 – 0.81 (m, 1H), 0.81 – 0.73 (m, 1H), 0.57 (s, 3H);  $^{13}\text{C}$  NMR (126 MHz,  $\text{CDCl}_3$ )  $\delta$  209.72, 153.48, 149.36, 138.12, 129.17, 123.42, 119.53, 118.65, 71.74, 63.80, 56.41, 54.15, 44.22, 38.98, 37.47, 36.00, 35.08, 32.97, 32.25, 31.69, 25.50, 24.54, 22.92, 21.12, 18.99, 13.52.; HRMS (ESI) exact mass calculated for  $[\text{M}+\text{H}]^+$  ( $\text{C}_{28}\text{H}_{37}\text{NO}_3$ ) requires  $m/z$  435.27734, found  $m/z$  435.27714, difference 0.46 ppm.

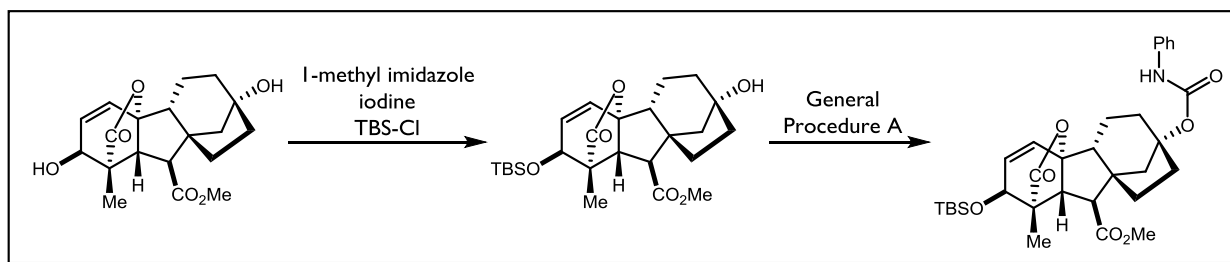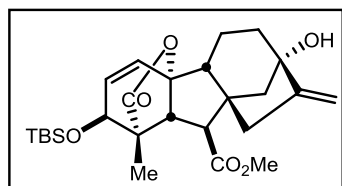

**(1S,2S,4aR,4bR,7S,9aS,10S,10aR)-Methyl 2-((tert-butyl)dimethylsilyloxy)-7-hydroxy-1-methyl-8-methylene-13-oxo-1,2,4b,5,6,7,8,9,10,10a-decahydro-4a,1-(epoxymethano)-7,9a-methanobenzo[a]azulene-10-carboxylate**

To a solution of gibberellic acid methyl ester<sup>25</sup> (1.2 g, 3.3 mmol), 1-methylimidazole (0.8 mL, 10 mmol), and iodine (2.1 g, 8.3 mmol) in THF (10 mL) was added a solution of *tert*-butylchlorodimethylsilane (550 mg, 3.7 mmol) in THF (2 mL). The reaction mixture was stirred at room temperature for 24 hours or until full consumption of the starting material was seen by TLC. The reaction mixture was concentrated, redissolved in EtOAc and washed with aq.  $\text{Na}_2\text{S}_2\text{O}_3$ . The organic layer was concentrated and purified by column chromatography on neutral alumina to afford 1.3 g (82% yield) of the pure product. IR (neat): 3451, 2953, 2933, 2858, 1775, 1736, 1457, 1389, 1328, 1252, 1196, 1160, 1073, 1023, 1004, 973, 945, 895, 866, 838, 778, 670  $\text{cm}^{-1}$ ;  $^1\text{H}$  NMR (500 MHz,  $\text{CDCl}_3$ )  $\delta$  6.21 (d,  $J = 9.3$  Hz, 1H), 5.74 (dd,  $J = 9.3, 3.7$  Hz, 1H), 5.27 (t,  $J = 2.3$  Hz, 1H), 4.95 (s, 1H), 4.10 (d,  $J = 3.6$  Hz, 1H), 3.72 (s, 3H), 3.33 (d,  $J = 10.9$  Hz, 1H), 2.77 (d,  $J = 10.9$  Hz, 1H), 2.24 (dd,  $J = 15.6, 2.5$  Hz, 1H), 2.15 (dt,  $J = 15.8, 3.1$  Hz, 1H), 2.11 – 2.00 (m, 2H), 1.94 – 1.87 (m, 2H), 1.85 – 1.76 (m, 1H), 1.74 (d,  $J = 11.0$  Hz, 1H), 1.71 – 1.62 (m, 1H), 1.16 (s, 3H), 0.91 (s, 9H), 0.09 (d,  $J = 3.1$  Hz, 6H);  $^{13}\text{C}$  NMR (126 MHz,  $\text{CDCl}_3$ )  $\delta$  179.06, 172.44, 157.36, 133.18, 131.59, 107.61, 90.87, 78.34, 70.13, 54.28, 52.97, 52.12, 51.12, 50.84, 50.55, 44.96, 43.15, 38.41, 25.84, 18.20, 17.18, 15.19, -3.97, -4.71.; HRMS (ESI) exact mass calculated for  $[\text{M}+\text{Na}]^+$  ( $\text{C}_{26}\text{H}_{38}\text{O}_6\text{Si}$ ) requires  $m/z$  474.24377, found  $m/z$  474.24429, difference 1.11 ppm.

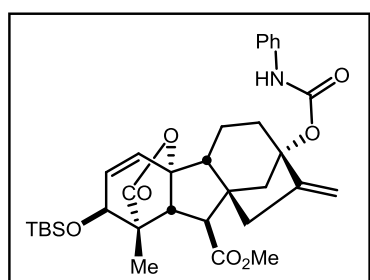

**(1S,2S,4aR,4bR,7S,9aS,10S,10aR)-Methyl 2-((tert-butyl)dimethylsilyloxy)-1-methyl-8-methylene-13-oxo-7-((phenylcarbamoyl)oxy)-1,2,4b,5,6,7,8,9,10,10a-decahydro-4a,1-(epoxymethano)-7,9a-methanobenzo[a]azulene-10-carboxylate**

#### 4a,1-(epoxymethano)-7,9a-methanobenzo[*a*]azulene-10-carboxylate

A flame-dried round-bottomed flask was degassed, flushed with argon, and charged with DMAP (67 mg, 0.55 mmol, 0.2 equiv), THF (7 mL), Et<sub>3</sub>N (0.38 mL, 2.7 mmol, 1 equiv), (1*S*,2*S*,4*aR*,4*bR*,7*S*,9*aS*,10*S*,10*aR*)-methyl 2-((*tert*-butyldimethylsilyl)oxy)-7-hydroxy-1-methyl-8-methylene-13-oxo-1,2,4*b*,5,6,7,8,9,10,10*a*-decahydro-4*a*,1-(epoxymethano)-7,9*a*-methanobenzo[*a*]azulene-10-carboxylate (1.3 g, 2.7 mmol, 1 equiv), and then phenyl isocyanate (0.33 mL, 3.0 mmol, 1.1 equiv). The reaction mixture was stirred at room temperature until the starting tertiary alcohol was fully consumed by TLC. The reaction mixture was then concentrated and the crude reaction mixture was purified by silica gel column chromatography (gradient 100% hexanes to 30% Et<sub>2</sub>O/hexanes) to afford 1.2 g (73% yield) of the title compound. IR (neat): 3348, 2953, 2857, 1774, 1731 1601, 1529, 1502, 1441, 1375, 1313, 1252, 1220, 1161, 1092, 1075, 1026, 1004, 974, 945, 896, 867, 838, 777, 756, 733, 693, 670 cm<sup>-1</sup>; <sup>1</sup>H NMR (500 MHz, CDCl<sub>3</sub>) δ 7.35 (d, *J* = 8.0 Hz, 2H), 7.29 (t, *J* = 7.9 Hz, 2H), 7.05 (t, *J* = 7.3 Hz, 1H), 6.58 (s, 1H), 6.22 (d, *J* = 9.3 Hz, 1H), 5.75 (dd, *J* = 9.3, 3.7 Hz, 1H), 5.22 (s, 1H), 5.03 (s, 1H), 4.10 (d, *J* = 3.7 Hz, 1H), 3.73 (s, 3H), 3.35 (d, *J* = 11.0 Hz, 1H), 2.79 (d, *J* = 11.0 Hz, 1H), 2.44 (t, *J* = 9.7 Hz, 2H), 2.34 (d, *J* = 10.9 Hz, 1H), 2.31 – 2.19 (m, 2H), 2.03 – 1.97 (m, 1H), 1.95 (dd, *J* = 12.0, 5.4 Hz, 1H), 1.88 – 1.78 (m, 1H), 1.76 – 1.67 (m, 1H), 1.16 (s, 3H), 0.91 (s, 9H), 0.09 (d, *J* = 3.5 Hz, 6H); <sup>13</sup>C NMR (126 MHz, CDCl<sub>3</sub>) δ 178.94, 172.35, 153.92, 137.94, 133.21, 131.59, 129.17, 123.55, 120.77, 108.28, 90.74, 70.11, 66.02, 54.28, 53.05, 52.25, 51.22, 50.93, 50.64, 42.90, 40.43, 36.92, 25.85, 18.20, 17.04, 15.18, -3.97, -4.70.; HRMS (ESI) exact mass calculated for [M+H]<sup>+</sup> (C<sub>33</sub>H<sub>43</sub>NO<sub>7</sub>Si) requires *m/z* 593.28088, found *m/z* 593.28193, difference 1.76 ppm.

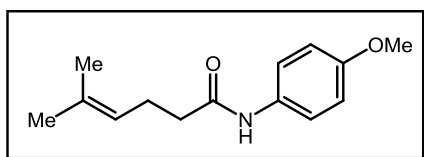

#### *N*-(4-Methoxyphenyl)-5-methylhex-4-enamide

Synthesized using General Procedure B starting from 5-methylhex-4-enoic acid and 4-methoxyaniline on a 10.0 mmol scale with respect to the carboxylic acid. The product was purified by recrystallization from a mixture of hexanes and ethyl acetate to yield 1.8 g (77% yield) of the title compound as a white solid. <sup>1</sup>H NMR (500 MHz, CDCl<sub>3</sub>) δ 7.39 (d, *J* = 9.0 Hz, 2H), 7.11 (br s, 1H), 6.85 (d, *J* = 8.9 Hz, 2H), 5.19-5.17 (m, 1H), 3.79 (s, 3H), 2.45 – 2.32 (m, 4H), 1.72 (s, 3H), 1.65 (s, 3H). Spectral data is consistent with the reported literature spectra.<sup>26</sup>

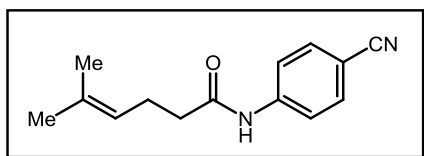

#### *N*-(4-Cyanophenyl)-5-methylhex-4-enamide

Synthesized using General Procedure B starting from 5-methylhex-4-enoic acid and 4-cyanoaniline on a 2.76 mmol scale with respect to the carboxylic acid. The product was purified by recrystallization from a mixture of hexanes and ethyl acetate to yield 510 mg (81% yield) of the title compound as a white solid. IR (neat): 3320, 3107, 2969, 2918, 2226, 1675, 1594, 1519, 1408, 1311, 1255, 1176, 839 cm<sup>-1</sup>; <sup>1</sup>H NMR (500 MHz, CDCl<sub>3</sub>) δ 7.63 (d, *J* = 8.8 Hz, 2H), 7.60 (d, *J* = 8.8 Hz, 2H), 5.16 (m, 1H), 2.43 (m, 4H), 1.72 (s, 3H), 1.65 (s, 3H); <sup>13</sup>C NMR (126 MHz, CDCl<sub>3</sub>) δ 171.55, 142.15, 134.43, 133.44, 122.34, 119.50, 119.01, 110.05, 107.05, 37.90, 25.90, 24.06, 17.95; HRMS (ESI) exact mass calculated for [M+H]<sup>+</sup> (C<sub>14</sub>H<sub>16</sub>N<sub>2</sub>O) requires *m/z* 226.1181, found *m/z* 226.1181, difference 0.0000 ppm.



requires  $m/z$  228.12626, found  $m/z$  228.12583 difference 1.88 ppm.

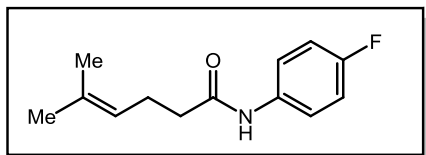

#### ***N*-(4-Fluorophenyl)-5-methylhex-4-enamide**

Synthesized using General Procedure B starting from 5-methylhex-4-enoic acid and 4-fluoroaniline on a 6.24 mmol scale with respect to the carboxylic acid. The product was purified by recrystallization from a mixture of hexanes and ethyl acetate to yield 710 mg (52% yield) of the title compound as a white solid.  $^1\text{H NMR}$  (500 MHz,  $\text{CDCl}_3$ )  $\delta$  7.45 (dd,  $J = 9.0, 4.7$  Hz, 2H), 7.18 (br s, 1H), 7.01 (t,  $J = 8.7$  Hz, 2H), 5.20 – 5.14 (m, 1H), 2.39 (m, 4H), 1.72 (s, 3H), 1.65 (s, 3H). Spectral data is consistent with the reported literature spectra.<sup>4</sup>

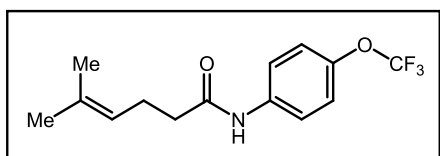

#### ***N*-(4-(Trifluoromethoxy)phenyl)-5-methylhex-4-enamide**

Synthesized using General Procedure B starting from 5-methylhex-4-enoic acid and 4-trifluoromethoxyaniline on a 6.24 mmol scale with respect to the carboxylic acid. The product was purified by recrystallization from a mixture of hexanes and ethyl acetate to yield 921 mg (51% yield) of the title compound as a white solid.  $^1\text{H NMR}$  (500 MHz,  $\text{CDCl}_3$ )  $\delta$  7.52 (d,  $J = 9.0$  Hz, 2H), 7.30 (br s, 1H), 7.17 (d,  $J = 8.6$  Hz, 2H), 5.21 – 5.13 (m, 1H), 2.41 (m, 4H), 1.72 (s, 3H), 1.65 (s, 3H). Spectral data is consistent with the reported literature spectra.<sup>4</sup>

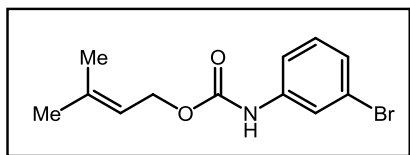

#### **3-Methylbut-2-en-1-yl (3-bromophenyl)carbamate**

Synthesized using General Procedure D starting from commercially available 3-bromoaniline on a 3.41 mmol scale with respect to prenil and the carbamate. The crude compound is purified by silica gel column chromatography to give 720 mg (74% yield) of the title compound. IR (neat): 3312, 2973, 2934, 1700, 1589, 1526, 1479, 1421, 1380, 1304, 1274, 1214, 1167, 1094, 1072, 1054, 994, 871, 771, 679  $\text{cm}^{-1}$ ;  $^1\text{H NMR}$  (500 MHz,  $\text{CDCl}_3$ )  $\delta$  7.64 (t,  $J = 2.0$  Hz, 1H), 7.25 – 7.23 (m, 1H), 7.20 – 7.12 (m, 2H), 6.56 (s, 1H), 5.39 (tdq,  $J = 7.2, 2.8, 1.4$  Hz, 1H), 4.67 (d,  $J = 7.3$  Hz, 2H), 1.77 (dd,  $J = 15.9, 1.3$  Hz, 6H);  $^{13}\text{C NMR}$  (126 MHz,  $\text{CDCl}_3$ )  $\delta$  153.41, 139.91, 139.42, 130.42, 126.44, 122.88, 121.57, 118.56, 117.13, 62.39, 25.95, 18.21.; HRMS (ESI) exact mass calculated for  $[\text{M}+\text{Na}]^+$  ( $\text{C}_{12}\text{H}_{14}\text{BrNO}_2$ ) requires  $m/z$  283.02079, found  $m/z$  283.02126, difference 1.67 ppm.

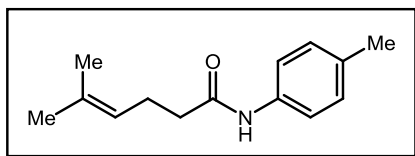

#### **5-Methyl-*N*-(p-tolyl)hex-4-enamide**

Synthesized using General Procedure B starting from 5-methylhex-4-enoic acid and p-toluidine on a 2.76 mmol scale with respect to the carboxylic acid. The product was purified by recrystallization from a mixture of hexanes and ethyl acetate to yield 372 mg (62% yield) of the title compound as a white solid. IR (neat) 3292, 2358, 3195, 3130, 2962, 2925, 1660, 1604, 1535, 1511, 1448, 1402, 1377, 1351, 1312, 1246, 1190, 1120, 1109, 989, 960, 858, 821, 742  $\text{cm}^{-1}$ ;  $^1\text{H NMR}$  (500 MHz,  $\text{CDCl}_3$ )  $\delta$  7.37 (d,  $J = 8.4$  Hz, 2H), 7.11 (d,  $J = 8.1$  Hz, 2H), 5.22 – 5.13 (m, 1H), 2.39 (m, 4H), 2.31 (s, 3H), 1.72 (s, 3H), 1.65 (s, 3H).  $^{13}\text{C NMR}$  (126 MHz,  $\text{CDCl}_3$ )  $\delta$  ;

HRMS (ESI) exact mass calculated for  $[M+H]^+$  ( $C_{14}H_{19}NO$ ) requires  $m/z$  217.14666, found  $m/z$  217.14627 difference 1.82 ppm.

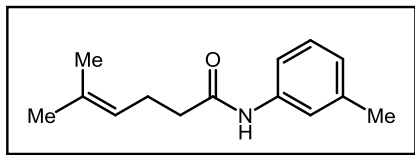

### 5-Methyl-N-(m-tolyl)hex-4-enamide

Synthesized using General Procedure B starting from 5-methylhex-4-enoic acid and m-toluidine on a 2.76 mmol scale with respect to the carboxylic acid. The product was purified by silica gel chromatography (gradient from 0% EtOAc in Hexanes to 15% EtOAc in Hexanes) to afford the 452 mg (75% yield) of the title compound as a colorless oil. IR (neat) 3294, 2968, 2919, 1658, 1614, 1595, 1551, 1490, 1441, 1376, 1345, 1306, 1262, 1209, 1145, 780, 691  $cm^{-1}$ ;  $^1H$  NMR (500 MHz,  $CDCl_3$ )  $\delta$  7.38 (s, 1H), 7.25 (m, 1H), 7.19 (t,  $J = 7.7$  Hz, 1H), 7.14 (s, 1H), 6.91 (d,  $J = 7.4$  Hz, 1H), 5.17 (m, 1H), 2.39 (m, 4H), 2.33 (s, 3H), 1.72 (s, 3H), 1.65 (s, 3H);  $^{13}C$  NMR (126 MHz,  $CDCl_3$ )  $\delta$  171.06, 139.07, 138.01, 133.93, 128.94, 125.09, 122.74, 120.50, 116.86, 37.93, 25.90, 24.32, 21.65, 17.94; HRMS (ESI) exact mass calculated for  $[M+H]^+$  ( $C_{14}H_{19}NO$ ) requires  $m/z$  217.14666, found  $m/z$  217.14656 difference 0.48 ppm.

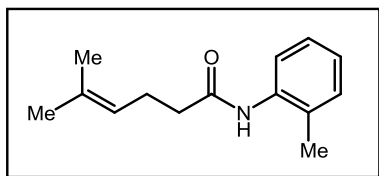

### 5-Methyl-N-(o-tolyl)hex-4-enamide

Synthesized using General Procedure B starting from 5-methylhex-4-enoic acid and o-toluidine on a 3.68 mmol scale with respect to the carboxylic acid. The product was purified by recrystallization from a mixture of hexanes and ethyl acetate to furnish the 500 mg (63% yield) of the title compound as a white solid.  $^1H$  NMR (500 MHz,  $CDCl_3$ )  $\delta$  7.83 (d,  $J = 8.0$  Hz, 1H), 7.25 – 7.13 (m, 2H), 7.07 (t,  $J = 7.7$  Hz, 1H), 6.99 (br s, 1H), 5.20 (m, 1H), 2.44 (m, 4H), 2.24 (s, 3H), 1.72 (s, 3H), 1.66 (s, 3H). Spectral data is consistent with the reported literature spectra.<sup>4</sup>

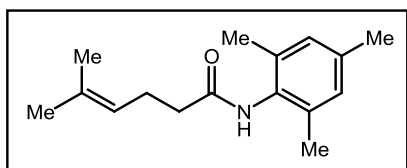

### N-Mesityl-5-methylhex-4-enamide

Synthesized using General Procedure B starting from 5-methylhex-4-enoic acid and 2,4,6-trimethylaniline on a 6.05 mmol scale with respect to the carboxylic acid. The product was purified by recrystallization from a mixture of hexanes and ethyl acetate to furnish 1.12 g (75%) of the title compound as a white solid. IR (neat) 3257, 2976, 2921, 2858, 1650, 1609, 1522, 1451, 1376, 1350, 1309, 1264, 1231, 1196, 1107, 1039, 988, 848, 741, 720; N.B. product is a 3:1 mixture of rotamers at RT in  $CDCl_3$  and was characterized at high temperature in DMSO,  $^1H$  NMR (500 MHz,  $DMSO-d_6$  at 50  $^{\circ}C$ )  $\delta$  8.96 (s, 1H), 6.85 (s, 2H), 5.18 (m, 1H), 2.31 (m, 4H), 2.22 (s, 3H), 2.09 (s, 6H), 1.68 (s, 3H), 1.62 (s, 3H);  $^{13}C$  NMR (126 MHz,  $DMSO-d_6$  at 50  $^{\circ}C$ )  $\delta$  170.20, 134.89, 134.66, 132.61, 131.24, 127.92, 123.33, 35.44, 25.24, 24.04, 20.23, 17.70, 17.34; HRMS (ESI) exact mass calculated for  $[M+H]^+$  ( $C_{16}H_{23}NO$ ) requires  $m/z$  245.17796, found  $m/z$  245.17771 difference 1.06 ppm.

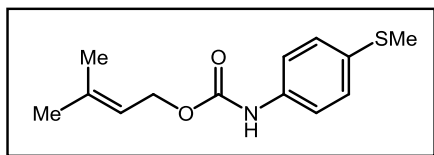

### 3-Methylbut-2-en-1-yl (4-(methylthio)phenyl)carbamate

Synthesized using a slight modification of General

Procedure A starting from prenil and 4-(methylthio)phenylisocyanate (in place of phenyl isocyanate) on a 9.85 mmol scale with respect to the prenil and the isocyanate. The crude compound is purified by recrystallization from a mixture of hexanes and ethyl acetate to furnish 1.70 g (69% yield) of the title compound as a white solid. IR (neat) 3325, 2971, 2913, 1698, 1585, 1517, 1495, 1441, 1401, 1380, 1326, 1306, 1282, 1228, 1123, 1094, 1066, 1015, 980, 967, 860, 816, 788, 765, 747;  $^1\text{H}$  NMR (500 MHz,  $\text{CDCl}_3$ )  $\delta$  7.31 (d,  $J = 8.3$  Hz, 2H), 7.22 (d,  $J = 8.6$  Hz, 2H), 6.69 (br s, 1H), 5.38 (m, 1H), 4.65 (d,  $J = 7.3$  Hz, 2H), 2.44 (s, 3H), 1.77 (s, 3H), 1.73 (s, 3H);  $^{13}\text{C}$  NMR (126 MHz,  $\text{CDCl}_3$ )  $\delta$  153.72, 139.52, 135.88, 132.40, 128.50, 119.41, 118.73, 62.71, 25.90, 18.16, 17.06; HRMS (ESI) exact mass calculated for  $[\text{M}+\text{Na}]^+$  ( $\text{C}_{13}\text{H}_{17}\text{NO}_2\text{S}$ ) requires  $m/z$  251.09800, found  $m/z$  251.09757 difference 1.7 ppm.

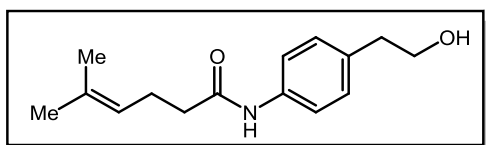

### ***N*-(4-(2-Hydroxyethyl)phenyl)-5-methylhex-4-enamide**

Synthesized using General Procedure B starting from 5-methylhex-4-enoic acid and 2-(4-aminophenyl)ethan-1-ol on a 5.30 mmol scale with respect to the carboxylic acid. The product was purified by recrystallization from a mixture of hexanes and ethyl acetate to furnish 836 mg (64% yield) of the title compound as an off-white solid. IR (neat) 3293, 3035, 2967, 2915, 2877, 1657, 1594, 1526, 1452, 1411, 1375, 1347, 1308, 1277, 1248, 1182, 1111, 1047, 1023, 986, 967, 826;  $^1\text{H}$  NMR (500 MHz,  $\text{CDCl}_3$ )  $\delta$  7.43 (d,  $J = 8.3$  Hz, 2H), 7.24 (br s, 1H), 7.17 (d,  $J = 8.3$  Hz, 2H), 5.17 (m, 1H), 3.83 (t,  $J = 6.5$  Hz, 2H), 2.83 (t,  $J = 6.5$  Hz, 2H), 2.44 – 2.34 (m, 4H), 1.72 (s, 3H), 1.65 (s, 3H);  $^{13}\text{C}$  NMR (126 MHz,  $\text{CDCl}_3$ )  $\delta$  171.14, 136.52, 134.47, 133.95, 129.67, 122.71, 120.24, 63.79, 38.72, 37.82, 25.90, 24.33, 17.94; HRMS (ESI) exact mass calculated for  $[\text{M}+\text{H}]^+$  ( $\text{C}_{15}\text{H}_{21}\text{NO}_2$ ) requires  $m/z$  247.15723, found  $m/z$  247.15717 difference 0.22 ppm.

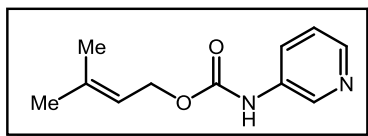

### **3-Methylbut-2-en-1-yl pyridin-3-ylcarbamate**

Synthesized using General Procedure D from prenil and 3-aminopyridine on a 6.89 mmol scale with respect to the aniline component. The crude product is purified by silica gel column chromatography to give 880 mg (62% yield) of the title compound. IR (neat): 3238, 3184, 2975, 2913, 1728, 1610, 1550, 1484, 1424, 1379, 1331, 1303, 1225, 1126, 1062, 1028, 978, 859, 801, 766, 705  $\text{cm}^{-1}$ ;  $^1\text{H}$  NMR (500 MHz,  $\text{CDCl}_3$ )  $\delta$  8.39 (s, 1H), 8.21 (d,  $J = 4.6$  Hz, 1H), 7.92 (d,  $J = 8.5$  Hz, 1H), 7.20 – 7.13 (m, 1H), 7.11 (s, 1H), 5.30 (t,  $J = 7.4$  Hz, 1H), 4.59 (d,  $J = 7.3$  Hz, 2H), 1.66 (d,  $J = 16.4$  Hz, 6H);  $^{13}\text{C}$  NMR (126 MHz,  $\text{CDCl}_3$ )  $\delta$  153.81, 144.48, 140.29, 139.92, 135.18, 125.85, 123.84, 118.50, 62.50, 25.94, 18.21; HRMS (ESI) exact mass calculated for  $[\text{M}+\text{Na}]^+$  ( $\text{C}_{11}\text{H}_{14}\text{N}_2\text{O}_2$ ) requires  $m/z$  206.10553, found  $m/z$  206.10576, difference 1.1 ppm.

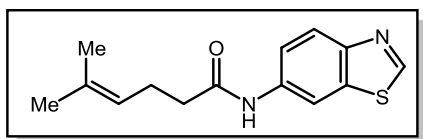

### ***N*-(Benzo[*d*]thiazol-6-yl)-5-methylhex-4-enamide**

Synthesized using General Procedure B using 6-aminobenzothiazole on a 3.34 mmol scale with respect to the aniline. The crude product is purified by silica gel column chromatography to give 0.6 g (69% yield) of the title compound. IR (neat): 3289, 2919, 2348,

1663, 1605, 1576, 1531, 1475, 1447, 1399, 1246, 1195, 833  $\text{cm}^{-1}$ ;  $^1\text{H}$  NMR (500 MHz,  $\text{CDCl}_3$ )  $\delta$  8.90 (s, 1H), 8.57 (s, 1H), 8.00 (d,  $J = 8.7$  Hz, 1H), 7.80 (s, 1H), 7.32 – 7.27 (m, 1H), 5.16 (s, 1H), 2.43 (m, 4H), 1.67 (d,  $J = 33.4$  Hz, 6H).;  $^{13}\text{C}$  NMR (126 MHz,  $\text{CDCl}_3$ )  $\delta$  171.53, 153.47, 149.89, 135.93, 134.93, 134.07, 123.58, 122.54, 118.97, 112.59, 37.84, 25.89, 24.29, 17.92.; HRMS (ESI) exact mass calculated for  $[\text{M}+\text{H}]^+$  ( $\text{C}_{14}\text{H}_{16}\text{N}_2\text{OS}$ ) requires  $m/z$  260.09833, found  $m/z$  260.09875, difference 1.61 ppm.

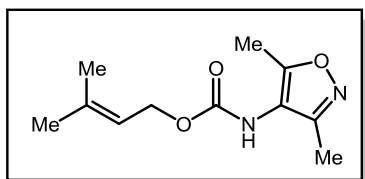

### 3-Methylbut-2-en-1-yl (3,5-dimethylisoxazol-4-yl)carbamate

Synthesized using a slight modification of General Procedure A using 4-isocyanato-3,5-dimethylisoxazole (in place of phenyl isocyanate) and prenol on a 6.94 mmol scale with respect to the isocyanate and alcohol components. The crude compound is recrystallized from a mixture of hexanes and ethyl acetate to afford 1.29 g (83% yield) of the title compound as a white solid. IR (neat) 3276, 2975, 2932, 1729, 1703, 1657, 1521, 1442, 1382, 1345, 1309, 1242, 1125, 1061, 1035, 979, 881, 848, 775, 756;  $^1\text{H}$  NMR (500 MHz,  $\text{CDCl}_3$ )  $\delta$  6.12 (br s, 1H), 5.34 (m, 1H), 4.61 (m, 2H), 2.29 (s, 3H), 2.16 (s, 3H), 1.75 (s, 3H), 1.70 (s, 3H);  $^{13}\text{C}$  NMR (126 MHz,  $\text{CDCl}_3$ ) 163.97, 158.02, 155.06, 139.61, 118.47, 113.62, 62.73, 25.86, 18.12, 11.00, 9.62; HRMS (ESI) exact mass calculated for  $[\text{M}+\text{H}]^+$  requires  $m/z$  224.11609, found  $m/z$  224.11577 difference 1.42 ppm.

## Synthesis and Characterization of Products

### General Information and Setup

All reactions were done on a 1.0 mmol scale with respect to substrate. Reactions were run in 2 dram borosilicate vials equipped with a screwcap and teflon septa under inert atmosphere. Reactions were irradiated with a commercially available 34W Kessil KSH150B Blue LED lamp with a fan positioned such that the vial was kept at room temperature throughout irradiation and stirring. As a caution, the light from the lamps is very bright and appropriate safety precautions should be taken. Example reaction setups are demonstrated below.

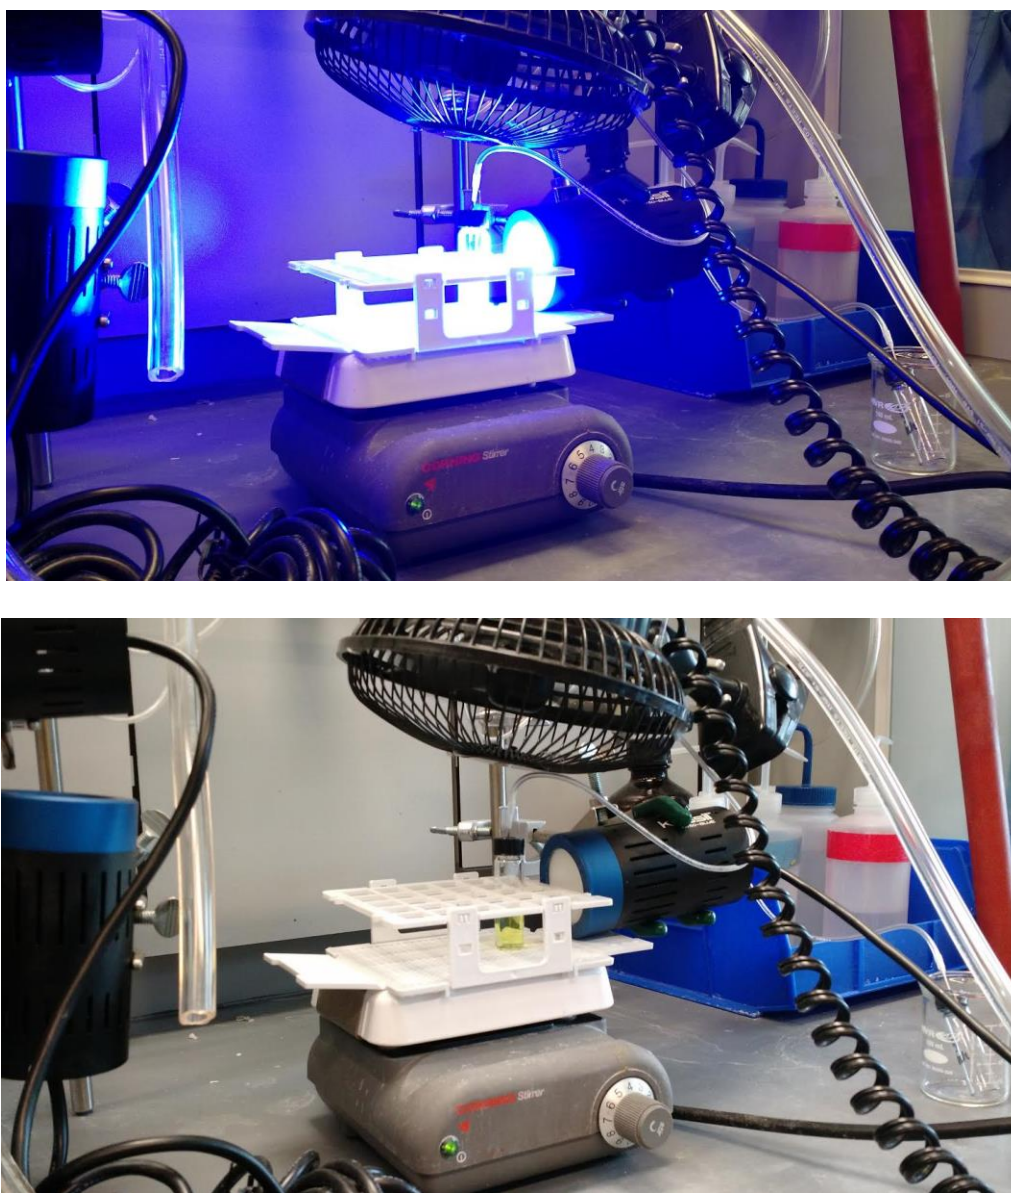

**Figure S.1:** Sample reaction setup.

## General Procedure for Photocatalytic Hydroamination via PCET

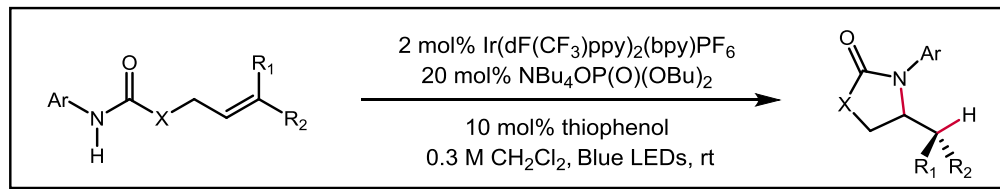

A screw cap dram vial with a teflon septa was charged with starting material (1.0 mmol, 1 equiv), [Ir(dF(CF<sub>3</sub>)ppy)<sub>2</sub>(bpy)](PF<sub>6</sub>)<sup>27</sup> (20.2 mg, 0.02 mmol, 2 mol%), and tetrabutylammonium dibutyl phosphate (90.0 mg, 0.2 mmol, 20 mol%) and purged with nitrogen. 3.3 mL of degassed, anhydrous DCM (0.3 M reaction concentration) was added followed by thiophenol (11.0 mg, 0.1 mmol, 10 mol%). The reaction was irradiated with blue LEDs and allowed to stir at room temperature until complete conversion of the starting material was observed by TLC. Upon completion, the reaction mixtures were concentrated. The product was purified from the crude residue by silica gel column chromatography to yield the titled compounds.

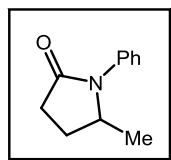

### 5-Methyl-1-phenylpyrrolidin-2-one (2)

Synthesized using the general procedure, stirring with irradiation for 72 hours. The product is purified by silica gel column chromatography (gradient from 0% EtOAc in Hexanes to 35% EtOAc in Hexanes) to afford 149 mg (85% yield) of the title compound as a colorless oil. <sup>1</sup>H NMR (500 MHz, CDCl<sub>3</sub>) δ 7.44 – 7.33 (m, 4H), 7.21 (tt, *J* = 6.7, 1.9 Hz, 1H), 4.30 (dp, *J* = 7.4, 6.1 Hz, 1H), 2.69 – 2.50 (m, 2H), 2.38 (dddd, *J* = 13.2, 9.5, 7.4, 6.0 Hz, 1H), 1.76 (dddd, *J* = 12.9, 9.5, 7.3, 5.7 Hz, 1H), 1.21 (d, *J* = 6.2 Hz, 3H). Spectral data is consistent with the reported literature spectra.<sup>28</sup>

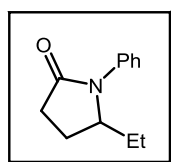

### 5-Ethyl-1-phenylpyrrolidin-2-one (3)

Synthesized using the general procedure, stirring with irradiation for 12 hours. The product is purified by silica gel column chromatography (gradient from 0% EtOAc in Hexanes to 35% EtOAc in Hexanes) to afford 166 mg (88%) of the title compound as a clear oil. IR (neat) 2961, 2934, 2878, 1693, 1597, 1542, 1498, 1461, 1392, 1294, 1222, 1176, 1131, 760, 695 cm<sup>-1</sup>; <sup>1</sup>H NMR (500 MHz, CDCl<sub>3</sub>) δ 7.45 – 7.32 (m, 4H), 7.24 – 7.18 (m, 1H), 4.17 (tdd, *J* = 8.3, 5.3, 3.0 Hz, 1H), 2.69 – 2.48 (m, 2H), 2.31 (dddd, *J* = 12.8, 9.8, 7.8, 6.5 Hz, 1H), 1.91 – 1.77 (m, 1H), 1.69 (dq, *J* = 13.7, 7.5, 3.1 Hz, 1H), 1.50 – 1.33 (m, 1H), 0.86 (t, *J* = 7.4 Hz, 3H); <sup>13</sup>C NMR (126 MHz, CDCl<sub>3</sub>) δ 174.53, 137.79, 129.12, 125.94, 124.32, 60.96, 31.51, 26.20, 23.41, 8.81; HRMS (ESI) exact mass calculated for [M+H]<sup>+</sup> (C<sub>12</sub>H<sub>15</sub>NO) requires *m/z* 189.11536, found *m/z* 189.11512 difference 1.27 ppm.

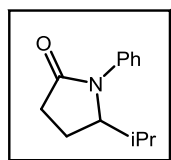

### 5-Isopropyl-1-phenylpyrrolidin-2-one (4)

Synthesized using the general procedure, stirring with irradiation for 12 hours. The product is purified by silica gel column chromatography (gradient from 0%

EtOAc in Hexanes to 20% EtOAc in Hexanes) to afford 182 mg (90% yield) of the title compound as a white solid. IR (neat) 2962, 1692, 1598, 1498, 1468, 1394, 1323, 1292, 1224, 1162, 1105, 762, 695  $\text{cm}^{-1}$ ;  $^1\text{H}$  NMR (500 MHz,  $\text{CDCl}_3$ )  $\delta$  7.42 – 7.34 (m, 4H), 7.20 (tt,  $J = 7.3$ , 1.7 Hz, 1H), 4.23 (ddd,  $J = 8.6$ , 5.0, 3.6 Hz, 1H), 2.67 – 2.47 (m, 2H), 2.12 (dddd,  $J = 13.2$ , 10.2, 8.6, 7.1 Hz, 1H), 2.00 (heptet of doublets,  $J = 6.9$ , 3.6 Hz, 1H), 1.90 (dddd,  $J = 13.2$ , 9.9, 6.5, 5.0 Hz, 1H), 0.89 (d,  $J = 7.0$  Hz, 3H), 0.75 (d,  $J = 6.8$  Hz, 3H);  $^{13}\text{C}$  NMR (126 MHz,  $\text{CDCl}_3$ )  $\delta$  174.69, 137.74, 129.12, 126.02, 124.61, 64.41, 31.76, 28.47, 18.59, 17.80, 14.39; HRMS (ESI) exact mass calculated for  $[\text{M}+\text{H}]^+$  ( $\text{C}_{13}\text{H}_{17}\text{NO}$ ) requires  $m/z$  203.13101, found  $m/z$  203.13138 difference 1.81 ppm.

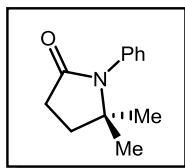

#### 5,5-Dimethyl-1-phenylpyrrolidin-2-one (5)

Synthesized using the general procedure, stirring with irradiation for 12 hours. The product is purified by silica gel column chromatography (gradient from 0% EtOAc in Hexanes to 40% EtOAc in Hexanes) to afford 165 mg (87% yield) of the title compound as a white solid. IR (neat) 3057, 2966, 1683, 1596, 1499, 1463, 1390, 1377, 1325, 1255, 1236, 1225, 1202, 1163, 1117, 1062, 1028, 887, 756, 704, 660;  $^1\text{H}$  NMR (500 MHz,  $\text{CDCl}_3$ )  $\delta$  7.44 – 7.39 (m, 2H), 7.37 – 7.33 (m, 1H), 7.13 (m, 2H), 2.60 (t,  $J = 8.0$  Hz, 2H), 2.07 (t,  $J = 8.0$  Hz, 2H), 1.26 (s, 6H);  $^{13}\text{C}$  NMR (126 MHz,  $\text{CDCl}_3$ )  $\delta$  174.95, 136.42, 129.61, 129.31, 128.07, 62.57, 34.96, 30.32, 27.75; HRMS (ESI) exact mass calculated for  $[\text{M}+\text{H}]^+$  ( $\text{C}_{12}\text{H}_{15}\text{NO}$ ) requires  $m/z$  189.11536, found  $m/z$  189.11521 difference 0.80 ppm.

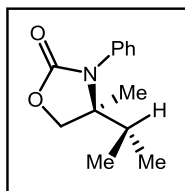

#### 4-Isopropyl-4-methyl-3-phenyloxazolidin-2-one (6)

Synthesized using the general procedure, stirring with irradiation for 14 hours. The product is purified by silica gel column chromatography (gradient from 0% EtOAc in Hexanes to 25% EtOAc in Hexanes) to afford 194 mg (89% yield) of the title compound as a clear oil. IR (neat) 2973, 1748, 1598, 1499, 1454, 1402, 1386, 1366, 1319, 1235, 1195, 1176, 1143, 1104, 1064, 1012, 966, 763, 720, 699, 682  $\text{cm}^{-1}$ ;  $^1\text{H}$  NMR (500 MHz,  $\text{CDCl}_3$ )  $\delta$  7.44 – 7.39 (m, 2H), 7.36 – 7.31 (m, 1H), 7.30 – 7.27 (m, 2H), 4.38 (d,  $J = 8.8$  Hz, 1H), 3.99 (d,  $J = 8.8$  Hz, 1H), 1.90 (heptet,  $J = 6.9$  Hz, 1H), 1.38 (s, 3H), 1.09 (d,  $J = 6.8$  Hz, 3H), 0.89 (d,  $J = 6.9$  Hz, 3H);  $^{13}\text{C}$  NMR (126 MHz,  $\text{CDCl}_3$ )  $\delta$  157.49, 135.56, 129.41, 128.55, 127.97, 69.77, 65.95, 34.47, 25.37, 17.17, 17.15; HRMS (ESI) exact mass calculated for  $[\text{M}+\text{H}]^+$  requires  $m/z$  219.12593, found  $m/z$  219.12580 difference 0.57 ppm.

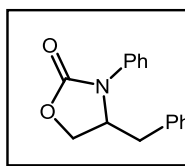

#### 4-Benzyl-3-phenyloxazolidin-2-one (7)

Synthesized using a modification of the general procedure in which the loading of thiophenol is increased to 30 mol%. The reaction is irradiated with stirring for 72 hours. The product is purified by silica gel column chromatography (gradient from 0% EtOAc in Hexanes to 25% EtOAc in Hexanes) to afford 205 mg (81% yield) of the title compound as a white solid.  $^1\text{H}$  NMR (500 MHz,  $\text{CDCl}_3$ )  $\delta$  7.50 – 7.46 (m, 2H), 7.39 – 7.34 (m, 2H), 7.27 – 7.22 (m, 2H), 7.21 – 7.18 (m, 1H), 7.17 – 7.12 (m, 1H), 7.08 – 7.03 (m, 2H), 4.59 (m, 1H), 4.27 (t,  $J = 8.5$  Hz, 1H), 4.13 (dd,  $J = 8.8$ , 4.8 Hz, 1H), 3.07 (dd,  $J = 13.9$ , 3.5 Hz, 1H), 2.70 (dd,  $J = 13.9$ , 9.4 Hz, 1H). Spectral data is consistent with the reported literature spectra.<sup>29</sup>

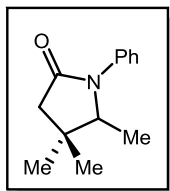

#### 4,4,5-Trimethyl-1-phenylpyrrolidin-2-one (8)

Synthesized using the general procedure, stirring with irradiation for 12 hours. The product is purified by silica gel column chromatography (gradient from 0% EtOAc in Hexanes to 20% EtOAc in Hexanes) to afford 184 mg (91% yield) of the title compound as a white solid. IR (neat) 3064, 2963, 2872, 1690, 1597, 1498, 1394, 1373, 1306, 1268, 1237, 1213, 1136, 1117, 1095, 1075, 987, 966, 953, 834, 755, 693, 665  $\text{cm}^{-1}$ ;  $^1\text{H}$  NMR (500 MHz,  $\text{CDCl}_3$ )  $\delta$  7.40 – 7.35 (m, 4H), 7.20 (m, 1H), 3.85 (q,  $J$  = 6.6 Hz, 1H), 2.45 (d,  $J$  = 16.5 Hz, 1H), 2.31 (d,  $J$  = 16.4 Hz, 1H), 1.23 (s, 3H), 1.10 (s, 3H), 1.08 (d,  $J$  = 6.6 Hz, 3H);  $^{13}\text{C}$  NMR (126 MHz,  $\text{CDCl}_3$ )  $\delta$  173.45, 138.04, 129.07, 125.83, 124.20, 65.25, 46.29, 35.94, 27.91, 22.82, 14.43; HRMS (ESI) exact mass calculated for  $[\text{M}+\text{H}]^+$  ( $\text{C}_{13}\text{H}_{17}\text{NO}$ ) requires  $m/z$  203.13101, found  $m/z$  203.13063 difference 1.89 ppm.

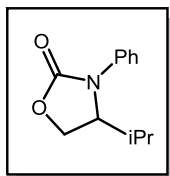

#### 4-Isopropyl-3-phenyloxazolidin-2-one (9)

Synthesized using the general procedure, stirring with irradiation for 12 hours. The product is purified by silica gel column chromatography (gradient from 0% EtOAc in Hexanes to 25% EtOAc in Hexanes) to afford 183 mg (89% yield) of the title compound as a colorless oil. IR (neat) 3065, 2964, 2877, 1743, 1598, 1501, 1458, 1501, 1405, 1392, 1309, 1211, 1148, 1119, 1056, 1003, 995, 959, 760, 694, 676;  $^1\text{H}$  NMR (500 MHz,  $\text{CDCl}_3$ )  $\delta$  7.49 – 7.43 (m, 2H), 7.42 – 7.37 (m, 2H), 7.19 (tt,  $J$  = 7.3, 1.2 Hz, 1H), 4.47 – 4.38 (m, 2H), 4.28 – 4.20 (m, 1H), 2.13 (m, 1H), 0.91 (d,  $J$  = 7.1 Hz, 3H), 0.85 (d,  $J$  = 6.8 Hz, 3H);  $^{13}\text{C}$  NMR (126 MHz,  $\text{CDCl}_3$ )  $\delta$  156.18, 136.83, 129.31, 125.44, 122.40, 62.61, 60.64, 27.70, 17.83, 14.34; HRMS (ESI) exact mass calculated for  $[\text{M}+\text{H}]^+$  ( $\text{C}_{12}\text{H}_{15}\text{NO}_2$ ) requires  $m/z$  205.11028, found  $m/z$  205.11000 difference 1.35 ppm.

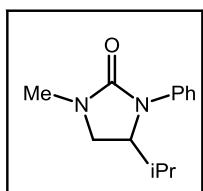

#### 4-Isopropyl-1-methyl-3-phenylimidazolidin-2-one (10)

Followed general procedure with 1-methyl-1-(3-methylbut-2-en-1-yl)-3-phenylurea (218 mg, 1 mmol) for 45 hours and purified using alumina column chromatography (gradient 100% hexanes to 33% EtOAc/hexanes) to give 197 mg (90% yield) of the title compound. IR (neat): 2954, 2914, 2870, 1683, 1599, 1494, 1457, 1430, 1402, 1387, 1343, 1322, 1277, 1262, 1214, 1110, 985, 904, 802, 757, 714, 695  $\text{cm}^{-1}$ ;  $^1\text{H}$  NMR (500 MHz,  $\text{CDCl}_3$ )  $\delta$  7.41 (d,  $J$  = 8.0 Hz, 2H), 7.33 (t,  $J$  = 7.8 Hz, 2H), 7.07 (t,  $J$  = 7.3 Hz, 1H), 4.29 – 4.22 (m, 1H), 3.41 (t,  $J$  = 9.3 Hz, 1H), 3.21 (dd,  $J$  = 9.0, 5.7 Hz, 1H), 2.86 (s, 3H), 2.19 – 2.11 (m, 1H), 0.89 (d,  $J$  = 6.9 Hz, 3H), 0.76 (d,  $J$  = 6.8 Hz, 3H);  $^{13}\text{C}$  NMR (126 MHz,  $\text{CDCl}_3$ )  $\delta$  158.64, 138.94, 128.88, 123.67, 121.81, 57.46, 44.95, 31.04, 27.46, 18.05, 14.34.; HRMS (ESI) exact mass calculated for  $[\text{M}+\text{Na}]^+$  ( $\text{C}_{13}\text{H}_{18}\text{N}_2\text{O}$ ) requires  $m/z$  218.14191, found  $m/z$  218.14226, difference 1.59 ppm.

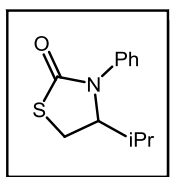

#### 4-Isopropyl 3-phenylthiazolidin-2-one (11)

Synthesized using the general procedure, stirring with irradiation for 12 hours.



The product is purified by silica gel column chromatography (gradient from 0% EtOAc in Hexanes to 10% EtOAc in Hexanes) to afford 161 mg (73% yield) of the title compound as a white solid. IR (neat) 3061, 2965, 2932, 2914, 2877, 1652, 1593, 1493, 1965, 1453, 1392, 1379, 1322, 1296, 1248, 1210, 1183, 1155, 1097, 1079, 993, 946, 922, 841, 766, 755, 710, 694, 662  $\text{cm}^{-1}$ ;  $^1\text{H}$  NMR (500 MHz,  $\text{CDCl}_3$ )  $\delta$  7.41 (m, 2H), 7.30 – 7.27 (m, 2H), 7.27 – 7.24 (m, 1H), 4.37 (ddd,  $J = 8.5, 6.8, 3.7$  Hz, 1H), 3.37 (dd,  $J = 11.2, 8.5$  Hz, 1H), 3.20 (dd,  $J = 11.2, 6.8$  Hz, 1H), 2.02 (ddt,  $J = 10.2, 6.9, 3.2$  Hz, 1H), 0.90 (t,  $J = 6.9$  Hz, 6H);  $^{13}\text{C}$  NMR (126 MHz,  $\text{CDCl}_3$ )  $\delta$  172.09, 138.19, 129.38, 127.04, 126.12, 65.63, 28.95, 25.25, 18.32, 14.68; HRMS (ESI) exact mass calculated for  $[\text{M}+\text{H}]^+$  ( $\text{C}_{12}\text{H}_{15}\text{NOS}$ ) requires  $m/z$  221.08743, found  $m/z$  221.08710 difference 1.52 ppm.

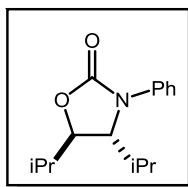

#### 4,5-Diisopropyl-3-phenyloxazolidin-2-one (12)

Followed general procedure with 2,5-dimethylhex-4-en-3-yl phenylcarbamate (248 mg, 1 mmol) and methyl acrylate for 21 hours and purified using alumina column chromatography (gradient 100% hexanes to 33% EtOAc/hexanes) to give 202 mg (82% yield) of the title compound as a 10:1 mixture of

diastereomers.

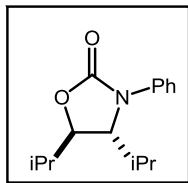

#### Trans-4,5-Diisopropyl-3-phenyloxazolidin-2-one (12 major)

##### Major diastereomer:

IR (neat): 2963, 2877, 1742, 1599, 1502, 1462, 1407, 1392, 1314, 1280, 1215, 1181, 1146, 1120, 1034, 1013, 977, 947, 803, 761, 693, 678  $\text{cm}^{-1}$ ;  $^1\text{H}$  NMR (500 MHz,  $\text{CDCl}_3$ )  $\delta$  7.49 (d,  $J = 8.0$  Hz, 2H), 7.38 (t,  $J = 7.9$  Hz, 2H), 7.17 (t,  $J = 7.4$  Hz, 1H), 4.10 (dd,  $J = 5.3, 3.0$  Hz, 1H), 4.05 (t,  $J = 3.2$  Hz, 1H), 2.14 – 2.04 (m, 1H), 1.96 – 1.86 (m,  $J = 6.8$  Hz, 1H), 1.05 (dd,  $J = 6.8, 3.0$  Hz, 6H), 0.90 (d,  $J = 7.1$  Hz, 3H), 0.86 (d,  $J = 6.9$  Hz, 3H).;  $^{13}\text{C}$  NMR (126 MHz,  $\text{CDCl}_3$ )  $\delta$  155.62, 137.07, 129.33, 125.19, 122.04, 78.16, 63.41, 33.18, 28.38, 17.83, 17.80, 16.50, 15.08.; HRMS (ESI) exact mass calculated for  $[\text{M}+\text{H}]^+$  ( $\text{C}_{15}\text{H}_{21}\text{NO}_2$ ) requires  $m/z$  247.15723, found  $m/z$  247.15763, difference 1.63 ppm.

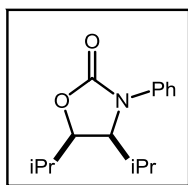

#### Cis-4,5-Diisopropyl-3-phenyloxazolidin-2-one (12 minor)

##### Minor diastereomer:

IR (neat): 2964, 2928, 2875, 1727, 1600, 1504, 1468, 1412, 1397, 1324, 1274, 1218, 1151, 1118, 1016, 982, 825, 763, 691, 677  $\text{cm}^{-1}$ ;  $^1\text{H}$  NMR (500 MHz,  $\text{CDCl}_3$ )  $\delta$  7.53 (d,  $J = 8.0$  Hz, 2H), 7.37 (t,  $J = 7.8$  Hz, 2H), 7.17 (t,  $J = 7.4$  Hz, 1H), 4.34 (d,  $J = 6.6$  Hz, 1H), 4.17 (dd,  $J = 11.1, 6.6$  Hz, 1H), 2.18 – 2.05 (m, 2H), 1.17 (d,  $J = 6.4$  Hz, 3H), 1.04 (d,  $J = 6.7$  Hz, 3H), 0.99 (d,  $J = 6.5$  Hz, 3H), 0.69 (d,  $J = 7.3$  Hz, 3H).;  $^{13}\text{C}$  NMR (126 MHz,  $\text{CDCl}_3$ )  $\delta$  156.17, 138.86, 129.16, 125.44, 123.35, 84.37, 64.26, 29.36, 27.27, 22.40, 20.00, 19.06, 16.77.; HRMS (ESI) exact mass calculated for  $[\text{M}+\text{Na}]^+$  ( $\text{C}_{15}\text{H}_{21}\text{NO}_2$ ) requires  $m/z$  247.15723, found  $m/z$  247.15677, difference 1.84 ppm.

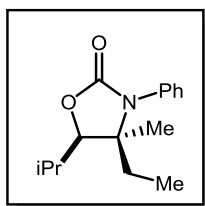

#### 4-Ethyl-5-isopropyl-4-methyl-3-phenyloxazolidin-2-one (13)

Followed general procedure with (*E*)-2,4,-Dimethylhex-4-en-3-yl phenylcarbamate (247 mg, 1 mmol) for 24 hours and purified using silica column chromatography (gradient 100% hexanes to 20% EtOAc/hexanes) to give 179 mg (72% yield) of the title compound as a 4:1 mixture of inseparable diastereomers. Diastereomeric assignments based on allylic strain considerations. IR (neat): 2972, 2880, 1749, 1598, 1499, 1473, 1378, 1285, 1224, 1166, 1071, 1035, 1006, 969, 766, 724, 698  $\text{cm}^{-1}$ ; Major diastereomer:  $^1\text{H}$  NMR (500 MHz,  $\text{CDCl}_3$ )  $\delta$  7.41 (t,  $J = 7.7$  Hz, 2H), 7.33 (q,  $J = 7.4$  Hz, 1H), 7.25 (d,  $J = 8.3$  Hz, 2H), 3.91 (d,  $J = 9.5$  Hz, 1H), 2.25 – 2.14 (m, 1H), 1.82 – 1.63 (m, 2H), 1.29 (s, 3H), 1.18 (d,  $J = 6.6$  Hz, 3H), 1.09 (t,  $J = 7.5$  Hz, 3H), 1.06 (d,  $J = 6.6$  Hz, 3H).;  $^{13}\text{C}$  NMR (126 MHz,  $\text{CDCl}_3$ )  $\delta$  157.13, 135.46, 129.39, 128.46, 127.79, 90.72, 66.03, 28.35, 28.12, 26.20, 20.31, 20.08, 9.36.; Minor diastereomer:  $^1\text{H}$  NMR (500 MHz,  $\text{CDCl}_3$ )  $\delta$  7.41 (t,  $J = 7.7$  Hz, 2H), 7.33 (q,  $J = 7.4$  Hz, 1H), 7.22 (d,  $J = 8.0$  Hz, 2H), 4.11 (d,  $J = 7.3$  Hz, 1H), 2.10 – 2.00 (m, 1H), 1.73 – 1.64 (m, 1H), 1.60 – 1.52 (m, 1H), 1.24 (s, 2H), 1.15 (d,  $J = 6.7$  Hz, 3H), 1.05 (d,  $J = 5.5$  Hz, 3H), 1.02 (t,  $J = 7.4$  Hz, 3H).;  $^{13}\text{C}$  NMR (126 MHz,  $\text{CDCl}_3$ )  $\delta$  157.41, 135.34, 129.12, 128.07, 127.79, 84.79, 66.13, 31.72, 29.10, 20.17, 19.94, 18.97, 8.33.; HRMS (ESI) exact mass calculated for  $[\text{M}+\text{H}]^+$  ( $\text{C}_{15}\text{H}_{21}\text{NO}_2$ ) requires  $m/z$  247.15723, found  $m/z$  247.15811, difference 1.1 ppm.

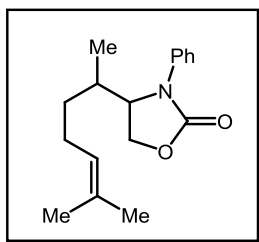

#### 4-(6-Methylhept-5-en-2-yl)-3-phenyloxazolidin-2-one (14)

Synthesized using the general procedure, stirring with irradiation for 12 hours. The product is purified by silica gel column chromatography (gradient from 0% EtOAc in Hexanes to 10% EtOAc in Hexanes) to afford the title compound as a 1:1 mixture of diastereomers. For the nerol-derived substrate, the yield was 233 mg (85% yield). For the geraniol-derived substrate, the yield was 246 mg (90% yield).

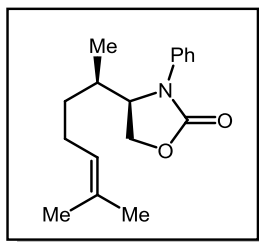

#### Top Diastereomer

The diastereomer with a higher  $R_f$  in 10% EtOAc in Hexanes is a colorless oil.

IR (neat) 2966, 2920, 1753, 1696, 1502, 1457, 1406, 1304, 1212, 1129, 1052, 958, 758, 694, 675  $\text{cm}^{-1}$ ;  $^1\text{H}$  NMR (500 MHz,  $\text{CDCl}_3$ )  $\delta$  7.46 – 7.43 (m, 2H), 7.39 (dd,  $J = 8.7, 7.2$  Hz, 2H), 7.19 (tt,  $J = 7.2, 1.3$  Hz, 1H), 5.04 (m, 1H), 4.51 (ddd,  $J = 8.8, 5.2, 3.4$  Hz, 1H), 4.40 (t,  $J = 8.9$  Hz, 1H), 4.23 (dd,  $J = 8.8, 5.1$  Hz, 1H), 2.13 – 1.89 (m, 3H), 1.69 (s, 3H), 1.59 (s, 3H), 1.33 – 1.18 (m, 2H), 0.84 (d,  $J = 6.8$  Hz, 3H);  $^{13}\text{C}$  NMR (126 MHz,  $\text{CDCl}_3$ )  $\delta$  156.16, 136.73, 132.63, 129.30, 125.31, 123.64, 122.13, 62.48, 59.24, 32.51, 25.85, 25.71, 17.91, 12.08; HRMS (ESI) exact mass calculated for  $[\text{M}+\text{H}]^+$  ( $\text{C}_{17}\text{H}_{23}\text{NO}_2$ ) requires  $m/z$  273.17288, found  $m/z$  273.17288 difference 0.01 ppm.

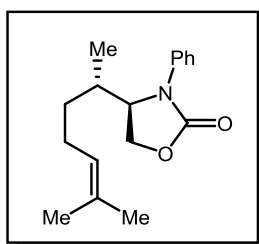

#### Bottom Diastereomer

The diastereomer with a lower  $R_f$  in 10% EtOAc in Hexanes is a white solid.

IR (neat) 2967, 2922, 1751, 1600, 1503, 1457, 1407, 1311, 1213, 1130, 1054, 989, 959, 759, 694, 675  $\text{cm}^{-1}$ ;  $^1\text{H}$  NMR (500 MHz,  $\text{CDCl}_3$ )  $\delta$  7.44 – 7.36 (m, 4H), 7.19 (tt,  $J = 7.1, 1.5$  Hz, 1H), 4.79 (ddt,  $J = 7.9, 6.4, 1.5$  Hz, 1H), 4.47 – 4.40 (m, 2H), 4.26 – 4.17 (m, 1H), 2.01 – 1.83 (m, 2H), 1.74 (m, 1H), 1.54 (s, 3H), 1.48 (s, 3H), 1.40 (m, 1H), 1.10 (m, 1H), 0.90 (d,  $J = 7.0$  Hz, 3H);  $^{13}\text{C}$  NMR (126 MHz,  $\text{CDCl}_3$ ) 156.33, 136.82, 132.37, 129.27, 125.58, 123.64, 122.78, 63.46, 60.84, 32.43, 28.83, 25.72, 25.31, 17.71, 15.15; HRMS (ESI) exact mass calculated for  $[\text{M}+\text{H}]^+$  ( $\text{C}_{17}\text{H}_{23}\text{NO}_2$ ) requires  $m/z$  273.17288, found  $m/z$  273.17331 difference 1.57 ppm.

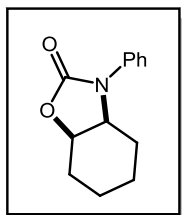

### 3-Phenylhexahydrobenzo[d]oxazol-2(3H)-one (15)

Synthesized using the general procedure, stirring with irradiation for 12 hours. The product is purified by silica gel column chromatography (gradient from 0% EtOAc in Hexanes to 25% EtOAc in Hexanes) to afford 191 mg (88% yield) of the title compound in >20:1 diastereoselectivity as a white solid. Major diastereomer:  $^1\text{H}$  NMR (500 MHz,  $\text{CDCl}_3$ )  $\delta$  7.48 (d,  $J = 8.0$  Hz, 2H), 7.37 (t,  $J = 7.8$  Hz, 2H), 7.15 (t,  $J = 7.4$  Hz, 1H), 4.67 (m, 1H), 4.27 (q,  $J = 6.6$  Hz, 1H), 2.18 – 2.08 (m, 1H), 2.08 – 1.96 (m, 1H), 1.81 (ddt,  $J = 15.1, 10.1, 4.9$  Hz, 1H), 1.67 – 1.51 (m, 4H), 1.29 (m, 1H). Spectral data is consistent with the reported literature spectra.<sup>28</sup>

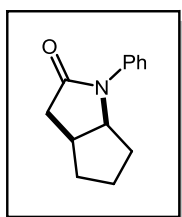

### 1-Phenylhexahydrocyclopenta[b]pyrrol-2(1H)-one (16)

Synthesized using the general procedure, stirring with irradiation for 12 hours. The product is purified by silica gel column chromatography (gradient from 0% EtOAc in Hexanes to 20% EtOAc in Hexanes) to afford 179 mg (89% yield) of the title compound in >20:1 diastereoselectivity as a white solid. Major diastereomer: IR (neat) 2955, 2867, 1691, 1598, 1498, 1387, 1309, 1295, 1282, 1231, 759, 694  $\text{cm}^{-1}$ ;  $^1\text{H}$  NMR (500 MHz,  $\text{CDCl}_3$ )  $\delta$  7.50 (d,  $J = 8.0$  Hz, 2H), 7.37 (t,  $J = 7.7$  Hz, 2H), 7.17 (t,  $J = 7.4$  Hz, 1H), 4.64 (m, 1H), 2.92 – 2.77 (m, 2H), 2.36 (dd,  $J = 17.1, 2.9$  Hz, 1H), 1.91 (m, 1H), 1.76 – 1.69 (m, 2H), 1.68 – 1.60 (m, 2H), 1.57 (m, 1H);  $^{13}\text{C}$  NMR (126 MHz,  $\text{CDCl}_3$ )  $\delta$  174.15, 138.34, 129.01, 125.28, 122.80, 65.19, 39.53, 34.33, 34.24, 32.40, 24.15; HRMS (ESI) exact mass calculated for  $[\text{M}+\text{H}]^+$  ( $\text{C}_{13}\text{H}_{15}\text{NO}$ ) requires  $m/z$  201.11536, found  $m/z$  201.11497 difference 1.98 ppm.

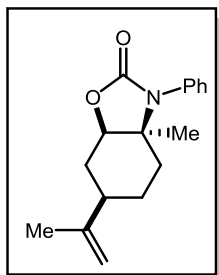

### (3a*S*,6*R*,7a*R*)-3a-Methyl-3-phenyl-6-(prop-1-en-2-yl)hexahydrobenzo[d]oxazol-2(3H)-one (17)

Followed general procedure with (1*R*,5*R*)-2-Methyl-5-(prop-1-en-2-yl)cyclohex-2-en-1-yl phenylcarbamate (272 mg, 1 mmol) for 18 hours and purified using silica column chromatography (gradient 100% hexanes to 33% EtOAc/hexanes) to give 240 mg (88% yield) of the title compound as a >20:1 mixture of diastereomers. Major diastereomer: IR (neat): 3071, 2934, 2860, 1742, 1645, 1597, 1496, 1453, 1440, 1366, 1339, 1266, 1223, 1193, 1163, 1147, 1062, 1005, 966, 889, 873, 764, 697, 685  $\text{cm}^{-1}$ ;  $^1\text{H}$  NMR (500 MHz,  $\text{CDCl}_3$ )  $\delta$  7.42 (t,  $J = 7.6$  Hz, 2H), 7.35 (t,  $J = 7.4$  Hz, 1H), 7.23 (d,  $J = 7.7$  Hz, 2H), 4.76 (d,  $J = 10.5$  Hz, 2H), 4.36 (dd,  $J = 9.9, 6.6$  Hz, 1H), 2.29 – 2.21 (m, 1H), 2.02 – 1.92 (m, 2H), 1.75 (s, 3H), 1.68 – 1.60 (m, 2H), 1.50 – 1.40 (m,

2H), 1.36 (s, 3H).;  $^{13}\text{C}$  NMR (126 MHz,  $\text{CDCl}_3$ )  $\delta$  157.44, 147.96, 135.07, 129.43, 128.82, 128.06, 109.91, 80.52, 62.18, 40.68, 34.24, 32.44, 26.67, 26.48, 20.86.; HRMS (ESI) exact mass calculated for  $[\text{M}+\text{H}]^+$  ( $\text{C}_{17}\text{H}_{21}\text{NO}_2$ ) requires  $m/z$  251.15273, found  $m/z$  271.15736, difference 0.48 ppm.

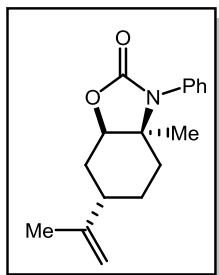

**(3a*S*,6*S*,7a*R*)-3a-Methyl-3-phenyl-6-(prop-1-en-2-yl)hexahydrobenzo[d]oxazol-2(3*H*)-one (18)**

Followed general procedure with (1*R*,5*S*)-2-Methyl-5-(prop-1-en-2-yl)cyclohex-2-en-1-yl phenylcarbamate (272 mg, 1 mmol) for 18 hours and purified using silica column chromatography (gradient 100% hexanes to 33% EtOAc/hexanes) to give 255 mg (94% yield) of the title compound as a >20:1 mixture of diastereomers. Major diastereomer: IR (neat): 2935, 2861, 1748, 1644, 1596, 1498, 1453, 1369, 1350, 1269, 1229, 1203, 1180, 1128, 1064, 1025, 977, 964, 888, 763, 697, 683  $\text{cm}^{-1}$ ;  $^1\text{H}$  NMR (500 MHz,  $\text{CDCl}_3$ )  $\delta$  7.40 (t,  $J = 7.6$  Hz, 2H), 7.32 (t,  $J = 7.4$  Hz, 1H), 7.25 (d,  $J = 7.9$  Hz, 2H), 4.76 (d,  $J = 17.5$  Hz, 2H), 4.41 – 4.36 (m, 1H), 2.38 – 2.28 (m, 2H), 1.95 – 1.84 (m, 2H), 1.82 – 1.76 (m, 1H), 1.75 (s, 3H), 1.67 – 1.58 (m, 1H), 1.31 (s, 3H), 1.24 – 1.13 (m, 1H).;  $^{13}\text{C}$  NMR (126 MHz,  $\text{CDCl}_3$ )  $\delta$  157.19, 148.30, 135.49, 129.29, 128.11, 127.71, 109.64, 80.94, 62.12, 38.16, 34.89, 30.78, 26.36, 21.94, 21.08.; HRMS (ESI) exact mass calculated for  $[\text{M}+\text{H}]^+$  ( $\text{C}_{17}\text{H}_{21}\text{NO}_2$ ) requires  $m/z$  251.15273, found  $m/z$  271.15705, difference 0.67 ppm.

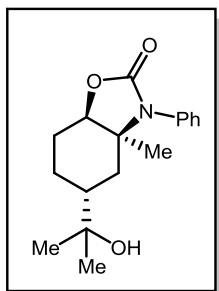

**5-(2-Hydroxypropan-2-yl)-3a-methyl-3-phenylhexahydrobenzo[d]oxazol-2(3*H*)-one (19)**

Synthesized using the general procedure, stirring with irradiation for 18 hours. The product is purified by silica gel column chromatography (gradient from 10% EtOAc in Hexanes to 70% EtOAc in Hexanes) to afford 267 mg (92% yield) of the title compound in >20:1 d.r. as a white solid. IR (neat) 3450, 2971, 1739, 1597, 1499, 1455, 1382, 1268, 1210, 1156, 1119, 1066, 972, 946, 837, 766, 699;  $^1\text{H}$  NMR (500 MHz,  $\text{CDCl}_3$ )  $\delta$  7.43 – 7.38 (m, 2H), 7.34 – 7.29 (m, 1H), 7.24 (m, 2H), 4.42 (t,  $J = 3.1$  Hz, 1H), 2.36 – 2.29 (m, 1H), 1.89 – 1.79 (m, 3H), 1.74 (m, 1H), 1.57 (m, 1H), 1.30 (s, 3H), 1.22 (d,  $J = 4.2$  Hz, 6H), 1.19 – 1.07 (m, 1H),  $^{13}\text{C}$  NMR (126 MHz,  $\text{CDCl}_3$ )  $\delta$  157.20, 135.52, 129.33, 128.16, 127.75, 81.15, 72.23, 62.06, 41.37, 34.37, 27.59, 27.24, 26.68, 22.55, 21.85; HRMS (ESI) exact mass calculated for  $[\text{M}+\text{H}]^+$  ( $\text{C}_{17}\text{H}_{23}\text{NO}_3$ ) requires  $m/z$  289.16779, found  $m/z$  289.16795 difference 0.55 ppm.

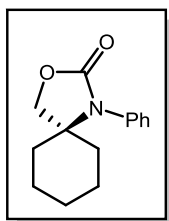

**1-Phenyl-3-oxa-1-azaspiro[4.5]decan-2-one (20)**

Followed general procedure, stirring for irradiation (232 mg, 1 mmol) for 18 hours and purified using silica column chromatography (gradient 100% hexanes to 33% EtOAc/hexanes) to give 200 mg (86% yield) of the title compound. IR (neat): 2933, 2858, 1752, 1701, 1596, 1543, 1497, 1452, 1394, 1340, 1311, 1285, 1220, 1168, 1130, 1060, 1037, 1009, 985, 956, 761, 728, 699, 684  $\text{cm}^{-1}$ ;  $^1\text{H}$  NMR (500 MHz,  $\text{CDCl}_3$ )  $\delta$  7.45 – 7.40 (m, 2H), 7.40 – 7.35 (m, 1H), 7.23 – 7.17 (m, 2H), 4.29 (s, 2H), 1.91 – 1.84 (m, 2H), 1.77 (dt,  $J = 14.2, 3.5$  Hz, 2H), 1.60 (dd,  $J = 12.9, 3.9$  Hz, 1H), 1.47 (td,  $J = 13.2, 4.0$  Hz, 2H), 1.28 (qt,  $J = 13.4, 3.5$  Hz, 2H), 1.01 – 0.89 (m, 1H).;  $^{13}\text{C}$  NMR (126 MHz,

CDCl<sub>3</sub>)  $\delta$  157.42, 134.75, 130.18, 129.37, 128.53, 72.33, 63.15, 35.05, 24.38, 22.95.; HRMS (ESI) exact mass calculated for [M+H]<sup>+</sup> (C<sub>14</sub>H<sub>17</sub>NO<sub>2</sub>) requires  $m/z$  231.12593, found  $m/z$  231.12626, difference 1.44 ppm.

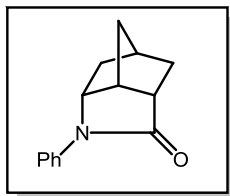

### 1-Phenylhexahydro-3,5-methanocyclopenta[b]pyrrol-2(1H)-one (21)

Synthesized using the general procedure, stirring with irradiation for 12 hours. The product is purified by silica gel column chromatography (gradient from 0% EtOAc in Hexanes to 20% EtOAc in Hexanes) to yield 194 mg (91% yield) of the title compound as a white solid in >20:1 diastereoselectivity. Major diastereomer: IR (neat) 2959, 2871, 1700, 1598, 1495, 1386, 1321, 1304, 1287, 1259, 1221, 1171, 1117, 1073, 1038, 758, 693 cm<sup>-1</sup>; <sup>1</sup>H NMR (500 MHz, CDCl<sub>3</sub>)  $\delta$  7.55 (dd,  $J$  = 8.7, 1.1 Hz, 1H), 7.35 (dd,  $J$  = 8.7, 7.3 Hz, 2H), 7.10 (tt,  $J$  = 7.2, 1.0 Hz, 1H), 4.12 (m, 1H), 3.08 (m, 1H), 2.61 (ddt,  $J$  = 11.1, 4.6, 1.7 Hz, 1H), 2.51 (m, 1H), 1.94 (dddd,  $J$  = 12.8, 11.1, 3.9, 2.8 Hz, 1H), 1.83 (dddd,  $J$  = 12.5, 8.2, 3.9, 2.7 Hz, 1H), 1.71-1.65 (m, 1H), 1.64 – 1.57 (m, 2H), 1.55 – 1.50 (m, 1H); <sup>13</sup>C NMR (126 MHz, CDCl<sub>3</sub>)  $\delta$  178.59, 139.29, 129.00, 123.98, 119.46, 60.79, 44.37, 44.34, 37.51, 37.41, 37.20, 34.75; HRMS (ESI) exact mass calculated for [M+H]<sup>+</sup> (C<sub>14</sub>H<sub>15</sub>NO) requires  $m/z$  213.11536, found  $m/z$  213.11525 difference 0.54 ppm.

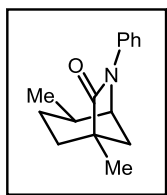

### 1,4-Dimethyl-6-phenyl-6-azabicyclo[3.2.1]octan-7-one (22)

Synthesized using the general procedure, stirring with irradiation for 16 hours. The product is purified by silica gel column chromatography (gradient from 0% EtOAc in Hexanes to 10% EtOAc in Hexanes) to afford 200 mg (87% yield) of the title compound as a white solid as a 5:1 mixture of diastereomers. N.B., *trans*- and *cis*- labels refer to the relative stereochemistry of the methyl groups on the cyclohexane core respectively.

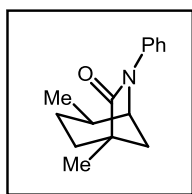

#### *Trans*-1,4-dimethyl-6-phenyl-6-azabicyclo[3.2.1]octan-7-one (22 major)

##### Major Diastereomer:

IR (neat) 3064, 2961, 2927, 2871, 1684, 1595, 1503, 1491, 1456, 1397, 1378, 1342, 1323, 1307, 1296, 1272, 1255, 1213, 1157, 1113, 1091, 1061, 1039, 910, 781, 763, 745, 694, 669 cm<sup>-1</sup>; <sup>1</sup>H NMR (500 MHz, CDCl<sub>3</sub>)  $\delta$  7.60 (dd,  $J$  = 8.8, 1.1 Hz, 2H), 7.36 – 7.31 (m, 2H), 7.10 (tt,  $J$  = 7.4, 1.1 Hz, 1H), 4.28 (d,  $J$  = 5.8 Hz, 1H), 2.18 (ddd,  $J$  = 10.8, 5.9, 2.6 Hz, 1H), 1.85 – 1.72 (m, 3H), 1.68 (d,  $J$  = 10.7 Hz, 1H), 1.53 – 1.35 (m, 2H), 1.17 (s, 3H), 0.69 (d,  $J$  = 6.8 Hz, 3H); <sup>13</sup>C NMR (126 MHz, CDCl<sub>3</sub>)  $\delta$  177.53, 140.11, 128.99, 124.58, 122.00, 61.23, 44.47, 44.14, 34.76, 34.57, 28.29, 21.23, 20.54; HRMS (ESI) exact mass calculated for [M+H]<sup>+</sup> (C<sub>15</sub>H<sub>19</sub>NO) requires  $m/z$  229.14666, found  $m/z$  229.14634 difference 1.40 ppm.

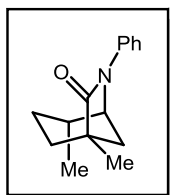

#### *Cis*-1,4-dimethyl-6-phenyl-6-azabicyclo[3.2.1]octan-7-one (22 minor)

##### Minor Diastereomer:

IR (neat) 2960, 2928, 2870, 1699, 1598, 1495, 1457, 1386, 1320, 1259, 1236, 1211, 1151, 1109, 1087, 1062, 993, 911, 879, 765, 754, 691; <sup>1</sup>H NMR (500 MHz,

CDCl<sub>3</sub>) δ 7.69 (dd, *J* = 8.8, 1.2 Hz, 2H), 7.35 (dd, *J* = 8.7, 7.3 Hz, 2H), 7.13 – 7.08 (m, 1H), 4.13 – 4.02 (m, 1H), 2.20 (pd, *J* = 7.1, 3.3 Hz, 1H), 1.97 (d, *J* = 11.2 Hz, 1H), 1.90 – 1.83 (m, 1H), 1.79 – 1.67 (m, 1H), 1.61 – 1.52 (m, 2H), 1.46 – 1.39 (m, 1H), 1.18 (s, 3H), 1.09 (d, *J* = 7.2 Hz, 3H); <sup>13</sup>C NMR (126 MHz, CDCl<sub>3</sub>) δ 177.52, 138.84, 129.14, 124.14, 120.06, 61.01, 44.86, 36.74, 30.42, 26.72, 25.35, 21.59, 17.01; HRMS (ESI) exact mass calculated for [M+H]<sup>+</sup> (C<sub>15</sub>H<sub>19</sub>NO) requires *m/z* 229.14666, found *m/z* 229.14643 difference 1.03 ppm.

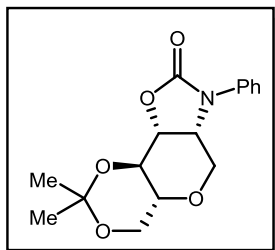

**(4aR,6aR,9aR,9bS)-2,2-Dimethyl-7-phenylhexahydro-[1,3]dioxino[4',5':5,6]pyrano[3,4-d]oxazol-8(6H)-one (23)**

Followed general procedure with 2,2-Dimethyl-4,4a,8,8a-tetrahydropyrano[3,2-*d*][1,3]dioxin-8-ylphenylcarbamate (305 mg, 1 mmol) for 18 hours and purified using silica column chromatography (gradient 100% hexanes to 33% EtOAc/hexanes) to give 232 mg (78% yield) of the title compound as a >20:1 mixture of diastereomers. Major diastereomer: IR (neat): 2995, 2890, 1764, 1749, 1597, 1504, 1492, 1453, 1383, 1328, 1317, 1275, 1263, 1201, 1168, 1123, 1103, 1085, 1043, 1025, 996, 977, 952, 920, 845, 794, 767, 754, 732, 695, 661 cm<sup>-1</sup>; <sup>1</sup>H NMR (500 MHz, CDCl<sub>3</sub>) δ 7.44 (t, *J* = 7.7 Hz, 2H), 7.30 (t, *J* = 7.5 Hz, 1H), 7.25 (d, *J* = 7.9 Hz, 2H), 4.65 (t, *J* = 7.6 Hz, 1H), 4.41 (dd, *J* = 7.6, 2.7 Hz, 1H), 4.15 (d, *J* = 13.8 Hz, 1H), 4.02 – 3.96 (m, 1H), 3.94 (dd, *J* = 10.9, 5.5 Hz, 1H), 3.76 (t, *J* = 10.5 Hz, 1H), 3.68 (dd, *J* = 13.9, 2.9 Hz, 1H), 3.20 (td, *J* = 10.1, 5.5 Hz, 1H), 1.55 (s, 3H), 1.45 (s, 3H); <sup>13</sup>C NMR (126 MHz, CDCl<sub>3</sub>) δ 156.68, 135.68, 129.68, 127.33, 125.18, 100.37, 74.16, 72.83, 70.37, 64.57, 62.01, 57.66, 29.14, 19.24.; HRMS (ESI) exact mass calculated for [M+H]<sup>+</sup> (C<sub>20</sub>H<sub>26</sub>NO<sub>6</sub>) requires *m/z* 305.12632, found *m/z* 305.12625, difference 0.23 ppm.

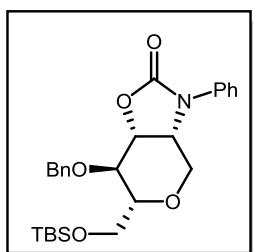

**(3aR,6R,7S,7aR)-7-(Benzyloxy)-6-(((tert-butyl)dimethylsilyl)oxy)methyl)-3-phenylhexahydro-2H-pyrano[3,4-d]oxazol-2-one (24)**

Followed general procedure with (2*R*,3*S*,4*R*)-3-(benzyloxy)-2-(((tert-butyl)dimethylsilyl)oxy)methyl)-3,4-dihydro-2*H*-pyran-4-yl phenylcarbamate (470 mg, 1 mmol) for 18 hours and purified using silica column chromatography (gradient 100% hexanes to 33% EtOAc/hexanes) to give 440 mg (94% yield) of the title compound as a >20:1 mixture of diastereomers. Major diastereomer: IR (neat): 2952, 2928, 2856, 1755, 1599, 1502, 1471, 1456, 1388, 1340, 1254, 1207, 1155, 1099, 1042, 1004, 974, 945, 835, 814, 775, 755, 695, 671 cm<sup>-1</sup>; <sup>1</sup>H NMR (500 MHz, CDCl<sub>3</sub>) δ 7.31 (t, *J* = 7.8 Hz, 2H), 7.27 – 7.19 (m, 7H), 7.19 – 7.12 (m, 1H), 4.75 (dd, *J* = 8.1, 5.5 Hz, 1H), 4.71 (d, *J* = 11.3 Hz, 1H), 4.60 (d, *J* = 11.3 Hz, 1H), 4.34 (d, *J* = 7.8 Hz, 1H), 3.91 (d, *J* = 13.4 Hz, 1H), 3.83 (t, *J* = 6.1 Hz, 1H), 3.72 (d, *J* = 4.6 Hz, 2H), 3.56 (dd, *J* = 13.5, 2.5 Hz, 1H), 3.41 (q, *J* = 4.8 Hz, 1H), 0.80 (s, 9H), -0.03 (d, *J* = 3.0 Hz, 6H); <sup>13</sup>C NMR (126 MHz, CDCl<sub>3</sub>) δ 156.05, 137.78, 135.94, 129.54, 128.64, 128.10, 127.99, 126.52, 123.91, 79.20, 75.63, 74.22, 73.34, 63.30, 63.12, 56.71, 26.05, 18.50, -5.08, -5.18.; HRMS (ESI) exact mass calculated for [M+H]<sup>+</sup> (C<sub>26</sub>H<sub>35</sub>NO<sub>5</sub>Si) requires *m/z* 469.22845, found *m/z* 469.22794, difference 1.09 ppm.

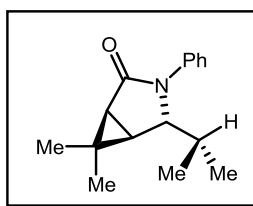

**4-Isopropyl-6,6-dimethyl-3-phenyl-3-azabicyclo[3.1.0]hexan-2-one (25)**

Synthesized using the general procedure, stirring with irradiation for 16 hours. The product is purified by silica gel column chromatography (gradient from 0% EtOAc in Hexanes to 15% EtOAc in Hexanes) to afford 165 mg (68%) of the title compound as a white solid in >20:1 diastereoselectivity. IR (neat) 3044, 2960, 2928, 2875, 1687, 1599, 1498, 1458, 1385, 1354, 1319, 1290, 1216, 1195, 1150, 1120, 1074, 1039, 1018, 992, 949, 901, 875, 857, 832, 809, 759, 695, 681  $\text{cm}^{-1}$ ;  $^1\text{H}$  NMR (500 MHz,  $\text{CDCl}_3$ )  $\delta$  7.39 – 7.31 (m, 4H), 7.16 (tt,  $J = 6.8, 1.9$  Hz, 1H), 3.95 – 3.92 (m, 1H), 1.99 (m, 1H), 1.95 (dd,  $J = 6.6, 1.9$  Hz, 1H), 1.48 (d,  $J = 6.5$  Hz, 1H), 1.17 (s, 3H), 1.16 (s, 3H), 0.96 (d,  $J = 7.1$  Hz, 3H), 0.83 (d,  $J = 6.9$  Hz, 3H);  $^{13}\text{C}$  NMR (126 MHz,  $\text{CDCl}_3$ )  $\delta$  172.16, 137.25, 129.05, 125.56, 123.81, 62.91, 134.32, 28.62, 26.18, 25.00, 22.06, 18.06, 15.11, 14.59; HRMS (ESI) exact mass calculated for  $[\text{M}+\text{H}]^+$  ( $\text{C}_{16}\text{H}_{22}\text{NO}$ ) requires  $m/z$  243.16231, found  $m/z$  243.16273 difference 1.7 ppm.

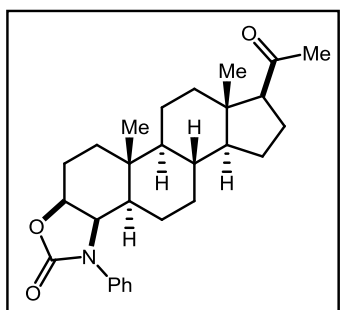

**(3a*S*,5a*R*,5b*S*,7a*S*,8*S*,10a*S*,10b*R*,12b*R*)-8-Acetyl-5a,7a-dimethyl-1-phenylhexadecahydro-1H-cyclopenta[7,8]phenanthro[1,2-*d*]oxazol-2(12b*H*)-one (26)**

Followed general procedure with (3*S*,8*S*,9*S*,10*R*,13*S*,14*S*,17*S*)-17-acetyl-10,13-dimethyl-2,3,6,7,8,9,10,11,12,13,14,15,16,17-tetradecahydro-1*H*-cyclopentaphenanthren-3-yl phenylcarbamate (436 mg, 1 mmol) for 18 hours and purified using silica column chromatography (gradient 100% hexanes to 33% EtOAc/hexanes) to give 410 mg (94% yield) of the title compound as a >20:1 mixture of diastereomers. Major diastereomer: IR (neat): 2938, 2871, 1749, 1700, 1597, 1498, 1454, 1401, 1382, 1355, 1314, 1293, 1199, 1152, 1113, 1082, 1056, 1005, 969, 941, 787, 762, 734, 713, 696, 666  $\text{cm}^{-1}$ ;  $^1\text{H}$  NMR (500 MHz,  $\text{CDCl}_3$ )  $\delta$  7.39 (t,  $J = 7.6$  Hz, 2H), 7.30 (t,  $J = 7.9$  Hz, 3H), 4.66 – 4.60 (m, 1H), 4.47 (dd,  $J = 7.3, 3.6$  Hz, 1H), 2.47 (t,  $J = 8.7$  Hz, 1H), 2.15 – 2.05 (m, 2H), 2.09 (s, 3H), 2.03 – 1.89 (m, 2H), 1.83 (dt,  $J = 13.9, 4.5$  Hz, 1H), 1.62 – 1.50 (m, 4H), 1.43 – 1.32 (m, 2H), 1.32 – 1.24 (m, 1H), 1.20 (qd,  $J = 12.2, 10.8, 3.7$  Hz, 1H), 1.14 – 1.02 (m, 4H), 1.07 (s, 3H), 0.86 (qd,  $J = 13.1, 3.7$  Hz, 1H), 0.75 – 0.60 (m, 2H), 0.54 (s, 3H);  $^{13}\text{C}$  NMR (126 MHz,  $\text{CDCl}_3$ )  $\delta$  209.58, 159.09, 139.63, 129.24, 127.60, 126.77, 73.96, 63.78, 61.97, 56.52, 54.87, 47.74, 44.18, 38.97, 35.42, 35.29, 34.26, 32.79, 31.62, 27.42, 24.96, 24.36, 22.86, 20.78, 14.28, 13.50; HRMS (ESI) exact mass calculated for  $[\text{M}+\text{H}]^+$  ( $\text{C}_{28}\text{H}_{37}\text{NO}_3$ ) requires  $m/z$  435.27734, found  $m/z$  435.27763, difference 0.65 ppm.

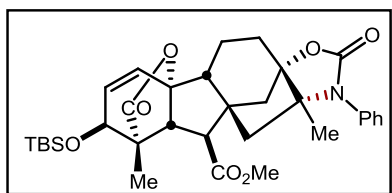

**Methyl (3a*S*,4a*S*,5*S*,5a*R*,6*S*,7*S*,9a*R*,9b*R*,11a*S*)-7-((tert-butylidimethylsilyl)oxy)-3a,6-dimethyl-2,14-dioxo-3-phenyl-2,3,3a,4,5,5a,6,7,9b,10-decahydro-11*H*-9a,6-(epoxymethano)-4a,11a-methanobenzo[1,2]azuleno[5,6-*d*]oxazole-5-carboxylate (27)**

Followed general procedure with (1*S*,2*S*,4a*R*,4b*R*,7*S*,9a*S*,10*S*,10a*R*)-methyl 2-((tert-butylidimethylsilyl)oxy)-1-methyl-8-methylene-13-oxo-7-((phenylcarbamoyl)oxy)-1,2,4b,5,6,7,8,9,10,10a-decahydro-4a,1-(epoxymethano)-7,9a-methanobenzo[*a*]azulene-10-carboxylate (594 mg, 1 mmol) for 36 hours and purified using alumina column chromatography (gradient 100% hexanes to 33% EtOAc/hexanes) to give 403 mg (68% yield) of the title compound as a >20:1 mixture of diastereomers. Major diastereomer: IR (neat): 2954, 2885,

2858, 2253, 1739, 1598, 1500, 1454, 1374, 1356, 1329, 1256, 1222, 1203, 1160, 1143, 1134, 1070, 1044, 1024, 1003, 987, 972, 944, 910, 865, 837, 805, 778, 760, 727, 697, 669  $\text{cm}^{-1}$ ;  $^1\text{H}$  NMR (500 MHz,  $\text{CDCl}_3$ )  $\delta$  7.38 (t,  $J = 7.7$  Hz, 2H), 7.29 (t,  $J = 7.4$  Hz, 1H), 7.24 (d,  $J = 7.9$  Hz, 2H), 6.20 (d,  $J = 9.4$  Hz, 1H), 5.76 (dd,  $J = 9.3, 3.8$  Hz, 1H), 4.08 (d,  $J = 3.8$  Hz, 1H), 3.64 (s, 3H), 3.28 (d,  $J = 11.3$  Hz, 1H), 2.84 (d,  $J = 11.3$  Hz, 1H), 2.30 – 2.17 (m, 3H), 2.17 – 2.07 (m, 1H), 2.07 – 1.97 (m, 2H), 1.91 (d,  $J = 13.1$  Hz, 1H), 1.81 (td,  $J = 8.2, 4.2$  Hz, 1H), 1.50 (dd,  $J = 13.1, 2.6$  Hz, 1H), 1.39 (s, 3H), 1.13 (s, 3H), 0.89 (s, 9H), 0.07 (d,  $J = 4.9$  Hz, 6H).;  $^{13}\text{C}$  NMR (126 MHz,  $\text{CDCl}_3$ )  $\delta$  178.36, 171.80, 155.07, 135.98, 133.49, 131.14, 129.51, 127.55, 127.04, 90.48, 87.01, 69.93, 69.82, 54.32, 52.43, 52.23, 51.29, 51.13, 50.80, 47.61, 42.06, 25.74, 25.55, 23.78, 18.11, 16.26, 15.23, -4.00, -4.80.; HRMS (ESI) exact mass calculated for  $[\text{M}+\text{H}]^+$  ( $\text{C}_{33}\text{H}_{43}\text{NO}_7\text{Si}$ ) requires  $m/z$  593.28088, found  $m/z$  593.28102, difference 0.24 ppm.

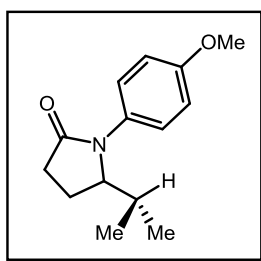

### 5-Isopropyl-1-(4-methoxyphenyl)pyrrolidin-2-one (28)

Synthesized using the general procedure, stirring with irradiation for 12 hours. The product is purified by silica gel column chromatography (gradient from 0% EtOAc in Hexanes to 35% EtOAc in Hexanes) to yield 203 mg (87% yield) of the title compound as a white solid. IR (neat) 2961, 1688, 1610, 1512, 1466, 1443, 1398, 1328, 1291, 1247, 1179, 1102, 1033, 832  $\text{cm}^{-1}$ ;  $^1\text{H}$  NMR (500 MHz,  $\text{CDCl}_3$ )  $\delta$  7.26 – 7.22 (m, 2H), 6.95 – 6.87 (m, 2H), 4.12 (ddd,  $J = 8.6, 5.0, 3.4$  Hz, 1H), 3.79 (s, 3H), 2.62 – 2.45 (m, 2H), 2.10 (dddd,  $J = 13.3, 10.0, 8.6, 7.3$  Hz, 1H), 1.95 (m, 1H), 1.88 (m, 1H), 0.88 (d,  $J = 7.0$  Hz, 3H), 0.75 (d,  $J = 6.8$  Hz, 3H);  $^{13}\text{C}$  NMR (126 MHz,  $\text{CDCl}_3$ )  $\delta$  174.79, 157.72, 130.55, 126.25, 114.44, 64.88, 55.56, 31.54, 28.51, 18.57, 17.87, 14.37; HRMS (ESI) exact mass calculated for  $[\text{M}+\text{H}]^+$  ( $\text{C}_{14}\text{H}_{19}\text{NO}_2$ ) requires  $m/z$  233.14158, found  $m/z$  233.14137 difference 0.90 ppm.

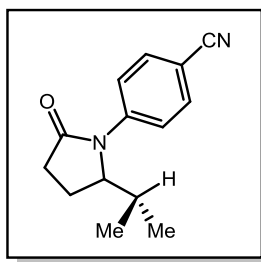

### 4-(2-Isopropyl-5-oxopyrrolidin-1-yl)benzonitrile (29)

Synthesized using the general procedure, stirring with irradiation for 36 hours. The product is purified by silica gel column chromatography (gradient from 0% EtOAc in Hexanes to 35% EtOAc in Hexanes) to yield 183 mg (80% yield) of the title compound as a white solid. IR (neat) 2964, 2225, 1698, 1602, 1508, 1469, 1420, 1384, 1357, 1322, 1296, 1220, 1179, 1163, 1097, 1015, 962, 905, 841, 668  $\text{cm}^{-1}$ ;  $^1\text{H}$  NMR (500 MHz,  $\text{CDCl}_3$ )  $\delta$  7.70 – 7.64 (m, 2H), 7.61 – 7.57 (m, 2H), 4.36 – 4.29 (m, 1H), 2.73 – 2.51 (m, 2H), 2.15 (m, 1H), 2.07 (m, 1H), 1.94 (m, 1H), 4.34 – 4.30 (m, 1H), 0.94 (d,  $J = 7.0$  Hz, 3H), 0.72 (d,  $J = 6.8$  Hz, 3H);  $^{13}\text{C}$  NMR (126 MHz,  $\text{CDCl}_3$ )  $\delta$  174.90, 141.96, 133.10, 123.50, 118.82, 108.47, 63.47, 31.87, 28.43, 18.59, 17.60, 14.42; HRMS (ESI) exact mass calculated for  $[\text{M}+\text{H}]^+$  ( $\text{C}_{14}\text{H}_{16}\text{N}_2\text{O}$ ) requires  $m/z$  228.12626, found  $m/z$  228.12631 difference 0.20 ppm.

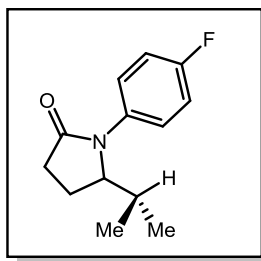

### 1-(4-Fluorophenyl)-5-isopropylpyrrolidin-2-one (30)

Synthesized using the general procedure, stirring with irradiation for 12 hours. The product is purified by silica gel column chromatography (gradient from 0% EtOAc in Hexanes to 25% EtOAc in Hexanes) to yield



195 mg (88% yield) of the title compound as a white solid. IR (neat) 2963, 2876, 1689, 1601, 1507, 1468, 1422, 1392, 1326, 1293, 1229, 1216, 1159, 1110, 1094, 1014, 961, 905, 835, 815, 728  $\text{cm}^{-1}$ ;  $^1\text{H}$  NMR (500 MHz,  $\text{CDCl}_3$ )  $\delta$  7.34 – 7.29 (m, 2H), 7.12 – 7.04 (m, 2H), 4.17 (ddd,  $J$  = 8.6, 5.1, 3.6 Hz, 1H), 2.63 – 2.47 (m, 2H), 2.12 (dddd,  $J$  = 13.3, 10.0, 8.5, 7.1 Hz, 1H), 2.02 – 1.85 (m, 2H), 0.89 (d,  $J$  = 7.0 Hz, 3H), 0.74 (d,  $J$  = 6.8 Hz, 3H);  $^{13}\text{C}$  NMR (126 MHz,  $\text{CDCl}_3$ )  $\delta$  174.78, 160.54 (d,  $J$  = 245.6 Hz), 133.69 (d,  $J$  = 3.1 Hz), 126.39 (d,  $J$  = 8.3 Hz), 115.98 (d,  $J$  = 22.5 Hz), 64.63, 31.54, 28.45, 18.54, 17.84, 14.36;  $^{19}\text{F}$  NMR (282 MHz,  $\text{CDCl}_3$ ) -116.43 (m); HRMS (ESI) exact mass calculated for  $[\text{M}+\text{H}]^+$  ( $\text{C}_{13}\text{H}_{16}\text{FNO}$ ) requires  $m/z$  221.12159, found  $m/z$  221.12131 difference 1.26 ppm.

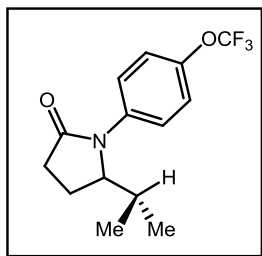

### 5-Isopropyl-1-(4-(trifluoromethoxy)phenyl)pyrrolidin-2-one (31)

Synthesized using the general procedure, stirring with irradiation for 12 hours. The product is purified by silica gel column chromatography (gradient from 0% EtOAc in Hexanes to 25% EtOAc in Hexanes) to yield 260 mg (91% yield) of the title compound as a white solid. IR (neat) 2966, 1695, 1608, 1509, 1469, 1426, 1392, 1328, 1253, 1221, 1162, 1115, 1017, 922, 906, 851, 809, 663  $\text{cm}^{-1}$ ;  $^1\text{H}$  NMR (500 MHz,  $\text{CDCl}_3$ )  $\delta$  7.45 – 7.37 (m, 2H), 7.25 – 7.21 (m, 2H), 4.23 (ddd,  $J$  = 8.6, 5.0, 3.6 Hz, 1H), 2.64 – 2.49 (m, 2H), 2.13 (dddd,  $J$  = 13.4, 10.4, 8.6, 7.1 Hz, 1H), 2.01 (ddq,  $J$  = 10.5, 6.9, 3.5 Hz, 1H), 1.92 (dddd,  $J$  = 13.5, 10.0, 6.5, 5.0 Hz, 1H), 0.91 (d,  $J$  = 7.1 Hz, 3H), 0.74 (d,  $J$  = 6.9 Hz, 4H);  $^{13}\text{C}$  NMR (126 MHz,  $\text{CDCl}_3$ )  $\delta$  174.64, 146.46 (q,  $J$  = 1.9 Hz), 136.19, 125.45, 121.62, 120.44 (q,  $J$  = 257.2 Hz), 64.15, 31.51, 28.28, 18.43, 17.62, 14.23;  $^{19}\text{F}$  NMR (282 MHz,  $\text{CDCl}_3$ )  $\delta$  -58.48; HRMS (ESI) exact mass calculated for  $[\text{M}+\text{H}]^+$  ( $\text{C}_{14}\text{H}_{16}\text{F}_3\text{NO}_2$ ) requires  $m/z$  287.11331, found  $m/z$  287.11276 difference 1.93 ppm.

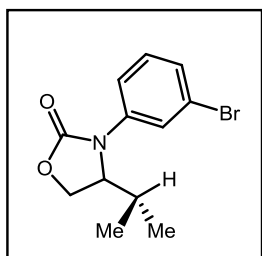

### 3-(3-Bromophenyl)-4-isopropylloxazolidin-2-one (32)

Followed general procedure with 3-methylbut-2-en-1-yl (3-bromophenyl)carbamate (284 mg, 1 mmol) for 36 hours and purified using silica column chromatography (gradient 100% hexanes to 33% EtOAc/hexanes) to give 261 mg (92% yield) of the title compound. IR (neat): 2963, 2931, 2875, 1744, 1590, 1568, 1479, 1434, 1402, 1391, 1350, 1321, 1270, 1204, 1147, 1117, 1092, 1073, 1055, 994, 968, 871, 837, 776, 755, 738, 705, 682  $\text{cm}^{-1}$ ;  $^1\text{H}$  NMR (500 MHz,  $\text{CDCl}_3$ )  $\delta$  7.65 (s, 1H), 7.41 (dd,  $J$  = 8.1, 2.1 Hz, 1H), 7.30 (d,  $J$  = 7.9 Hz, 1H), 7.28 – 7.22 (m, 1H), 4.44 – 4.37 (m, 2H), 4.27 – 4.20 (m, 1H), 2.14 (pd,  $J$  = 7.0, 2.8 Hz, 1H), 0.92 (d,  $J$  = 7.0 Hz, 3H), 0.84 (d,  $J$  = 6.8 Hz, 3H);  $^{13}\text{C}$  NMR (126 MHz,  $\text{CDCl}_3$ )  $\delta$  155.69, 138.27, 130.53, 128.26, 124.82, 122.89, 120.45, 62.57, 60.38, 27.59, 17.82, 14.29.; HRMS (ESI) exact mass calculated for  $[\text{M}+\text{H}]^+$  ( $\text{C}_{12}\text{H}_{14}\text{BrNO}_2$ ) requires  $m/z$  283.02079, found  $m/z$  283.02075, difference 0.15 ppm.

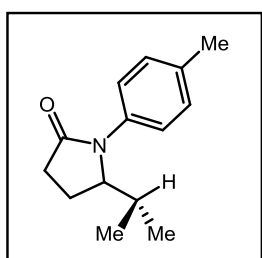

### 5-Isopropyl-1-(p-tolyl)pyrrolidin-2-one (33)

Synthesized using the general procedure, stirring with irradiation for 12 hours. The product is purified by silica gel column chromatography

(gradient from 0% EtOAc in Hexanes to 25% EtOAc in Hexanes) to yield 202 mg (93% yield) of the title compound as a white solid. IR (neat) 2962, 1692, 1514, 1468, 1392, 1326, 1292, 1225, 1162, 1102, 819  $\text{cm}^{-1}$ ;  $^1\text{H}$  NMR (500 MHz,  $\text{CDCl}_3$ )  $\delta$  7.23 (d,  $J = 8.4$  Hz, 2H), 7.19 (d,  $J = 8.5$  Hz, 2H), 4.18 (ddd,  $J = 8.6, 5.0, 3.5$  Hz, 1H), 2.64 – 2.47 (m, 2H), 2.34 (s, 3H), 2.10 (dddd,  $J = 13.2, 10.0, 8.6, 7.2$  Hz, 1H), 1.98 (pd,  $J = 6.9, 3.5$  Hz, 1H), 1.89 (dddd,  $J = 13.2, 9.8, 6.5, 5.0$  Hz, 1H), 0.88 (d,  $J = 7.0$  Hz, 3H), 0.75 (d,  $J = 6.8$  Hz, 3H);  $^{13}\text{C}$  NMR (126 MHz,  $\text{CDCl}_3$ )  $\delta$  174.73, 135.90, 135.11, 129.76, 124.67, 64.59, 31.70, 28.49, 21.18, 18.61, 17.84, 14.39; HRMS (ESI) exact mass calculated for  $[\text{M}+\text{H}]^+$  ( $\text{C}_{14}\text{H}_{19}\text{NO}$ ) requires  $m/z$  217.14666, found  $m/z$  217.14645 difference 1.00 pm.

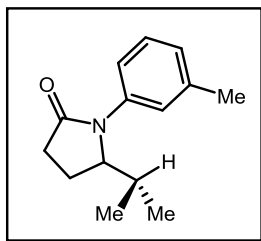

#### 5-Isopropyl-1-(*m*-tolyl)pyrrolidin-2-one (34)

Synthesized using the general procedure, stirring with irradiation for 12 hours. The product is purified by silica gel column chromatography (gradient from 0% EtOAc in Hexanes to 25% EtOAc in Hexanes) to yield 191 mg (88%) of the title compound as a white solid. IR (neat) 2962, 1694, 1606, 1588, 1492, 1466, 1391, 1327, 1237, 1185, 1106, 785, 696  $\text{cm}^{-1}$ ;  $^1\text{H}$  NMR (500 MHz,  $\text{CDCl}_3$ )  $\delta$  7.26 (m, 1H), 7.18 (s, 1H), 7.13 – 7.10 (m, 1H), 7.02 (m, 1H), 4.20 (ddd,  $J = 8.6, 4.9, 3.5$  Hz, 1H), 2.64 – 2.46 (m, 2H), 2.36 (s, 3H), 2.11 (dddd,  $J = 13.2, 10.1, 8.6, 7.2$  Hz, 1H), 1.99 (pd,  $J = 6.9, 3.5$  Hz, 1H), 1.89 (dddd,  $J = 13.3, 9.9, 6.5, 5.0$  Hz, 1H), 0.89 (d,  $J = 6.9$  Hz, 3H), 0.76 (d,  $J = 6.8$  Hz, 3H);  $^{13}\text{C}$  NMR (126 MHz,  $\text{CDCl}_3$ )  $\delta$  174.72, 139.02, 137.66, 128.92, 127.02, 125.56, 121.76, 64.62, 31.78, 28.50, 21.65, 18.64, 17.82, 14.42; HRMS (ESI) exact mass calculated for  $[\text{M}+\text{H}]^+$  ( $\text{C}_{14}\text{H}_{19}\text{NO}$ ) requires  $m/z$  217.14666, found  $m/z$  217.14648 difference 0.83 ppm.

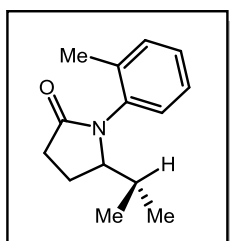

#### 5-Isopropyl-1-(*o*-tolyl)pyrrolidin-2-one (35)

Synthesized using the general procedure, stirring with irradiation for 12 hours. The product is purified by silica gel column chromatography (gradient from 0% EtOAc in Hexanes to 25% EtOAc in Hexanes) to yield 188 mg (87% yield) of the title compound as a white solid. IR (neat) 2962, 1693, 1604, 1581, 1495, 1462, 1393, 1325, 1277, 1225, 1199, 1165, 764, 725, 666; N.B. product is a 1:1 mixture of rotamers at RT in  $\text{CDCl}_3$  and was characterized at high temperature in DMSO,  $^1\text{H}$  NMR (500 MHz,  $\text{DMSO}-d_6$  at 120  $^\circ\text{C}$ )  $\delta$  7.31 – 7.10 (m, 4H), 4.02 (m, 1H), 2.41 (m, 2H), 2.20 (obscured, s, 3H), 2.28 – 2.07 (m, 1H), 1.99 – 1.70 (m, 2H), 0.83 (dd,  $J = 6.8, 2.6$  Hz, 6H);  $^{13}\text{C}$  NMR (75 MHz,  $\text{DMSO}-d_6$  at 120  $^\circ\text{C}$ )  $\delta$  172.86, 136.81, 134.98, 130.03, 126.35, 126.11, 125.31, 64.23, 29.64, 28.51, 18.56, 17.73, 17.06, 14.64; HRMS (ESI) exact mass calculated for  $[\text{M}+\text{H}]^+$  ( $\text{C}_{14}\text{H}_{19}\text{NO}$ ) requires  $m/z$  217.14666, found  $m/z$  217.14635 difference 1.44 ppm.

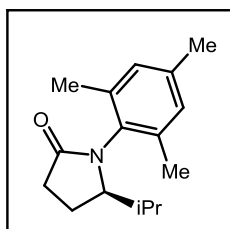

#### 5-Isopropyl-1-mesitylpyrrolidin-2-one (36)

Synthesized using the general procedure, stirring with irradiation for 12 hours. The product is purified by silica gel column chromatography (gradient from 0% EtOAc in Hexanes to 30% EtOAc in Hexanes) to afford 201 mg (82% yield) of the title compound as a colorless oil. IR (neat) 2960,

1693, 1609, 1485, 1325, 1280, 1248, 1223, 1165, 1096, 1034, 851, 668;  $^1\text{H}$  NMR (500 MHz,  $\text{CDCl}_3$ )  $\delta$  6.91 (s, 1H), 6.89 (s, 1H), 3.76 (dt,  $J = 8.3, 4.3$  Hz, 1H), 2.67 – 2.44 (m, 2H), 2.26 (s, 3H), 2.22 (s, 3H), 2.16 (s, 3H), 2.02 – 1.93 (m, 1H), 1.77 (heptet of d,  $J = 6.8, 3.8$  Hz, 1H), 0.95 (d,  $J = 6.7$  Hz, 3H), 0.78 (d,  $J = 6.9$  Hz, 3H);  $^{13}\text{C}$  NMR (126 MHz,  $\text{CDCl}_3$ )  $\delta$  174.99, 137.64, 137.24, 134.93, 133.25, 129.76, 129.68, 66.22, 31.17, 30.48, 21.05, 21.01, 20.22, 19.07, 18.50, 16.78; HRMS (ESI) exact mass calculated for  $[\text{M}+\text{H}]^+$  ( $\text{C}_{16}\text{H}_{23}\text{NO}$ ) requires  $m/z$  245.17796, found  $m/z$  245.17779 difference 0.71 ppm.

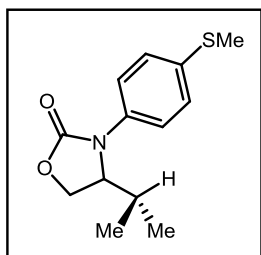

#### 4-Isopropyl-3-(4-(methylthio)phenyl)oxazolidin-2-one (37)

Synthesized using the general procedure, stirring with irradiation for 12 hours. The product is purified by silica gel column chromatography (gradient from 0% EtOAc in Hexanes to 20% EtOAc in Hexanes) to yield 225 mg (90% yield) of the title compound as a white solid. IR (neat) 2962, 2922, 2875, 1740, 1596, 1496, 1414, 1400, 1392, 1320, 1308, 1288, 1266, 1210, 1148, 1120, 1094, 1054, 996, 960, 819, 756, 722, 706;

$^1\text{H}$  NMR (500 MHz,  $\text{CDCl}_3$ )  $\delta$  7.37 (d,  $J = 8.2$  Hz, 2H), 7.27 (d,  $J = 8.5$  Hz, 2H), 4.48 – 4.32 (m, 2H), 4.22 (dd,  $J = 6.9, 3.0$  Hz, 1H), 2.47 (s, 3H), 2.10 (m, 1H), 0.89 (d,  $J = 7.0$  Hz, 3H), 0.83 (d,  $J = 6.7$  Hz, 3H);  $^{13}\text{C}$  NMR (126 MHz,  $\text{CDCl}_3$ )  $\delta$  156.12, 135.33, 134.17, 127.77, 122.94, 62.63, 60.66, 27.71, 17.81, 16.39, 14.35; HRMS (ESI) exact mass calculated for  $[\text{M}+\text{Na}]^+$  ( $\text{C}_{13}\text{H}_{17}\text{NO}_2\text{S}$ ) requires  $m/z$  251.09800, found  $m/z$  251.09783 difference 0.67 ppm.

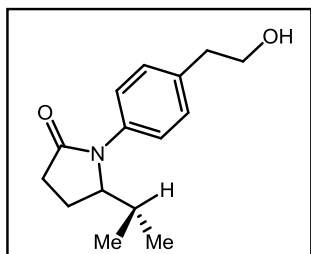

#### 1-(4-(2-Hydroxyethyl)phenyl)-5-isopropylpyrrolidin-2-one (38)

Synthesized using the general procedure, stirring with irradiation for 12 hours. The product is purified by silica gel column chromatography (gradient from 10% EtOAc in Hexanes to 80% EtOAc in Hexanes) to yield 222 mg (90% yield) of the title compound as a yellow oil. IR (neat) 3390, 2961, 2874, 1672, 1610, 1514, 1468, 1399, 1330, 1293, 1228, 1164, 1103, 1049, 963, 827,

668;  $^1\text{H}$  NMR (500 MHz,  $\text{CDCl}_3$ )  $\delta$  7.30 (d,  $J = 8.4$  Hz, 2H), 7.25 (d,  $J = 8.9$  Hz, 2H), 4.20 (m, 1H), 3.85 (q,  $J = 6.3$  Hz, 2H), 2.85 (t,  $J = 6.5$  Hz, 2H), 2.67 – 2.44 (m, 2H), 2.12 (m, 1H), 1.99 (pd,  $J = 6.9, 3.5$  Hz, 1H), 1.90 (m, 1H), 1.47 (m, 1H), 0.89 (d,  $J = 7.0$  Hz, 3H), 0.75 (d,  $J = 6.7$  Hz, 3H);  $^{13}\text{C}$  NMR (126 MHz,  $\text{CDCl}_3$ )  $\delta$  174.78, 136.39, 136.12, 129.78, 124.85, 64.51, 63.69, 38.89, 31.72, 28.46, 18.60, 17.78, 14.37; HRMS (ESI) exact mass calculated for  $[\text{M}+\text{H}]^+$  ( $\text{C}_{15}\text{H}_{22}\text{NO}_2$ ) requires  $m/z$  247.15723, found  $m/z$  247.15722 difference 0.02 ppm.

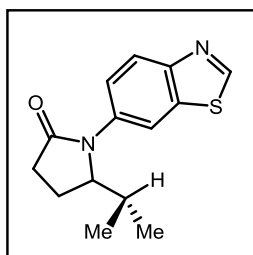

#### 1-(Benzo[d]thiazol-6-yl)-5-isopropylpyrrolidin-2-one (39)

Followed general procedure with N-(Benzo[d]thiazol-6-yl)-5-methylhex-4-enamide (260 mg, 1 mmol) for 18 hours and purified using alumina column chromatography (gradient 100% hexanes to 33% EtOAc/hexanes) to give 234 mg (90% yield) of the title compound. IR (neat): 3059, 2961, 2873, 1682, 1599, 1555, 1469, 1447, 1414, 1385, 1357, 1322, 1311, 1288,

1252, 1223, 1198, 1162, 1105, 960, 915, 877, 836, 808, 731, 700, 670  $\text{cm}^{-1}$ ;  $^1\text{H}$  NMR (500 MHz,  $\text{CDCl}_3$ )  $\delta$  8.97 (s, 1H), 8.13 (d,  $J = 8.8$  Hz, 1H), 8.07 (d,  $J = 1.8$  Hz, 1H), 7.46 (dd,  $J = 8.6$  Hz, 1H), 4.34 – 4.29 (m, 1H), 2.68 – 2.53 (m, 2H), 2.22 – 2.11 (m, 1H), 2.07 – 1.98 (m, 1H), 1.98 –

1.89 (m, 1H), 0.91 (d,  $J = 7.0$  Hz, 3H), 0.76 (d,  $J = 6.8$  Hz, 3H).;  $^{13}\text{C}$  NMR (126 MHz,  $\text{CDCl}_3$ )  $\delta$  174.91, 154.34, 151.19, 135.41, 134.54, 123.84, 122.76, 118.20, 64.72, 31.72, 28.56, 18.58, 17.80, 14.42.; HRMS (ESI) exact mass calculated for  $[\text{M}+\text{H}]^+$  ( $\text{C}_{11}\text{H}_{14}\text{N}_2\text{O}_2$ ) requires  $m/z$  260.09833, found  $m/z$  260.09784, difference 1.89 ppm.

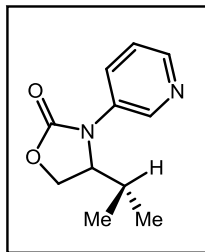

#### 4-Isopropyl-3-(pyridin-3-yl)oxazolidin-2-one (40)

Followed general procedure with 3-methylbut-2-en-1-yl pyridin-3-ylcarbamate (206 mg, 1 mmol) for 36 hours and purified using alumina column chromatography (gradient 100% hexanes to 50% EtOAc/hexanes) to give 182 mg (88% yield) of the title compound. IR (neat): 2957, 2889, 1729, 1584, 1484, 1466, 1415, 1392, 1368, 1320, 1312, 1296, 1223, 1193, 1157, 1119, 1105, 1053, 1043, 1011, 996, 955, 924, 912, 835, 809, 763, 752, 732, 707, 698  $\text{cm}^{-1}$ ;  $^1\text{H}$  NMR (500 MHz,  $\text{CDCl}_3$ )  $\delta$  8.62 (d,  $J = 2.7$  Hz, 1H), 8.39 (d,  $J = 4.7$  Hz, 1H), 7.97 (dd,  $J = 8.3, 3.3$  Hz, 1H), 7.31 (dd,  $J = 8.4, 4.7$  Hz, 1H), 4.52 – 4.38 (m, 2H), 4.26 (dd,  $J = 7.2, 2.9$  Hz, 1H), 2.13 (pd,  $J = 7.0, 3.1$  Hz, 1H), 0.90 (d,  $J = 7.0$  Hz, 3H), 0.82 (d,  $J = 6.8$  Hz, 3H).;  $^{13}\text{C}$  NMR (126 MHz,  $\text{CDCl}_3$ )  $\delta$  155.81, 146.04, 142.75, 133.76, 129.23, 123.84, 62.86, 59.89, 27.56, 17.71, 14.19.; HRMS (ESI) exact mass calculated for  $[\text{M}+\text{H}]^+$  ( $\text{C}_{11}\text{H}_{14}\text{N}_2\text{O}_2$ ) requires  $m/z$  206.10553, found  $m/z$  206.10593, difference 1.95 ppm.

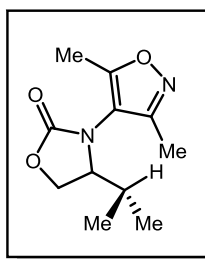

#### 3-(3,5-Dimethylisoxazol-4-yl)-4-isopropoxyloxazolidin-2-one (41)

Synthesized using the general procedure, stirring with irradiation for 12 hours. The product is purified by silica gel column chromatography (gradient from 0% EtOAc in Hexanes to 35% EtOAc in Hexanes) to yield 193 mg (86% yield) of the title compound as a yellow oil. IR (neat) 2968, 1756, 1648, 1508, 1467, 1406, 1323, 1257, 1217, 1125, 1051, 990, 956, 756;  $^1\text{H}$  NMR (500 MHz,  $\text{CDCl}_3$ )  $\delta$  4.45 (t,  $J = 9.0$  Hz, 1H), 4.23 (dd,  $J = 9.1, 5.9$  Hz, 1H), 4.01 (ddd,  $J = 9.2, 5.9, 3.7$  Hz, 1H), 2.37 (s, 3H), 2.24 (s, 3H), 1.84 (m, 1H), 0.92 (d,  $J = 6.8$  Hz, 3H), 0.88 (d,  $J = 7.0$  Hz, 3H);  $^{13}\text{C}$  NMR (126 MHz,  $\text{CDCl}_3$ )  $\delta$  165.39, 157.64, 156.52, 113.48, 64.13, 61.60, 28.94, 18.09, 15.05, 11.69, 10.42; HRMS (ESI) exact mass calculated for  $[\text{M}+\text{H}]^+$  ( $\text{C}_{11}\text{H}_{14}\text{N}_2\text{O}_2$ ) requires  $m/z$  206.10553, found  $m/z$  206.10593, difference 1.95 ppm.

### $^1\text{H}$ and $^{13}\text{C}$ NMR Spectra of Products

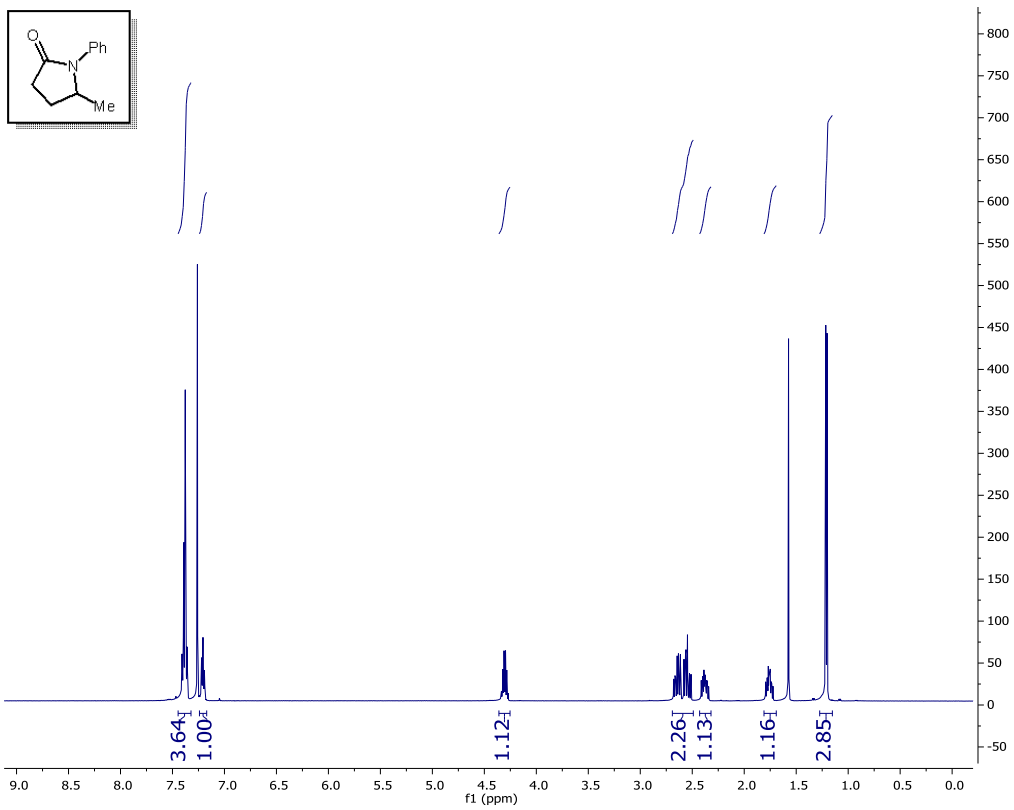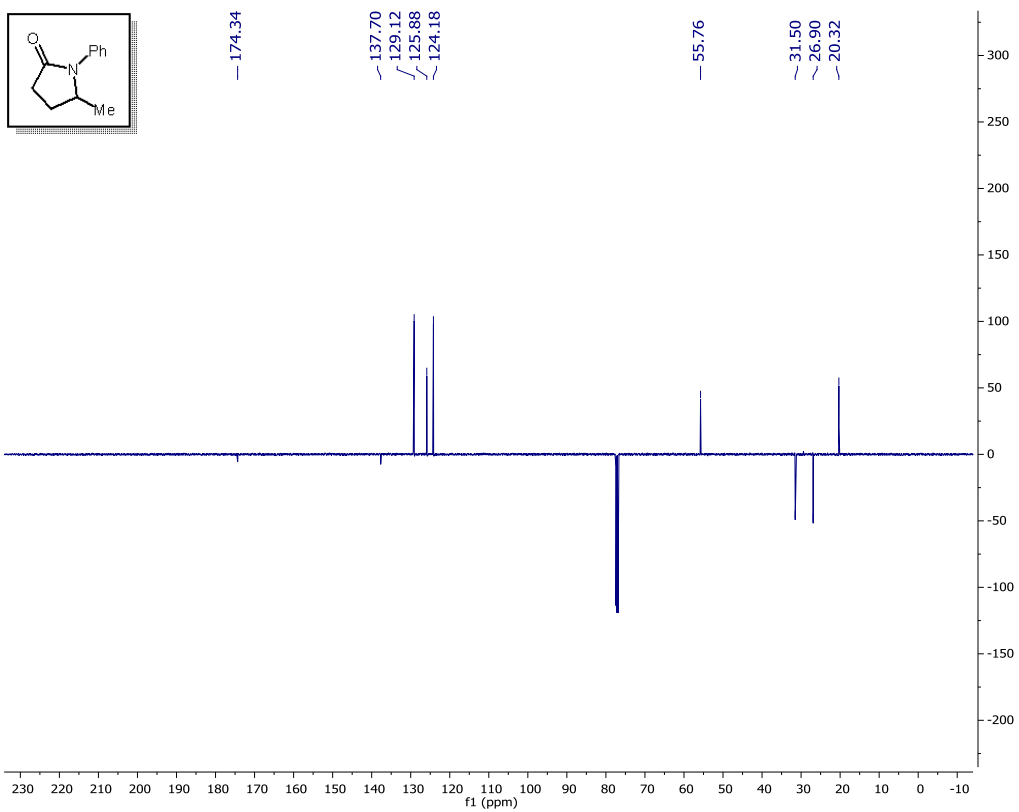

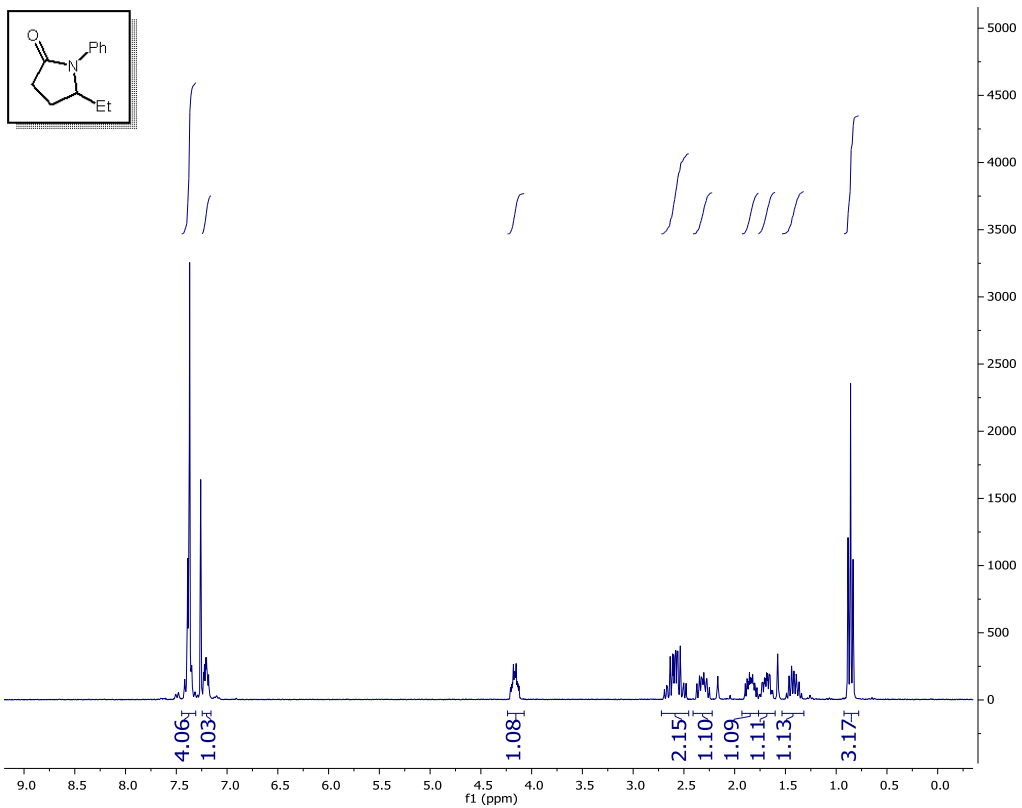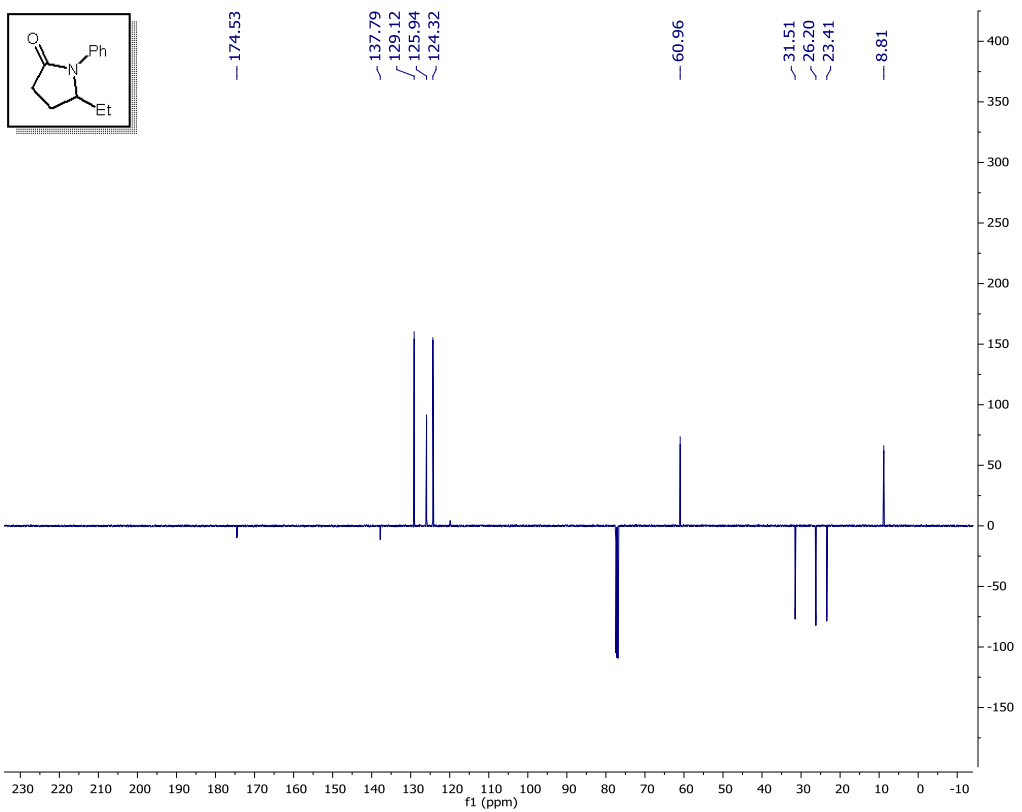

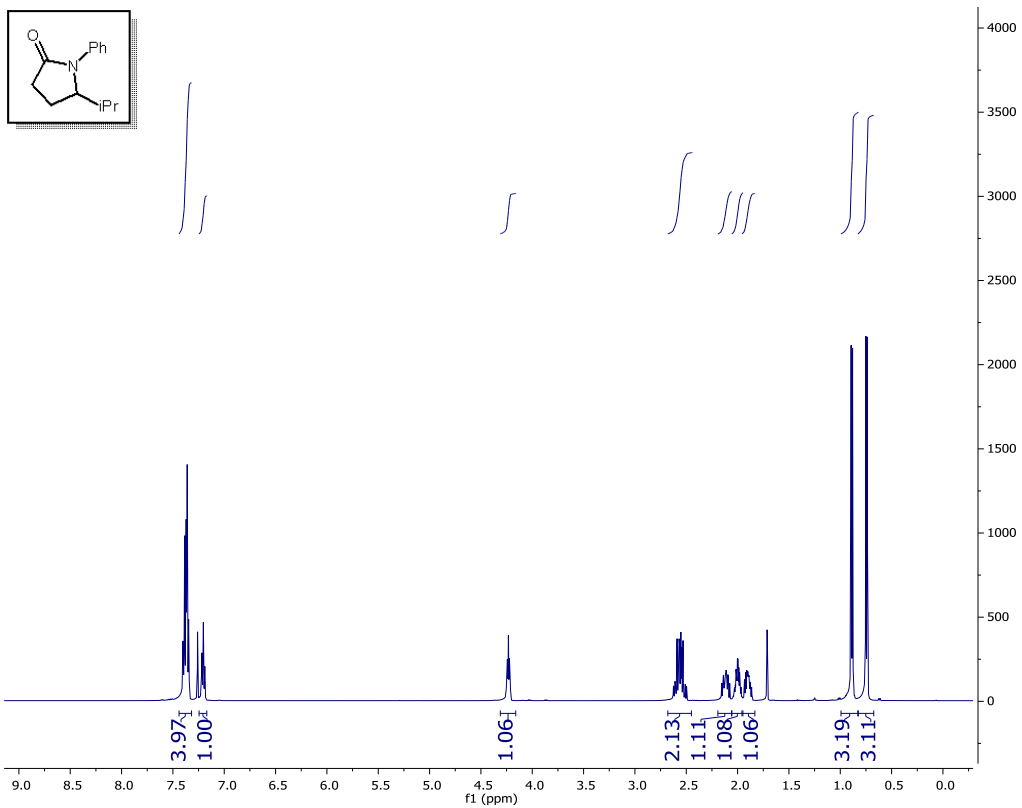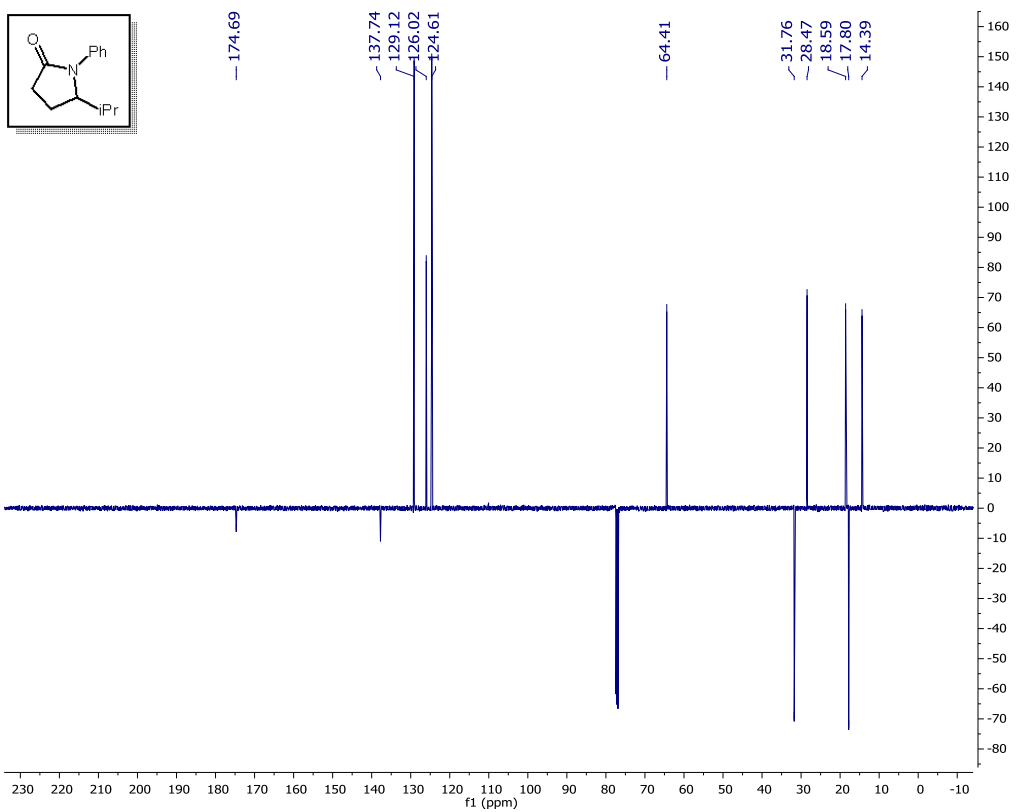

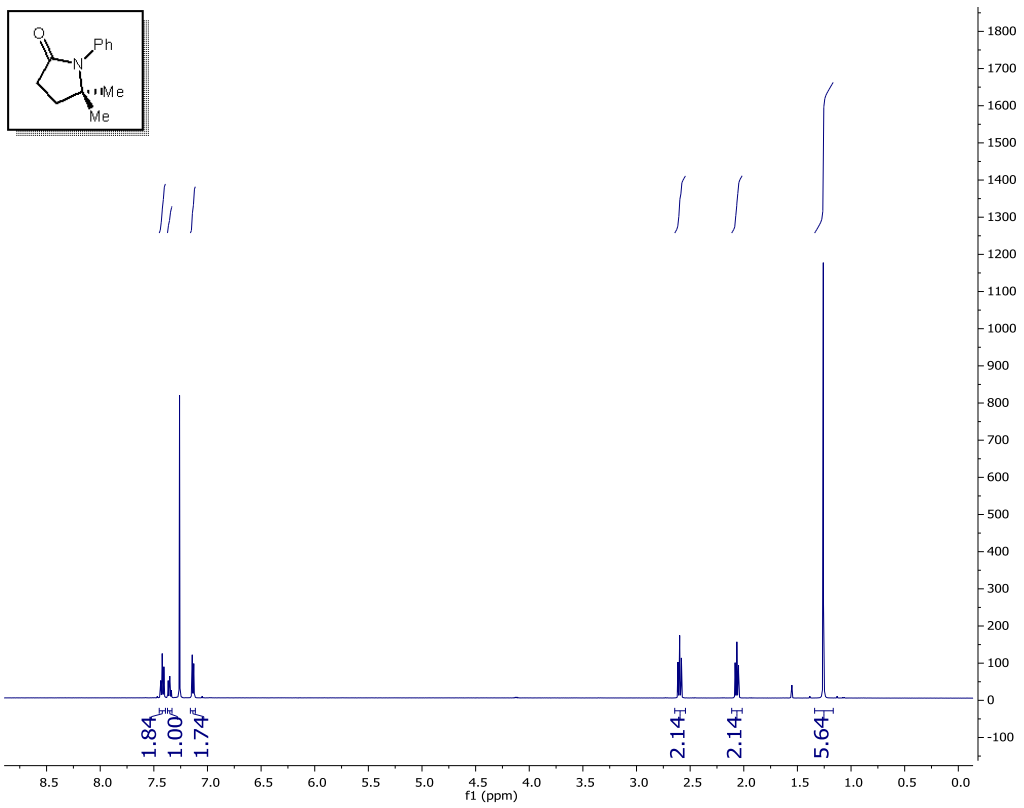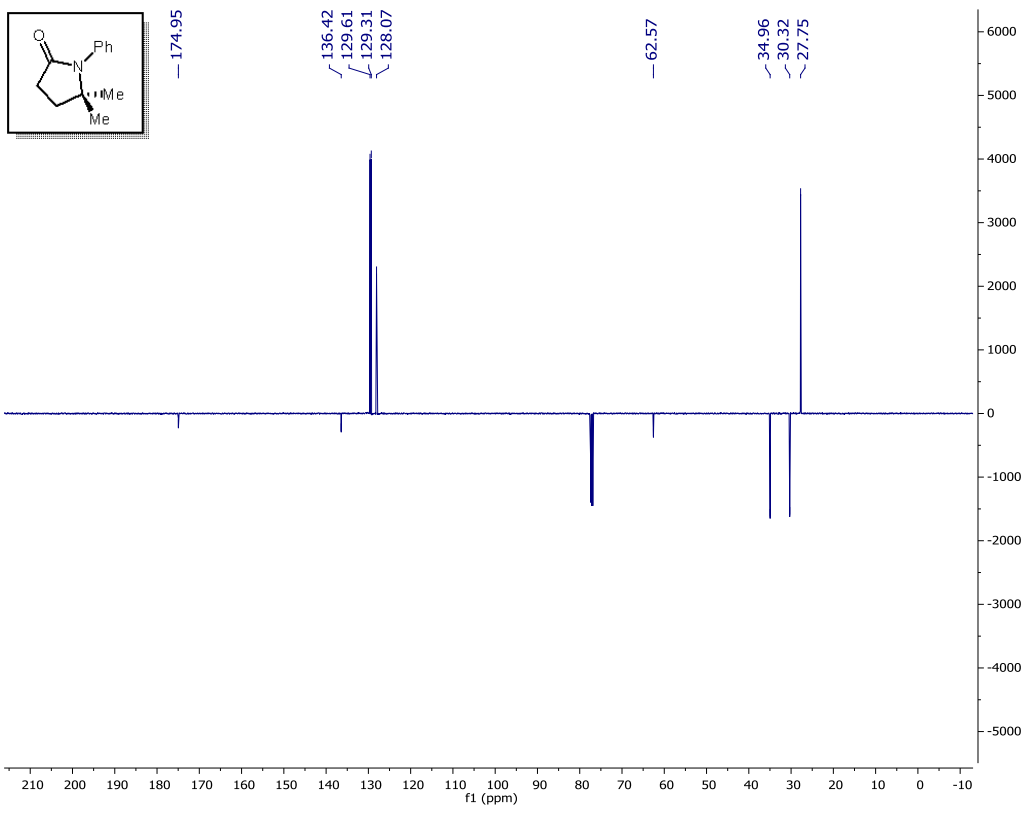



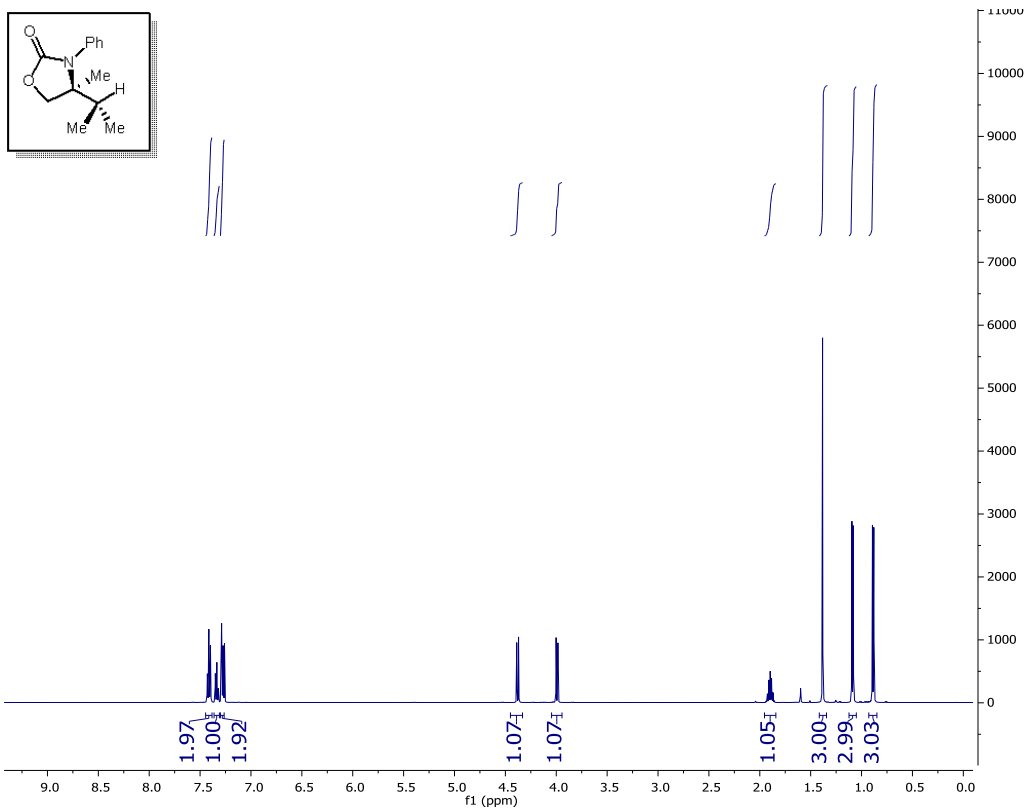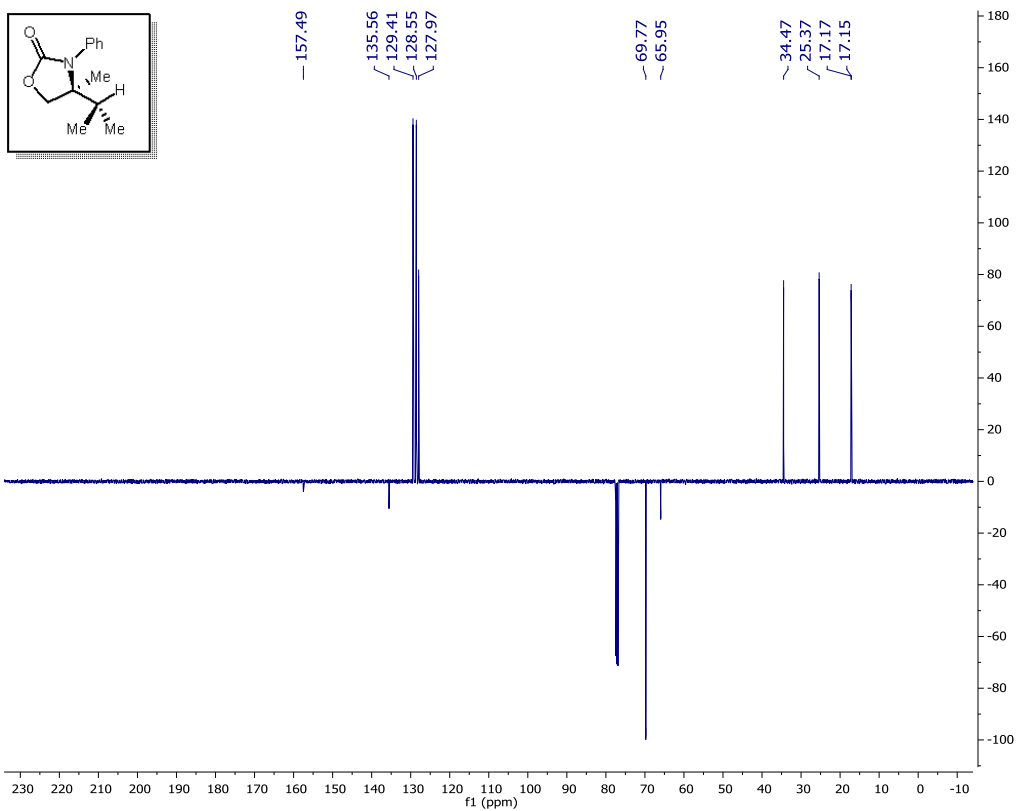

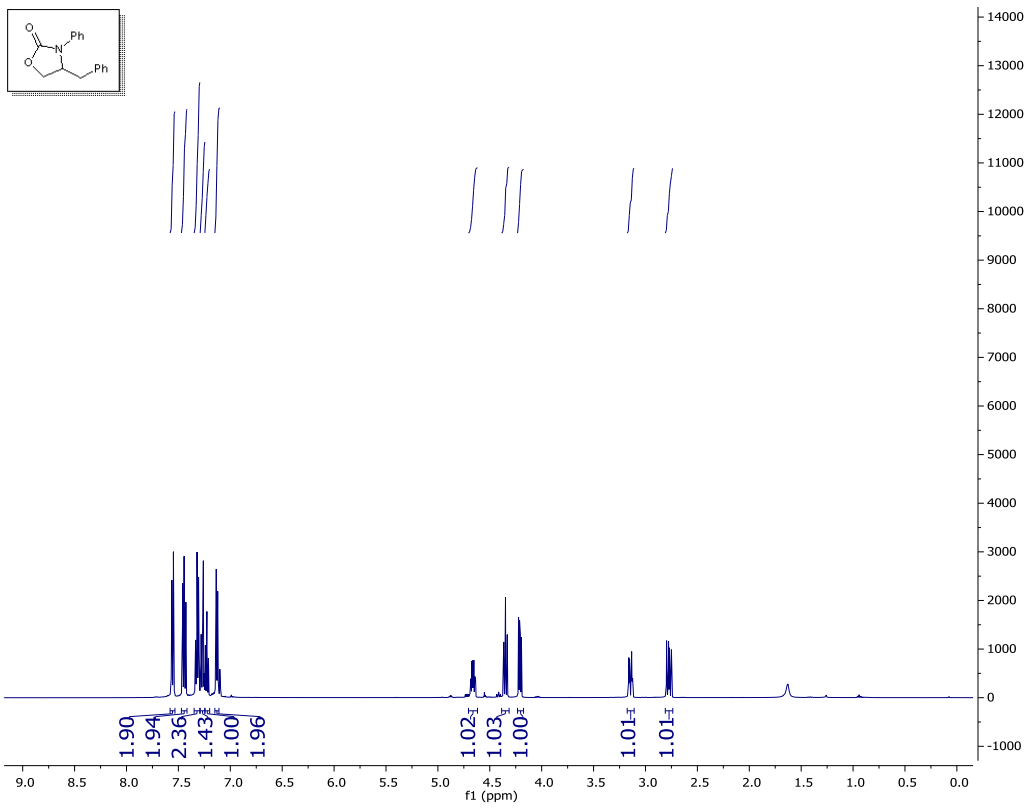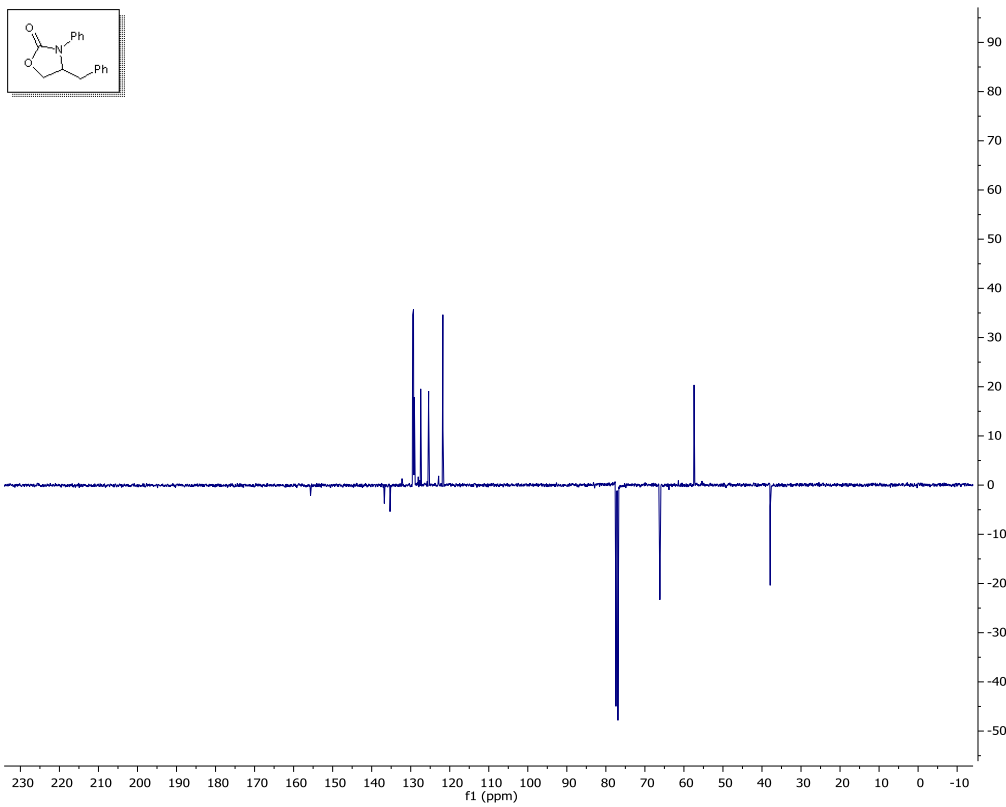

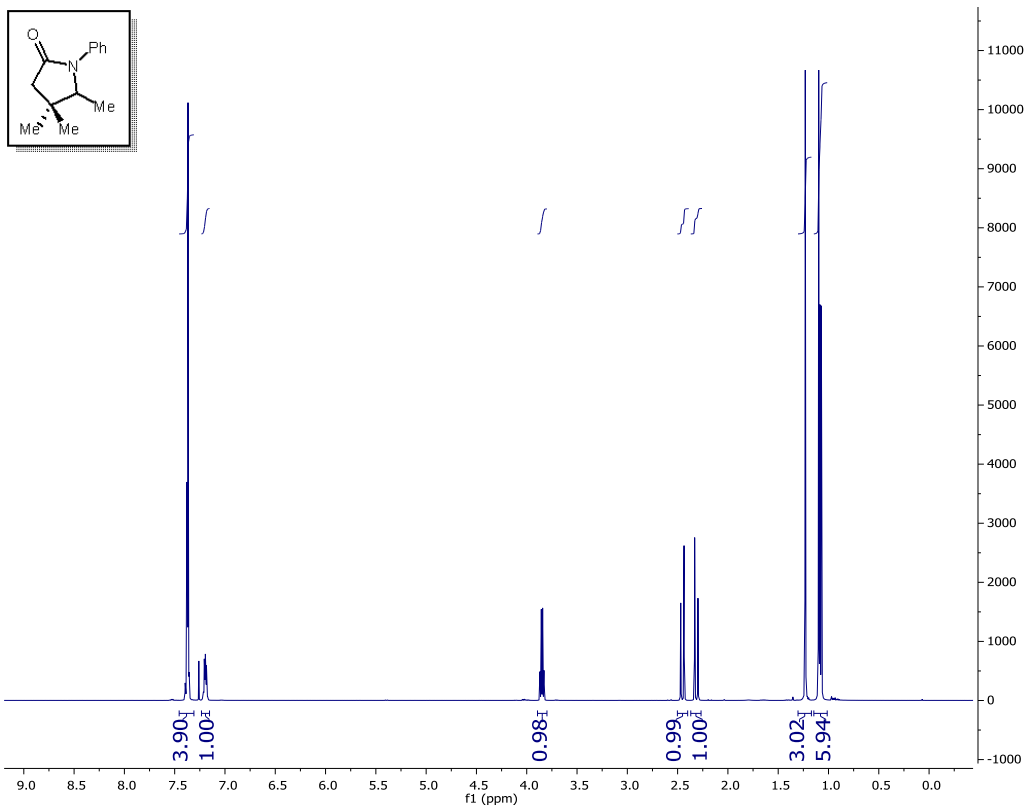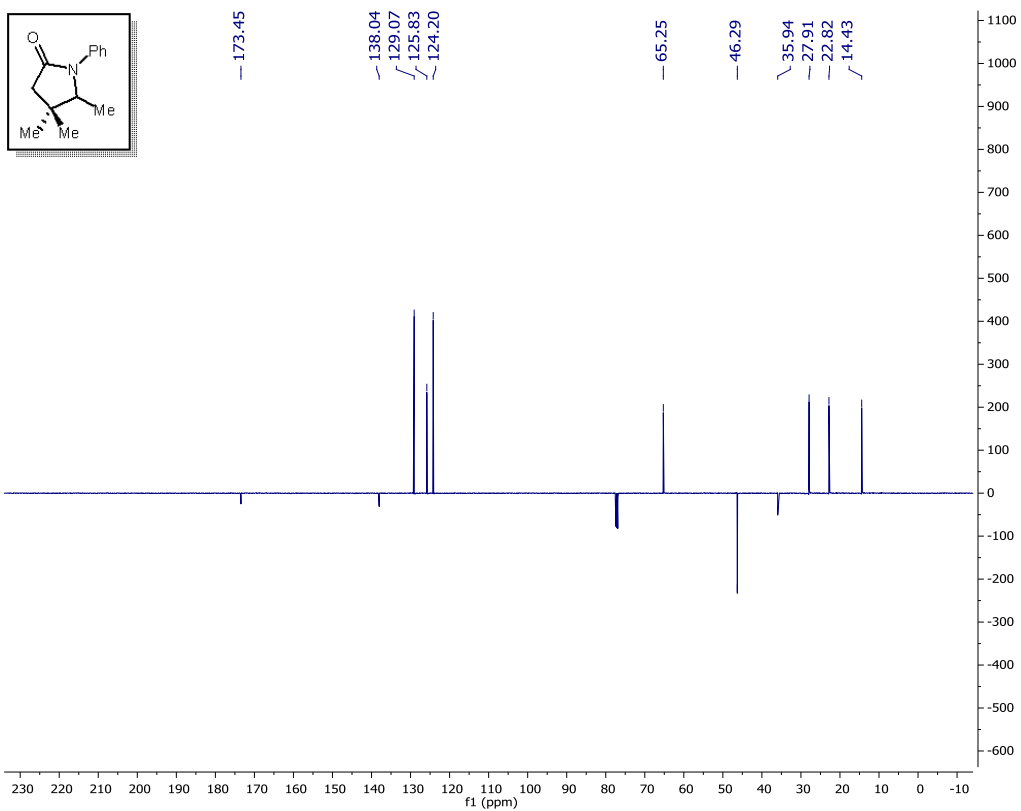

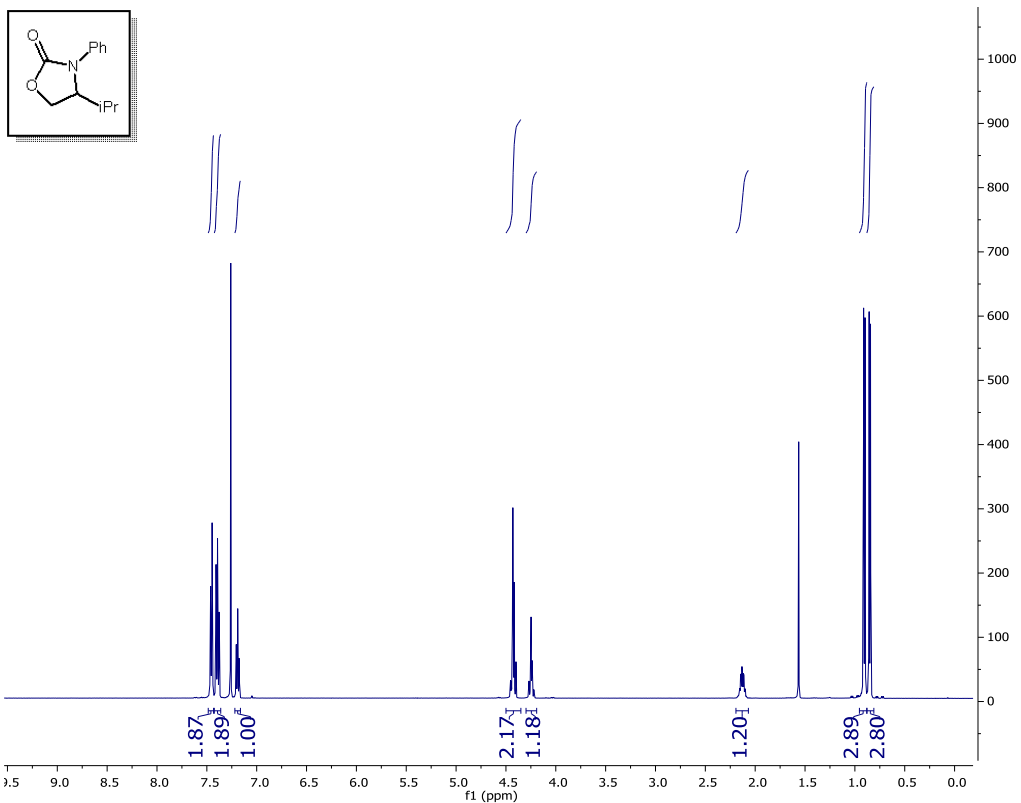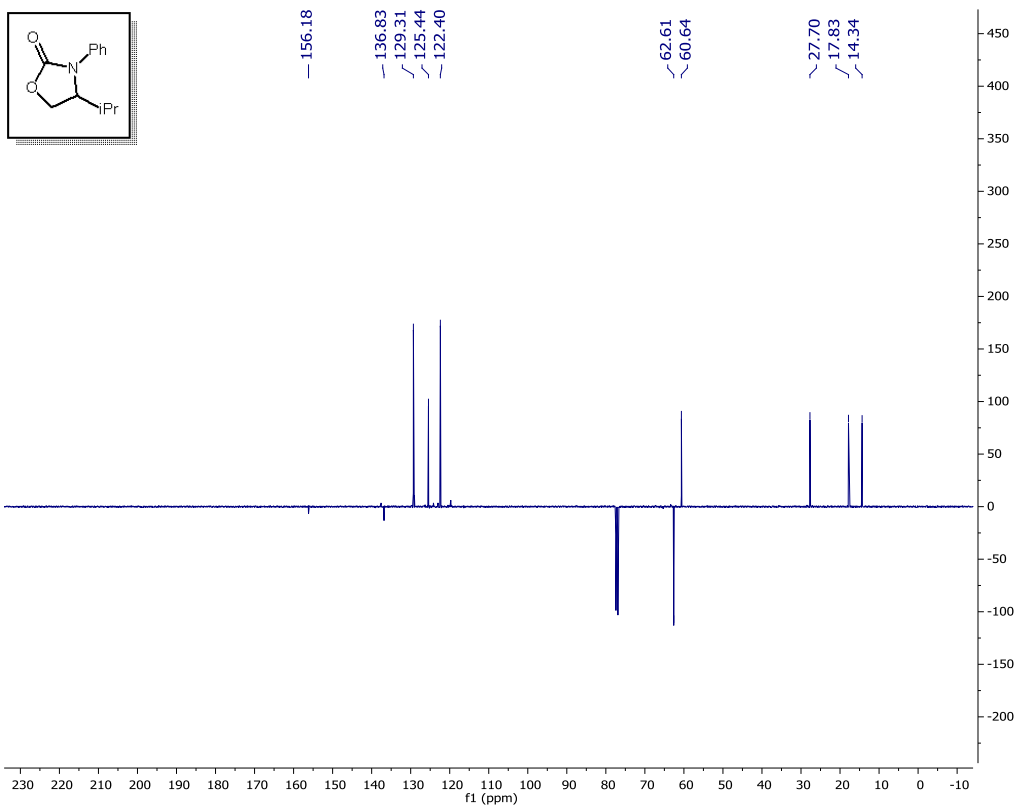

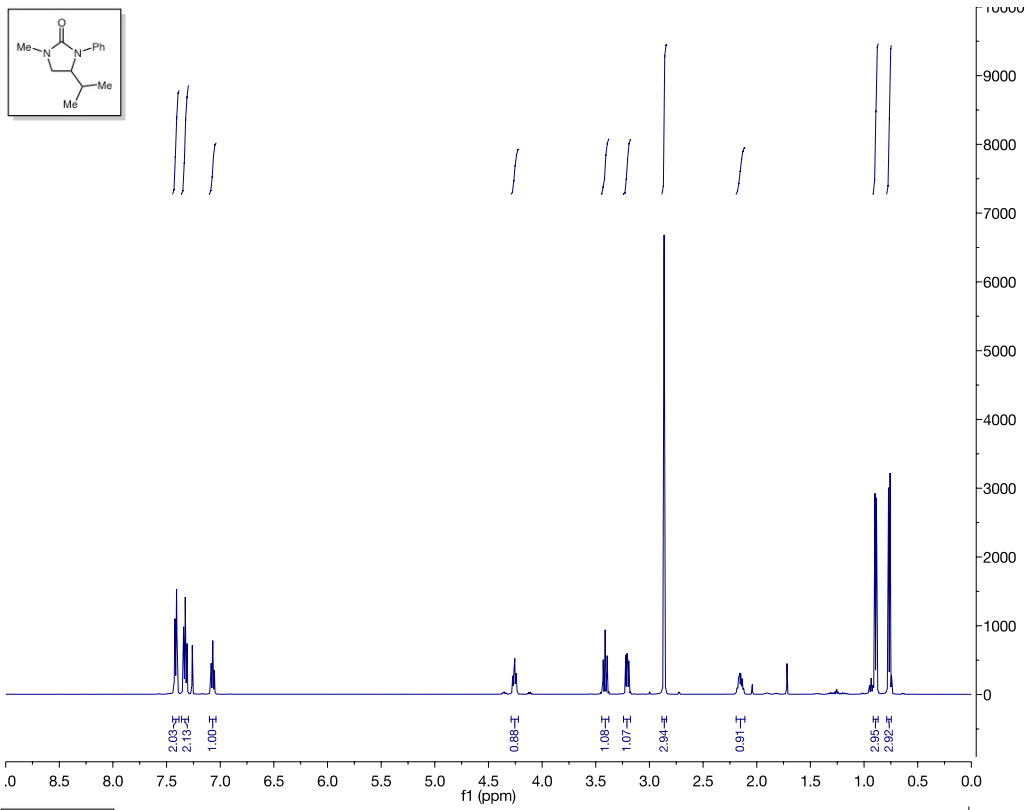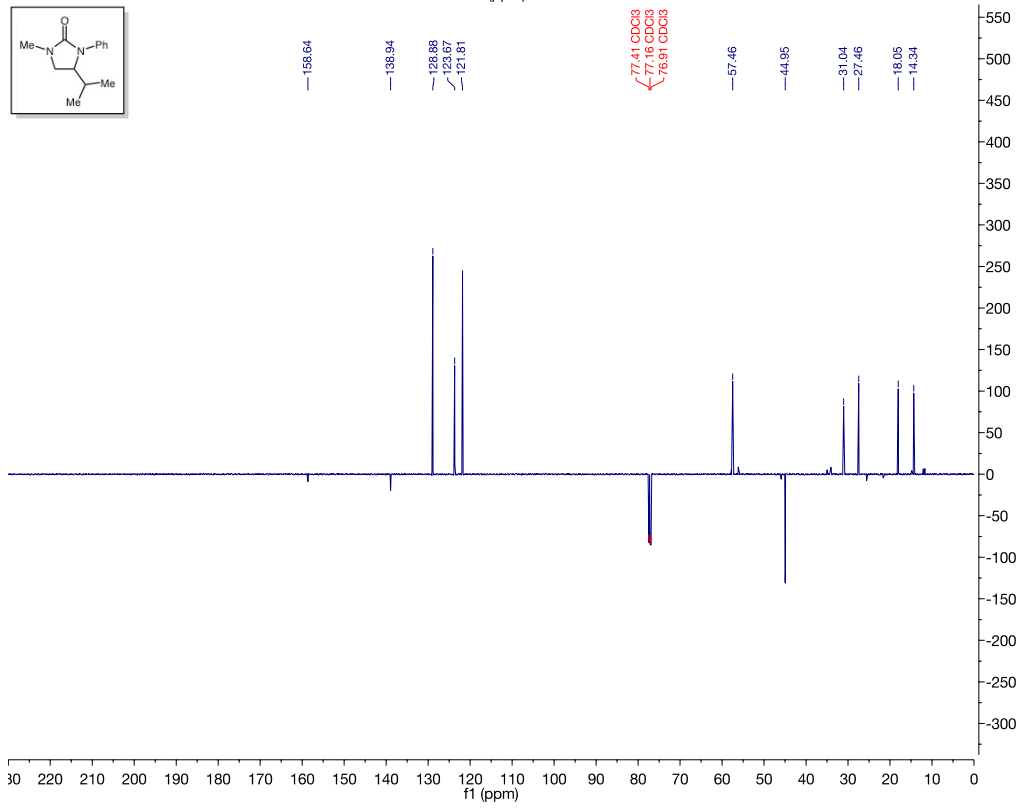

p

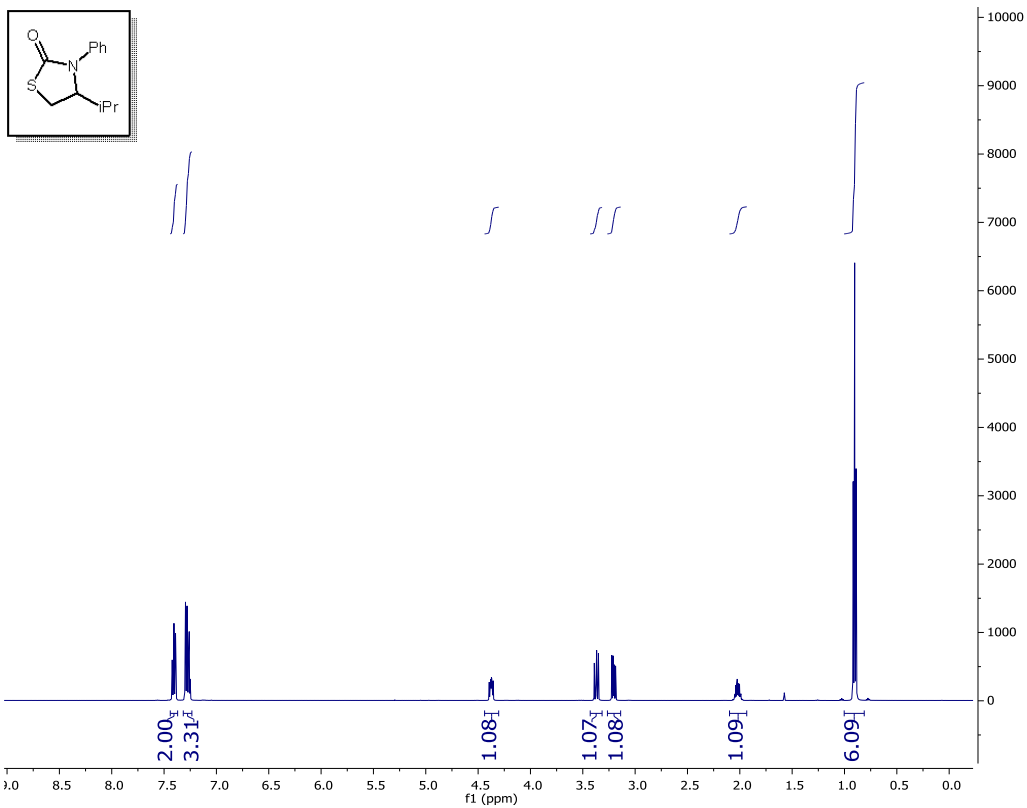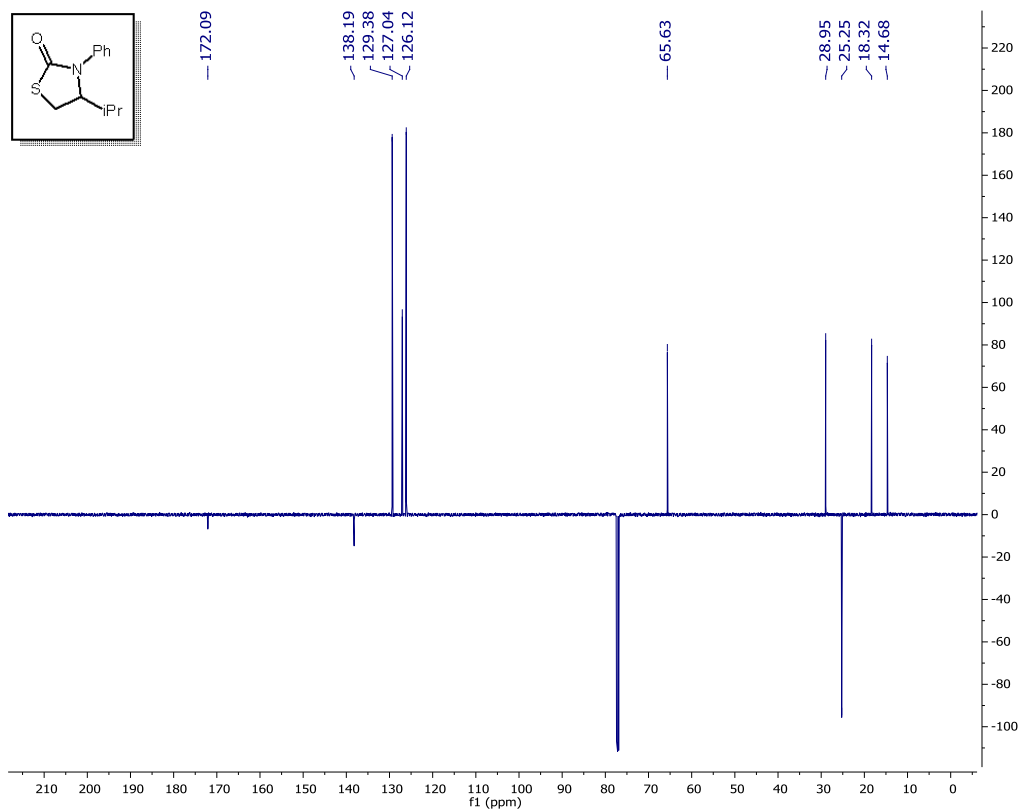

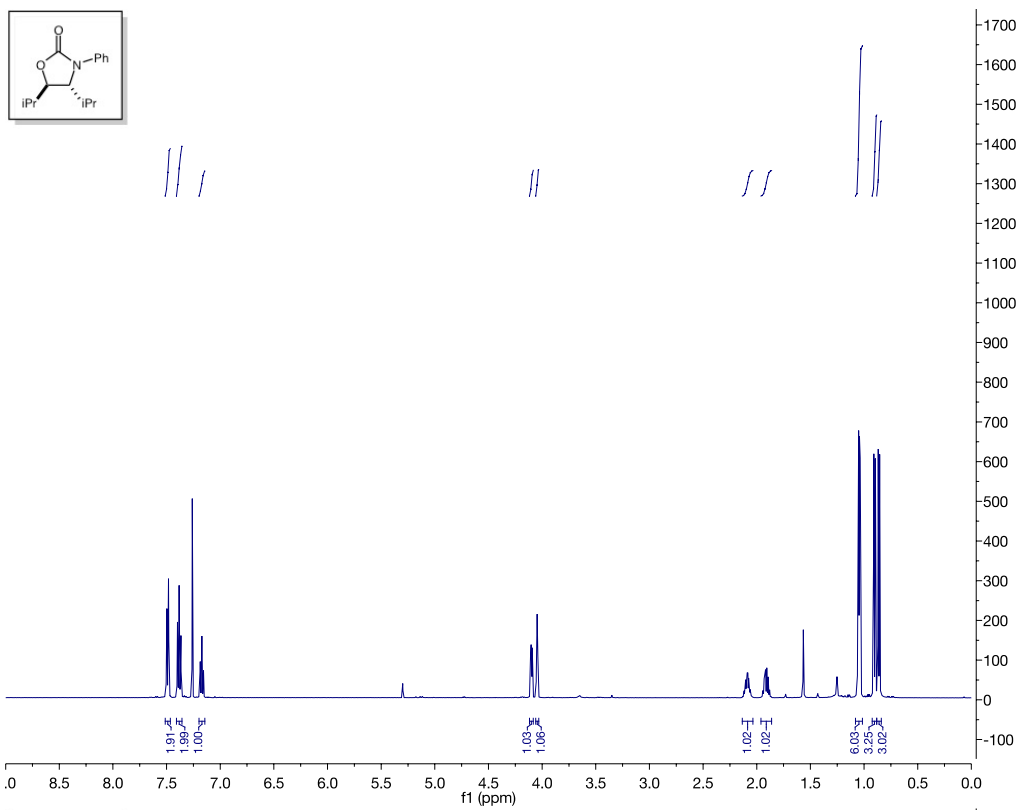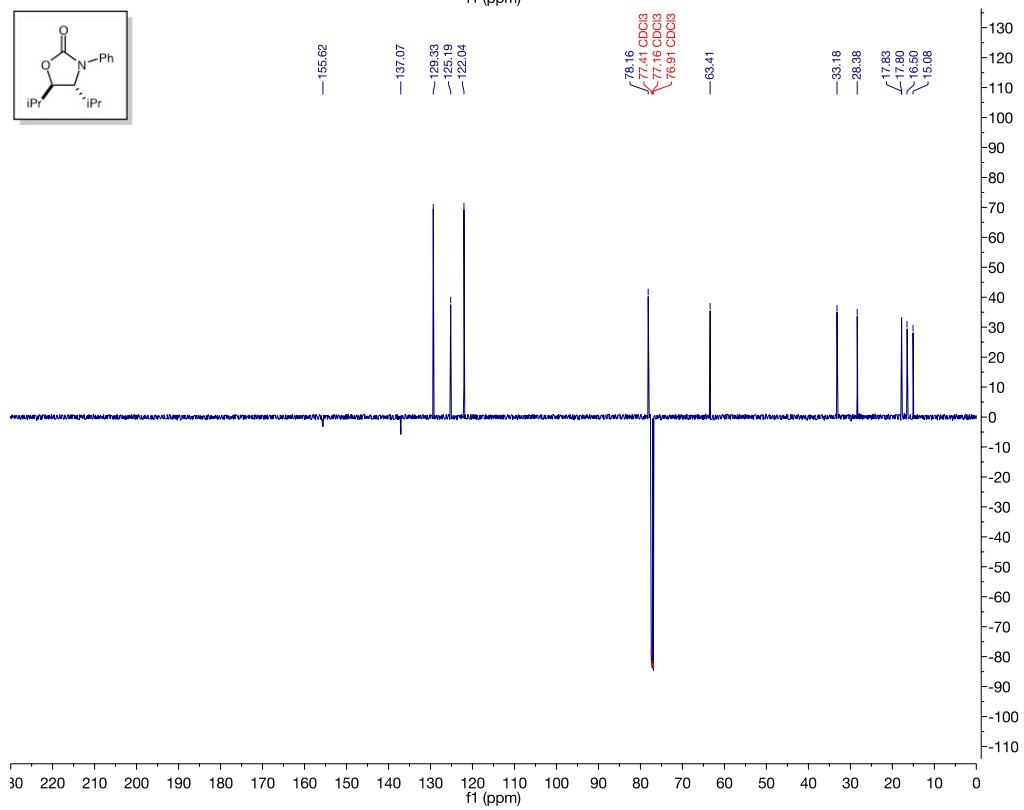

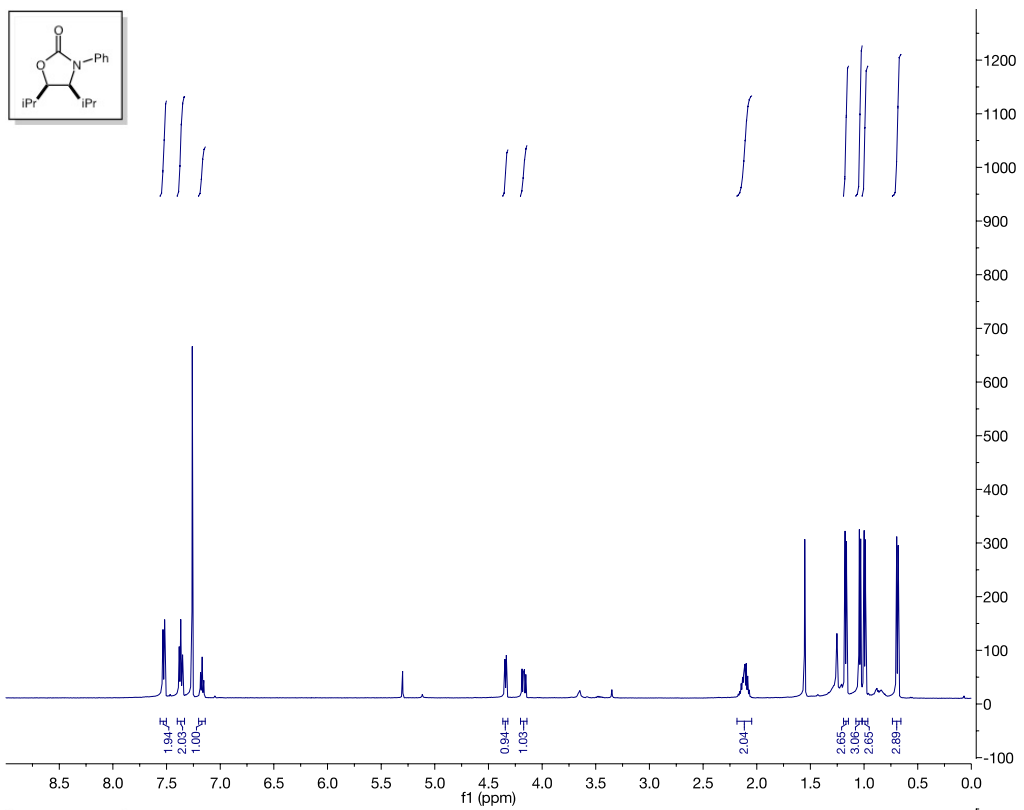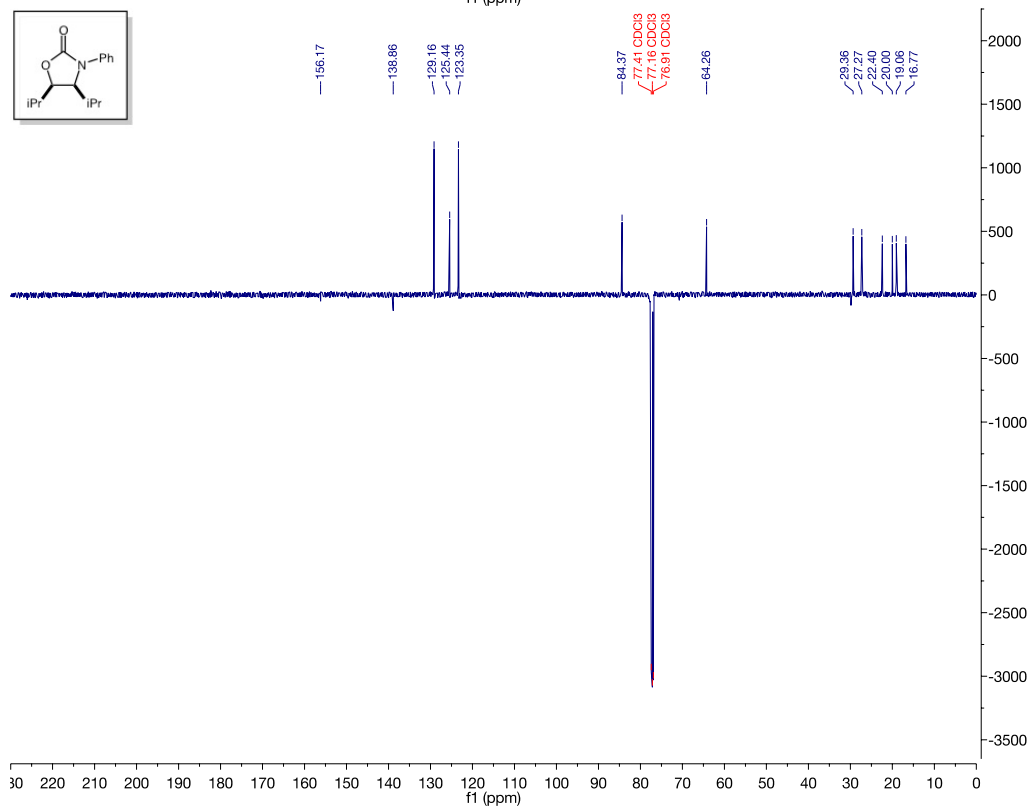



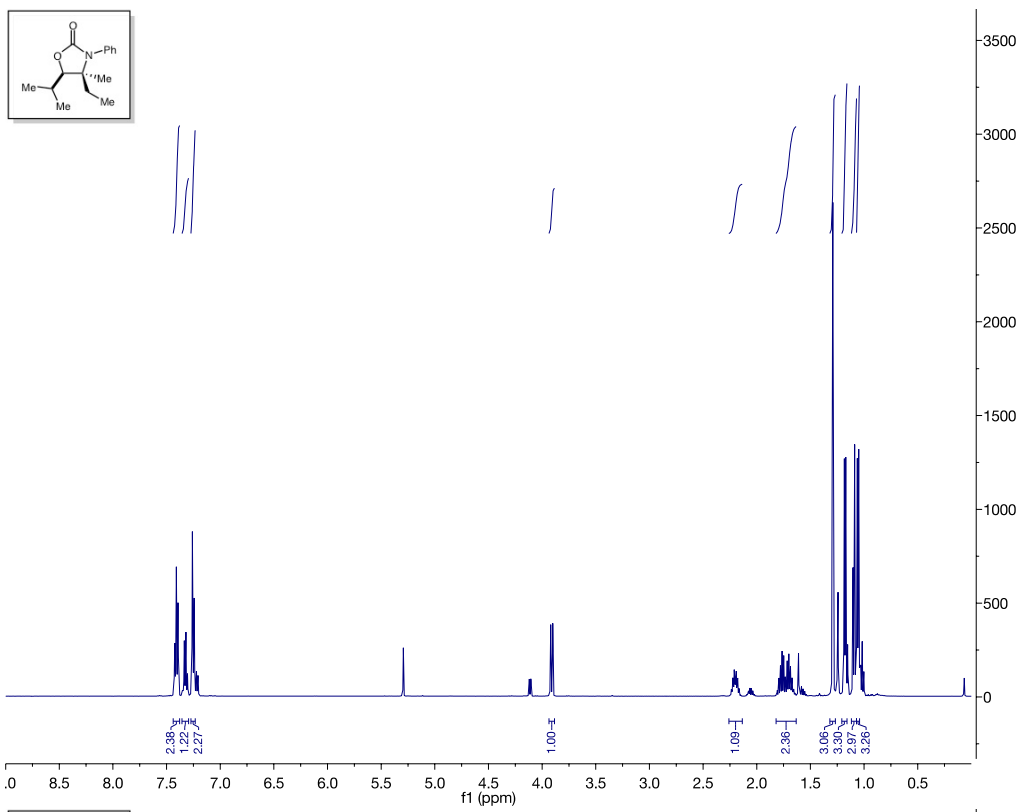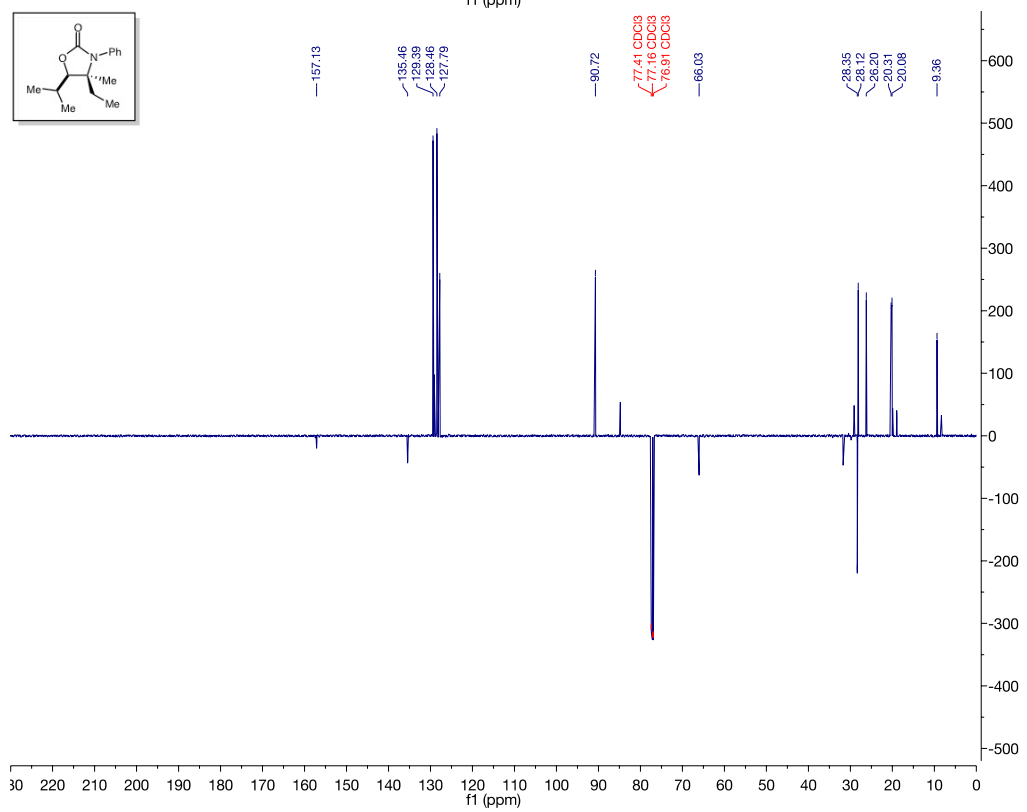

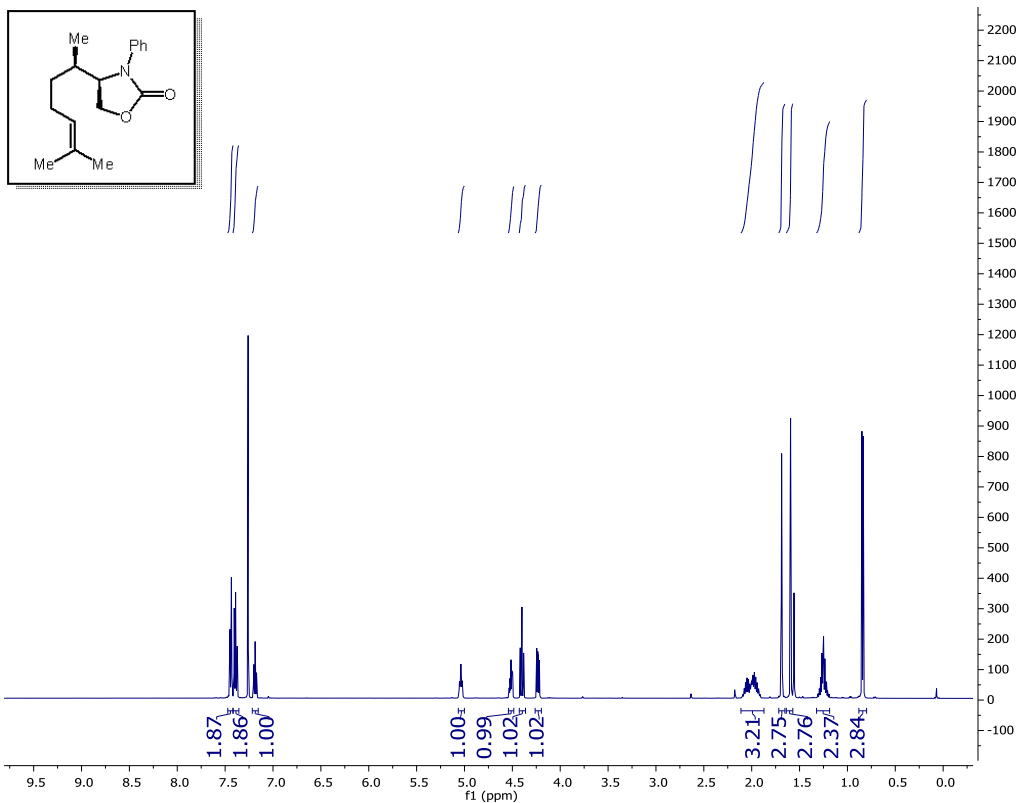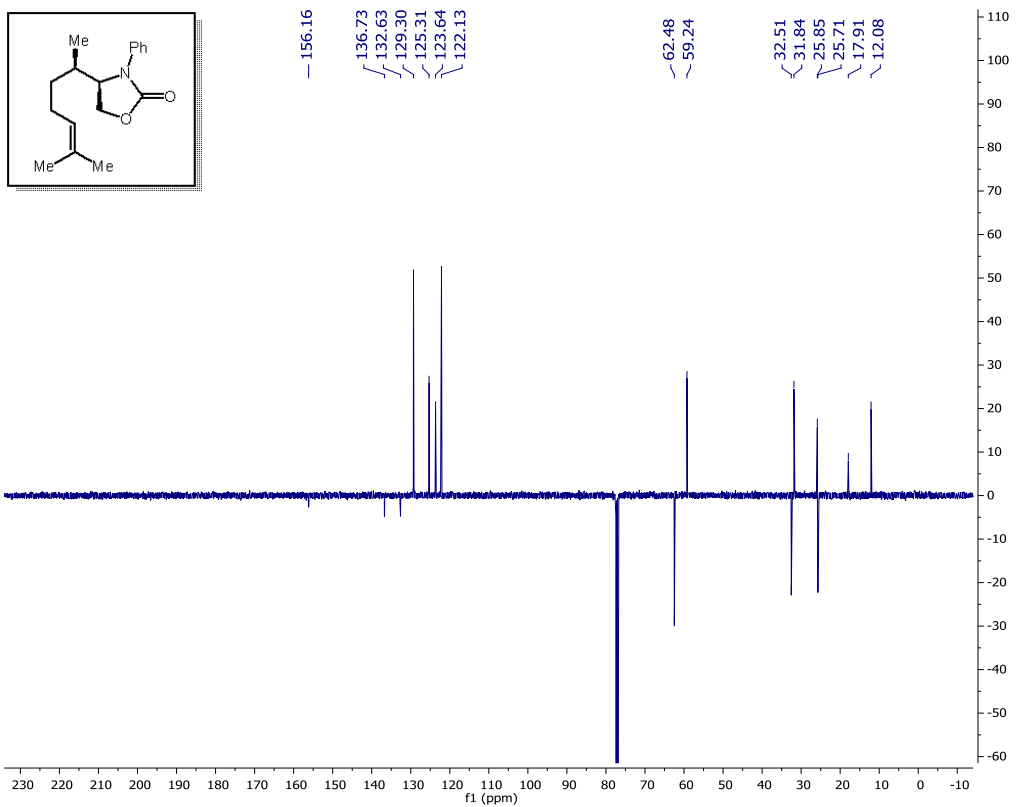

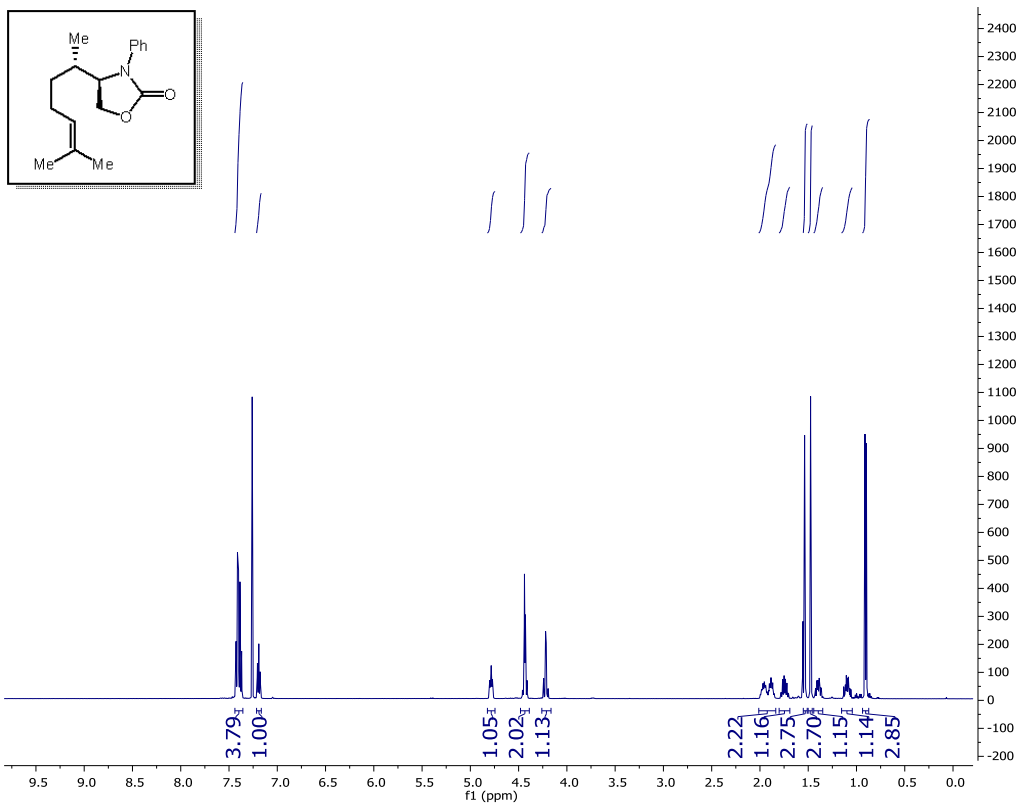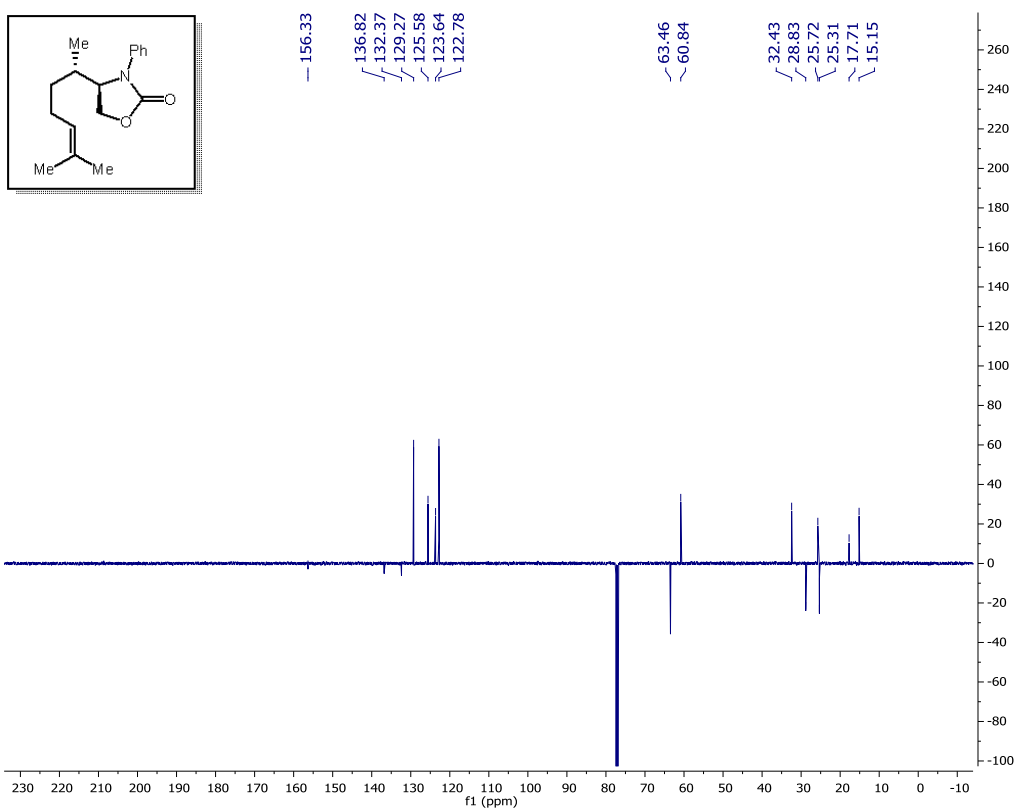

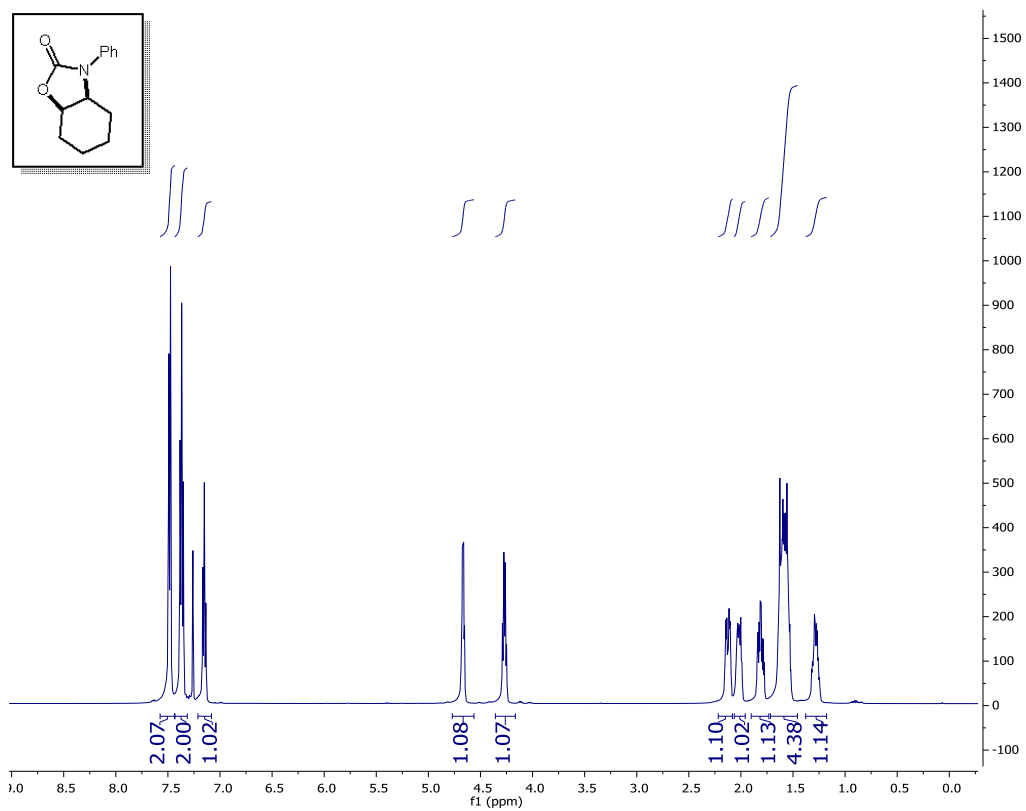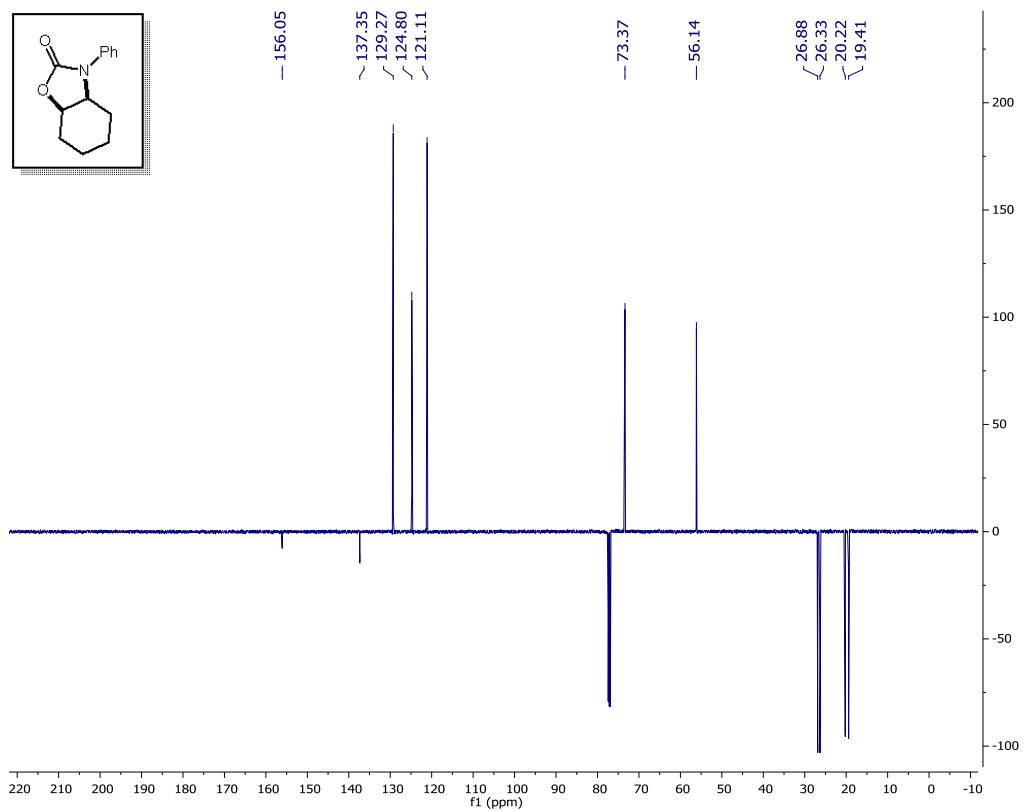

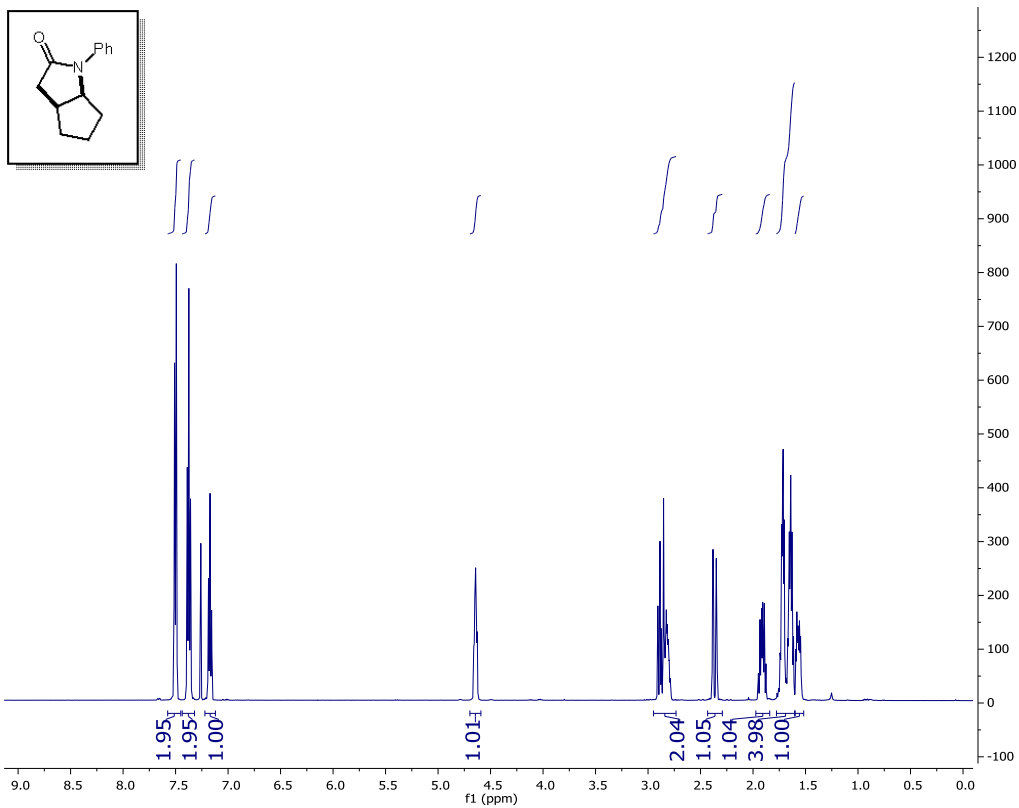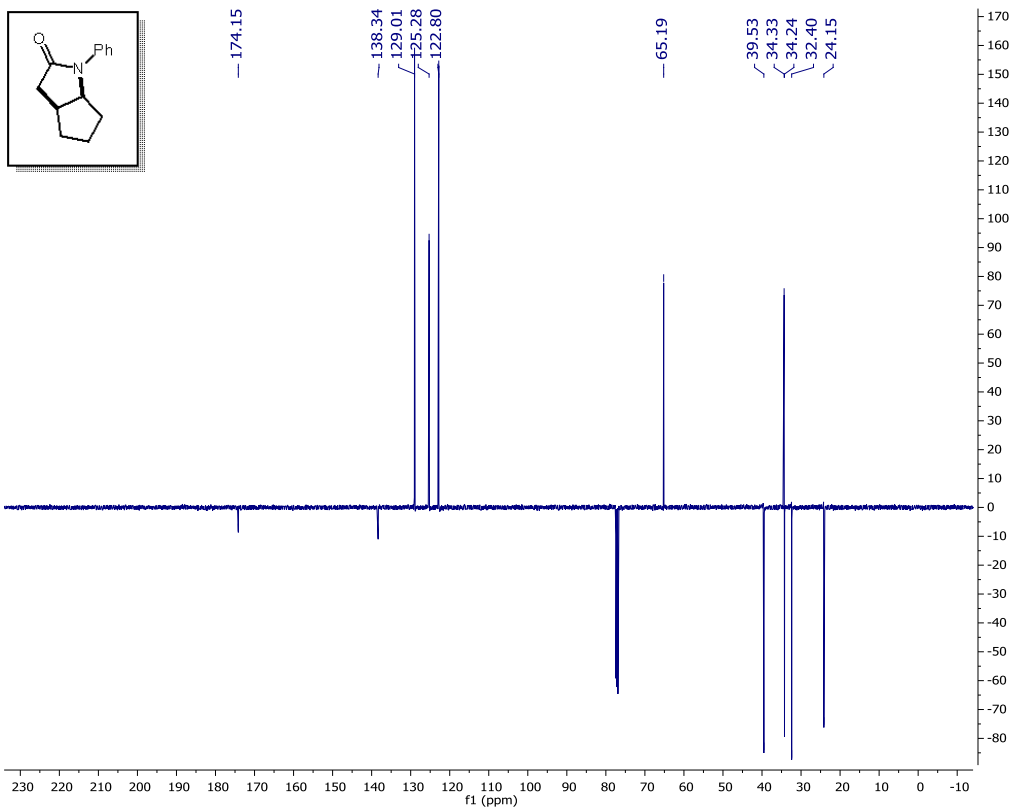

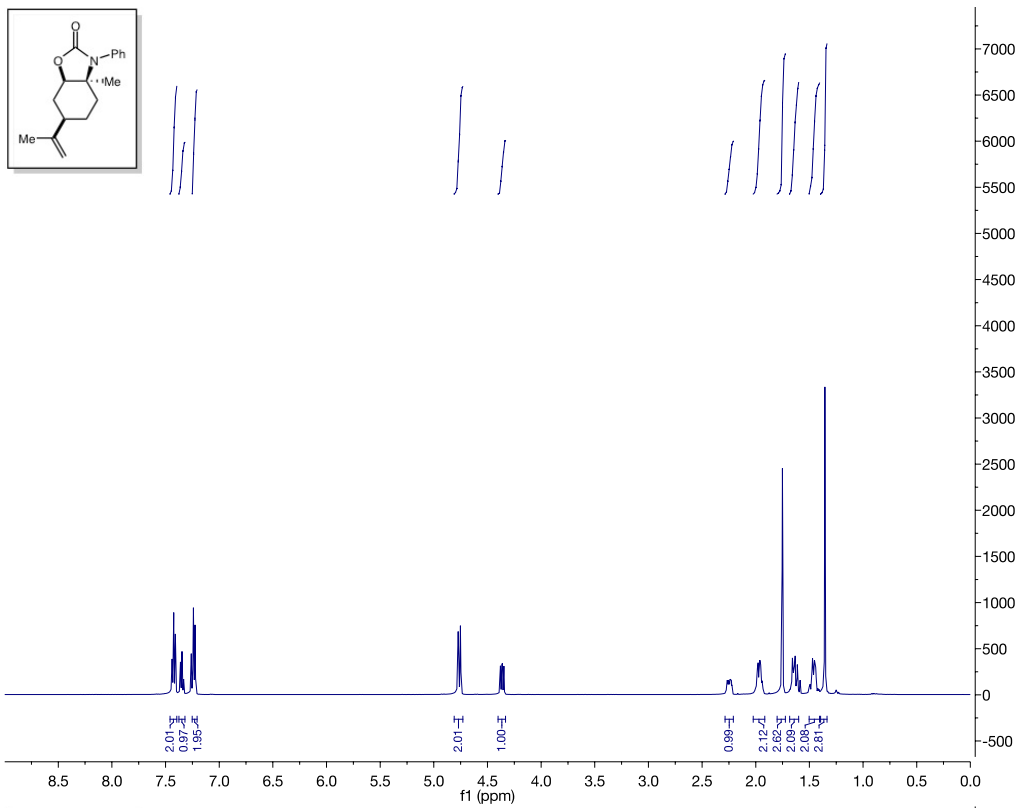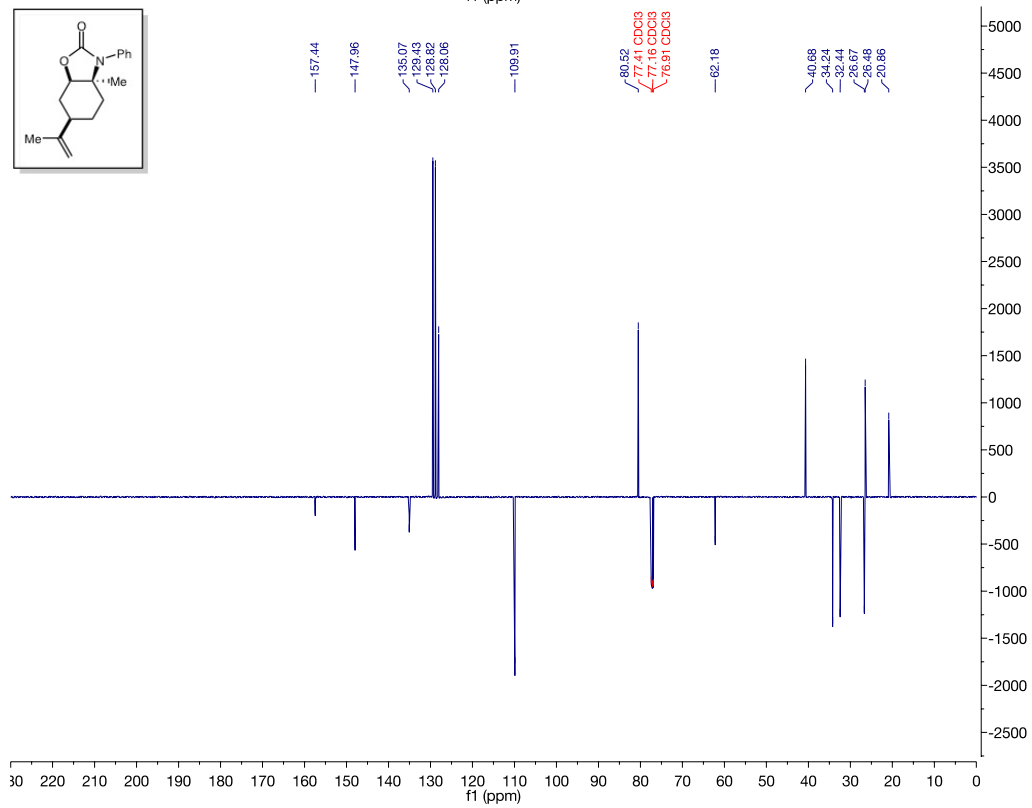

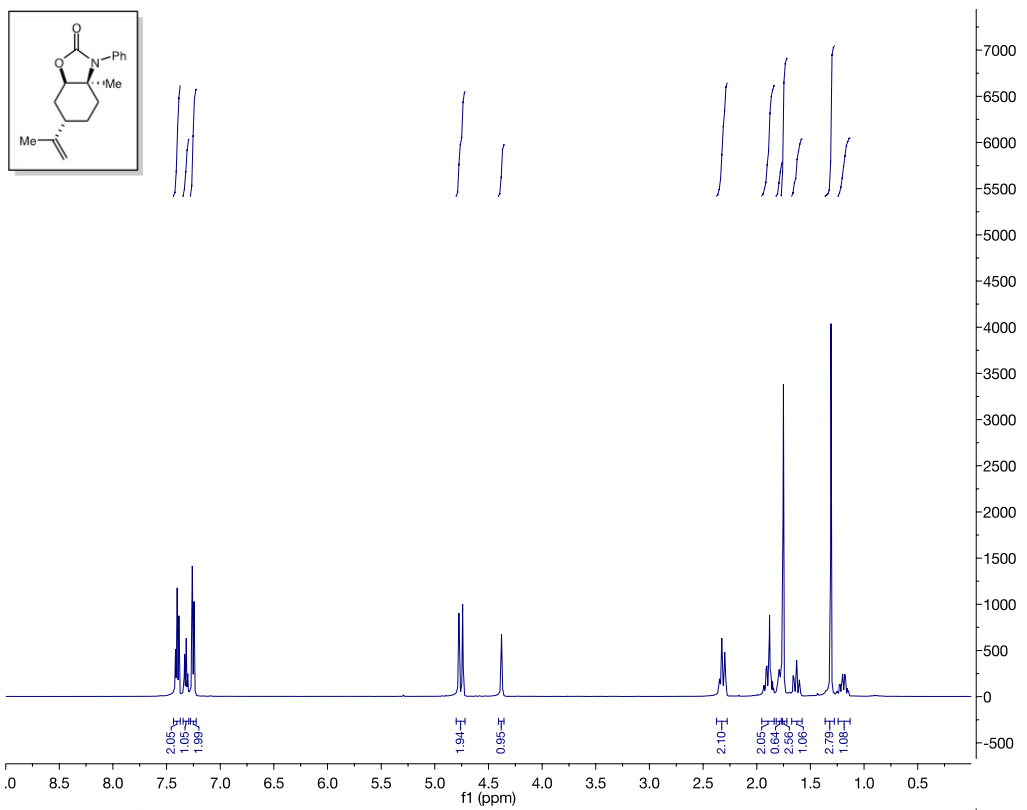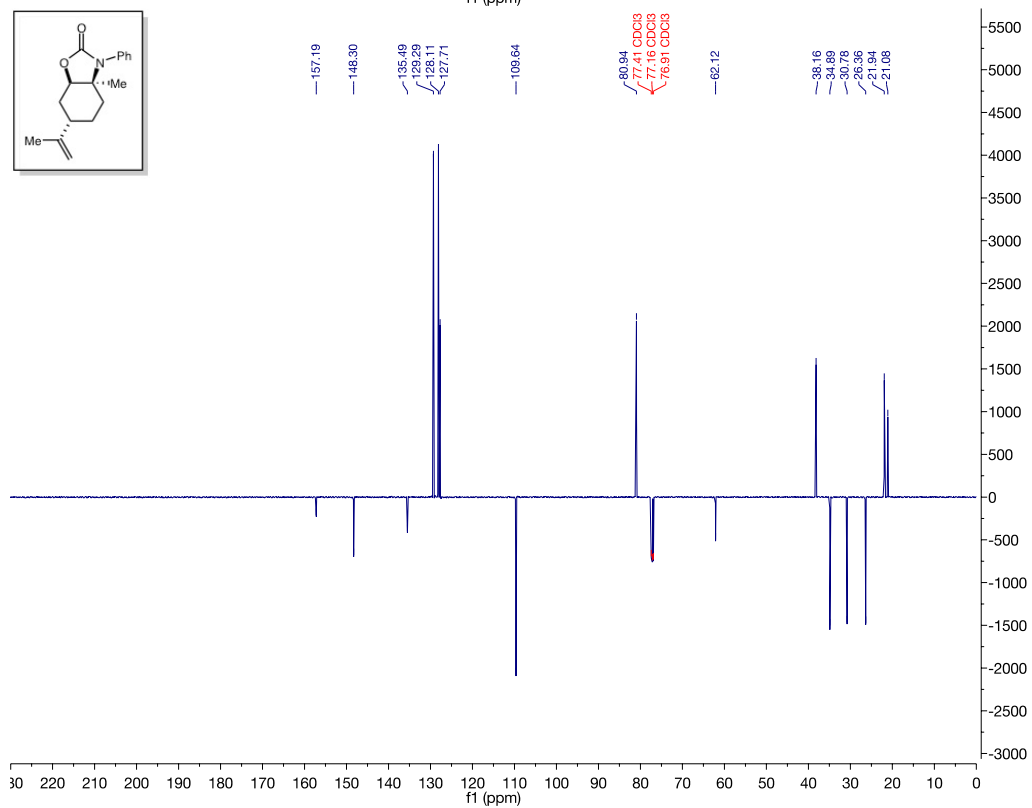

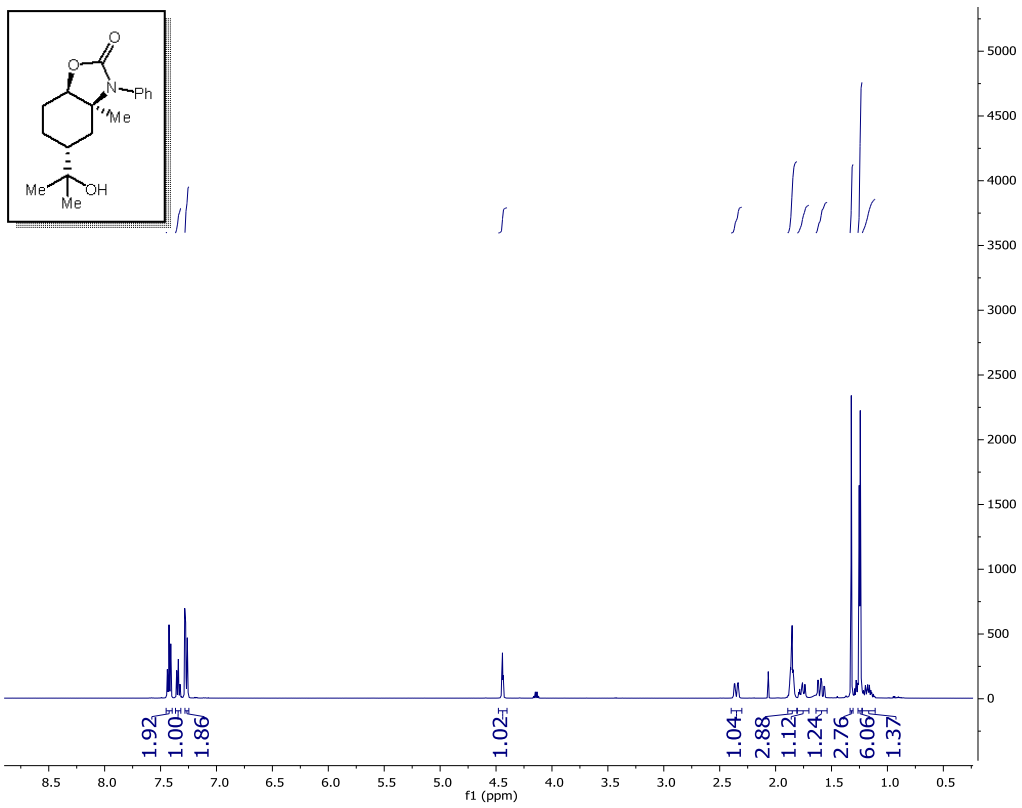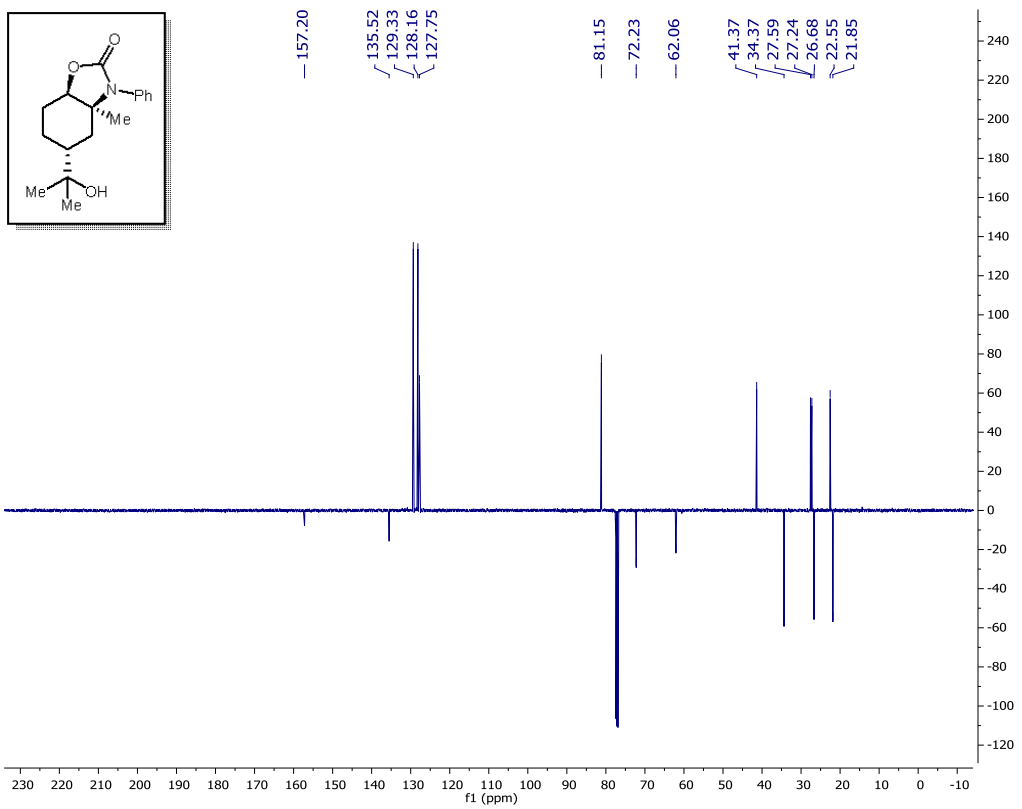



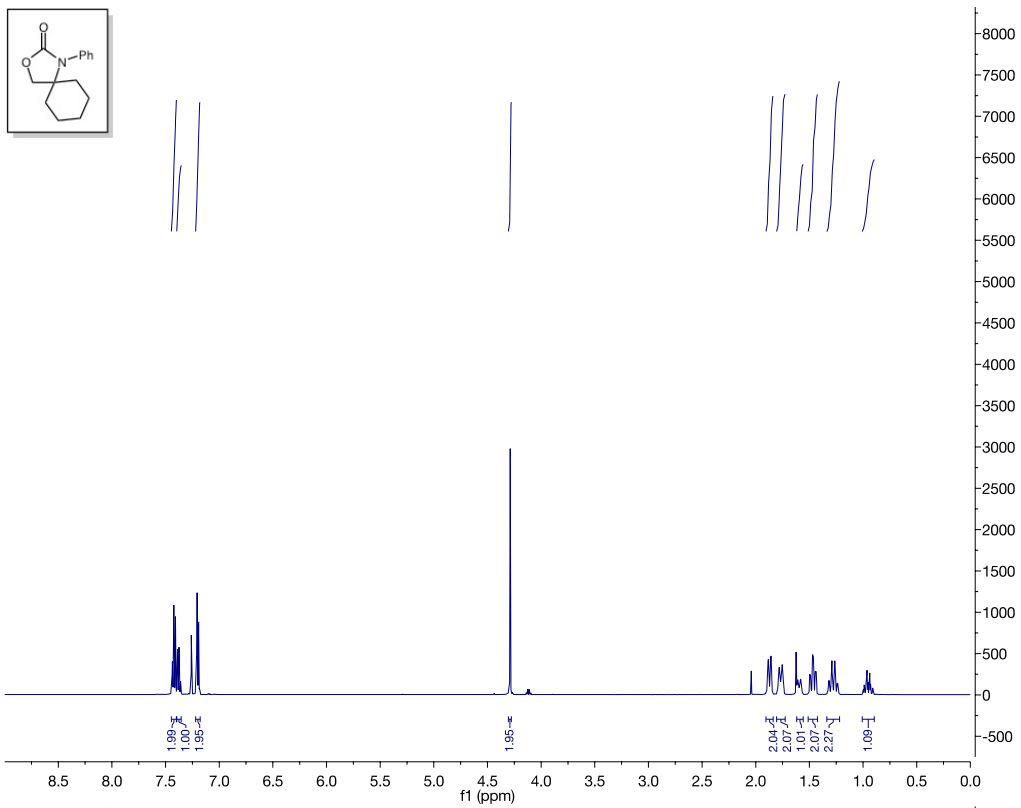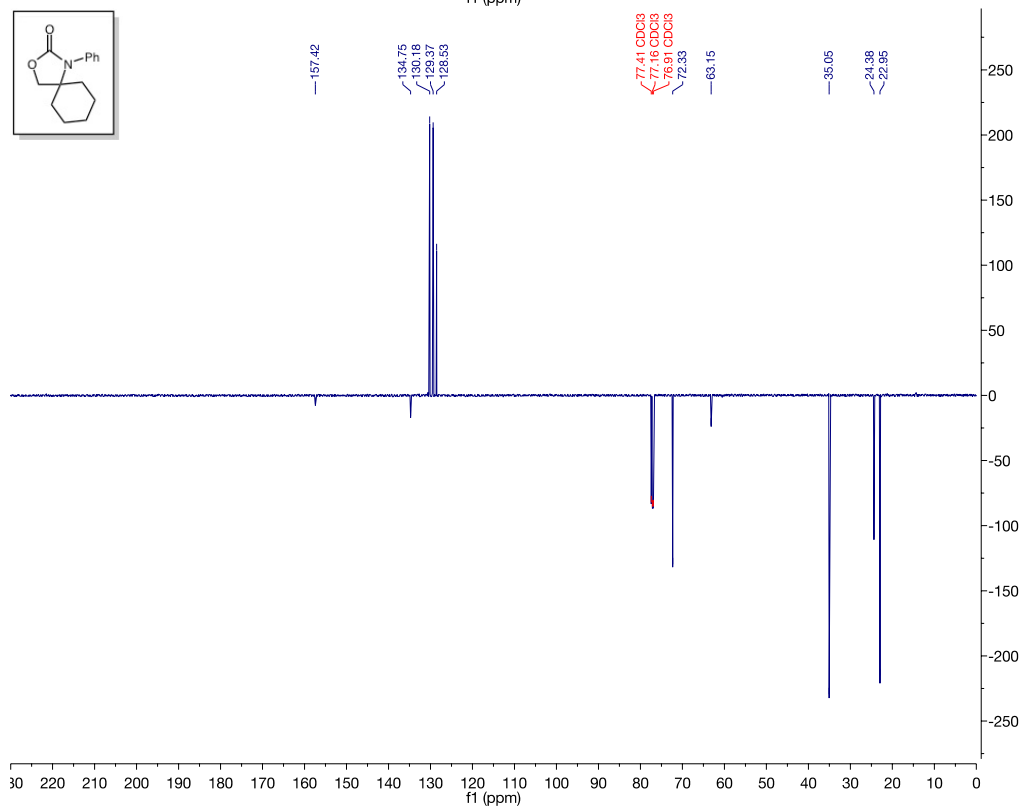

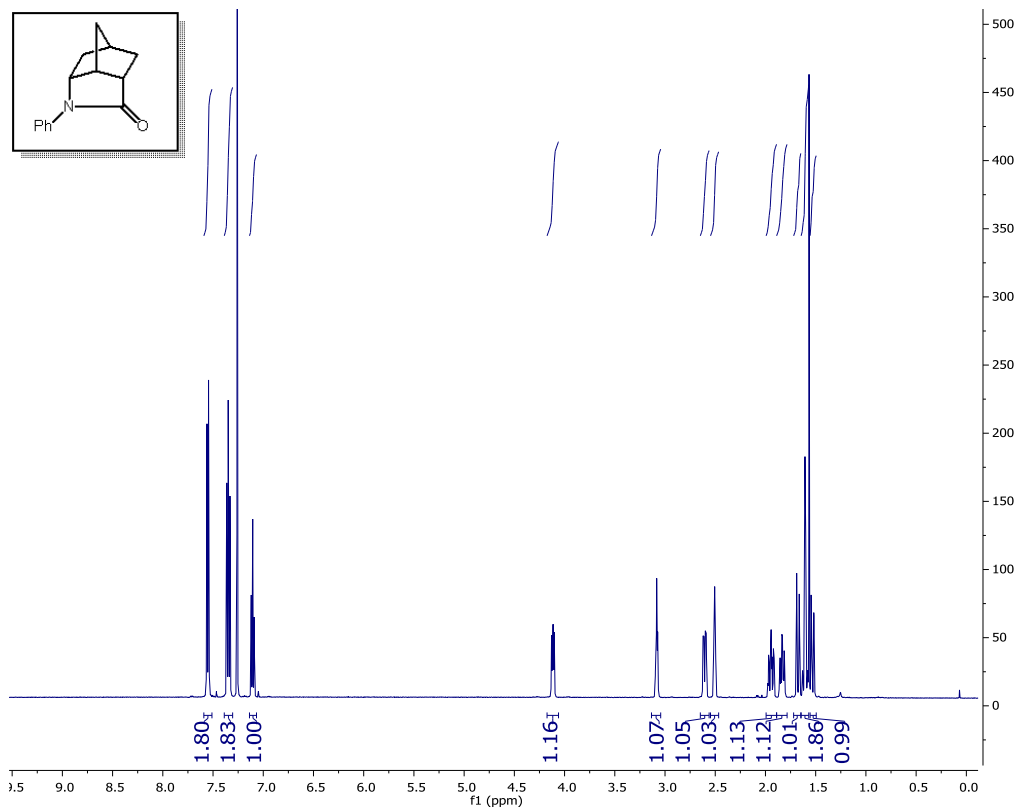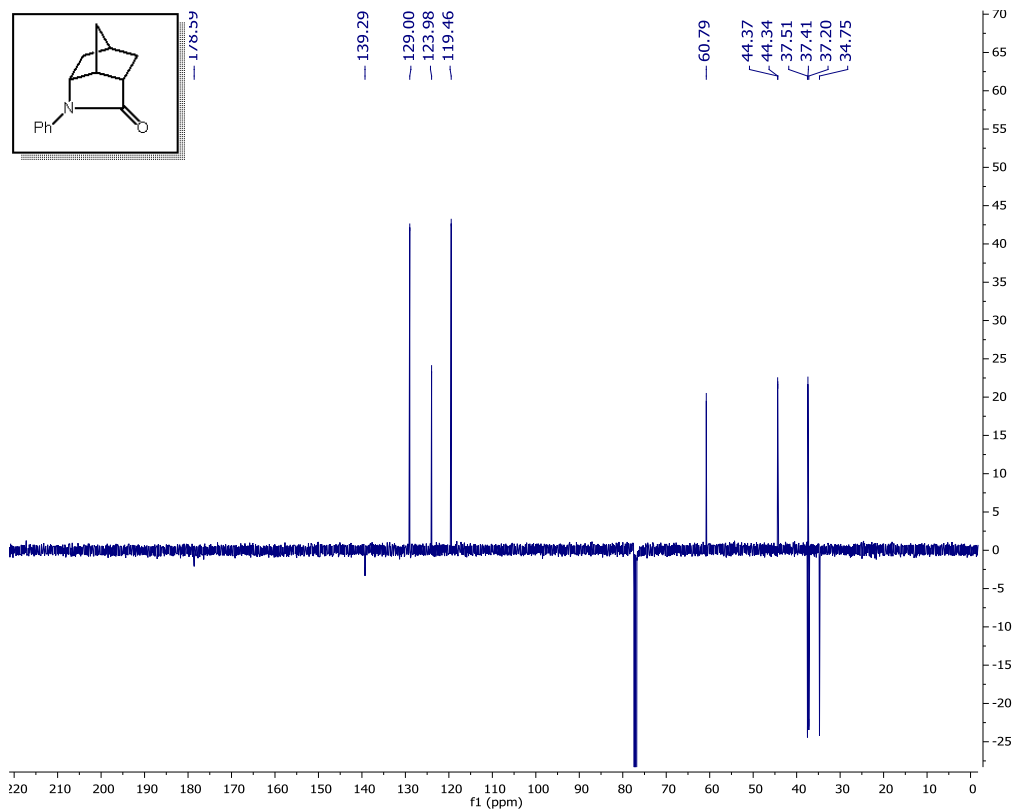

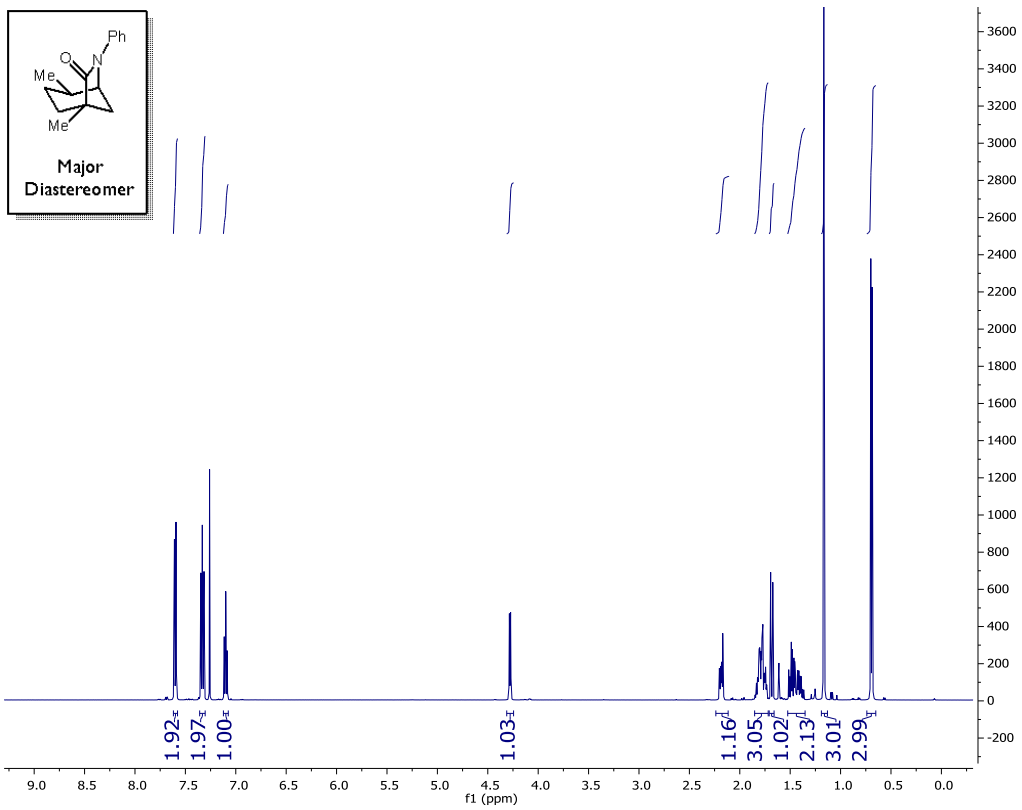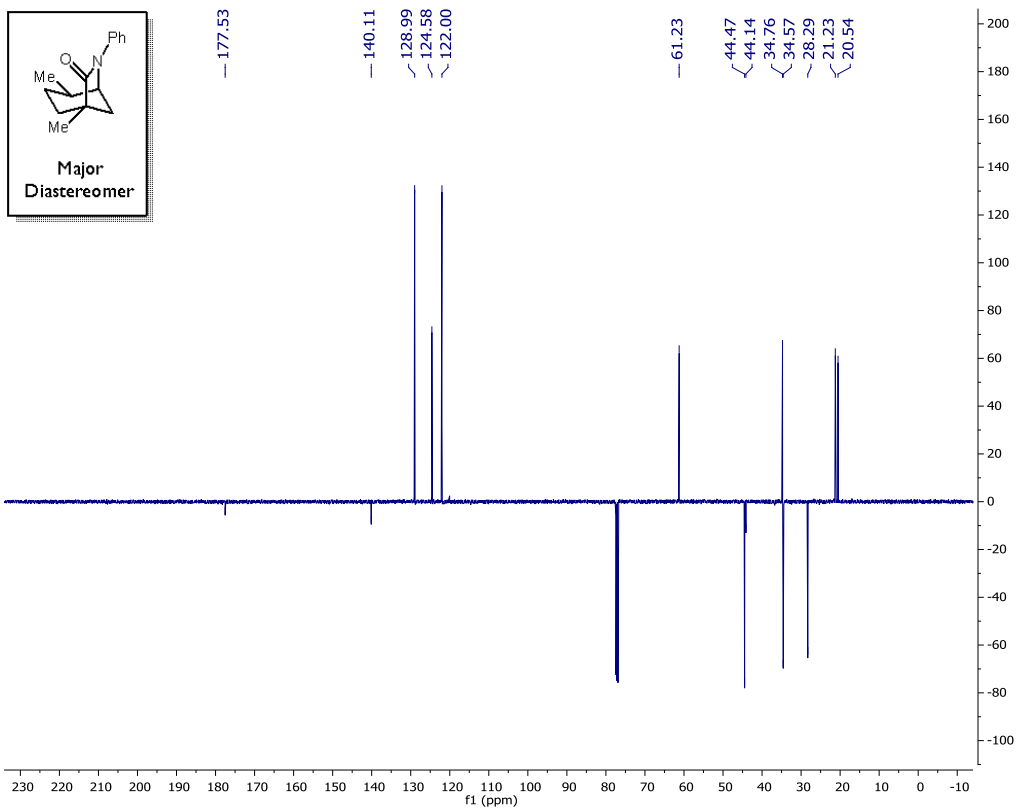

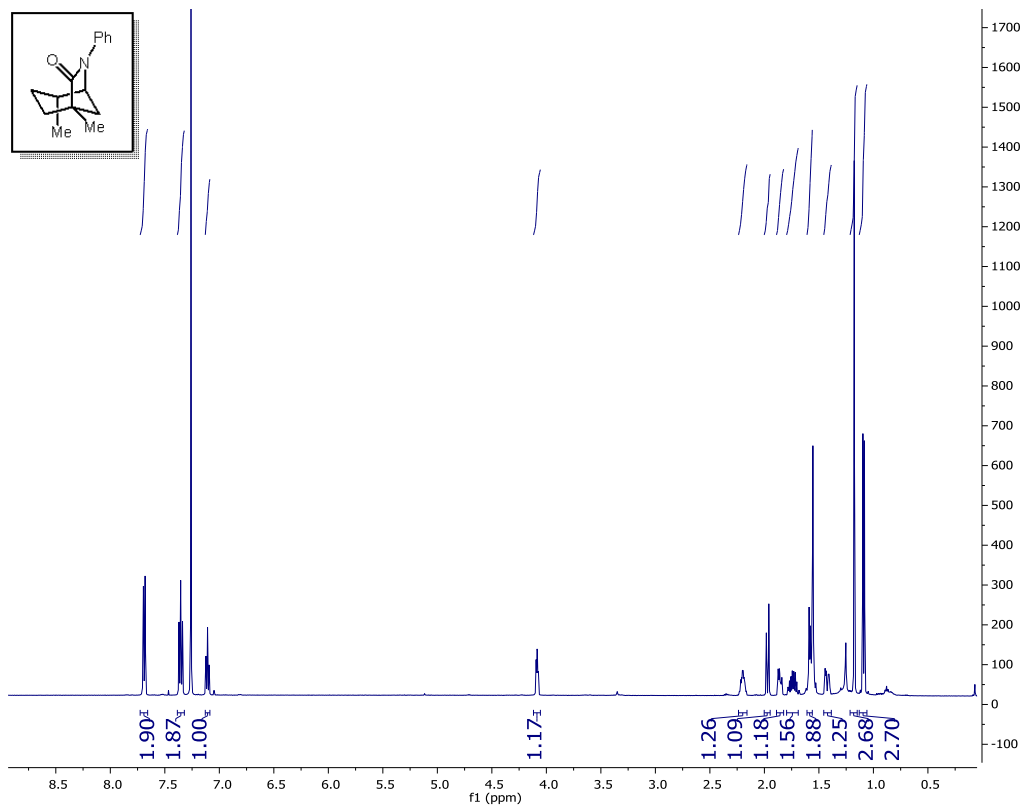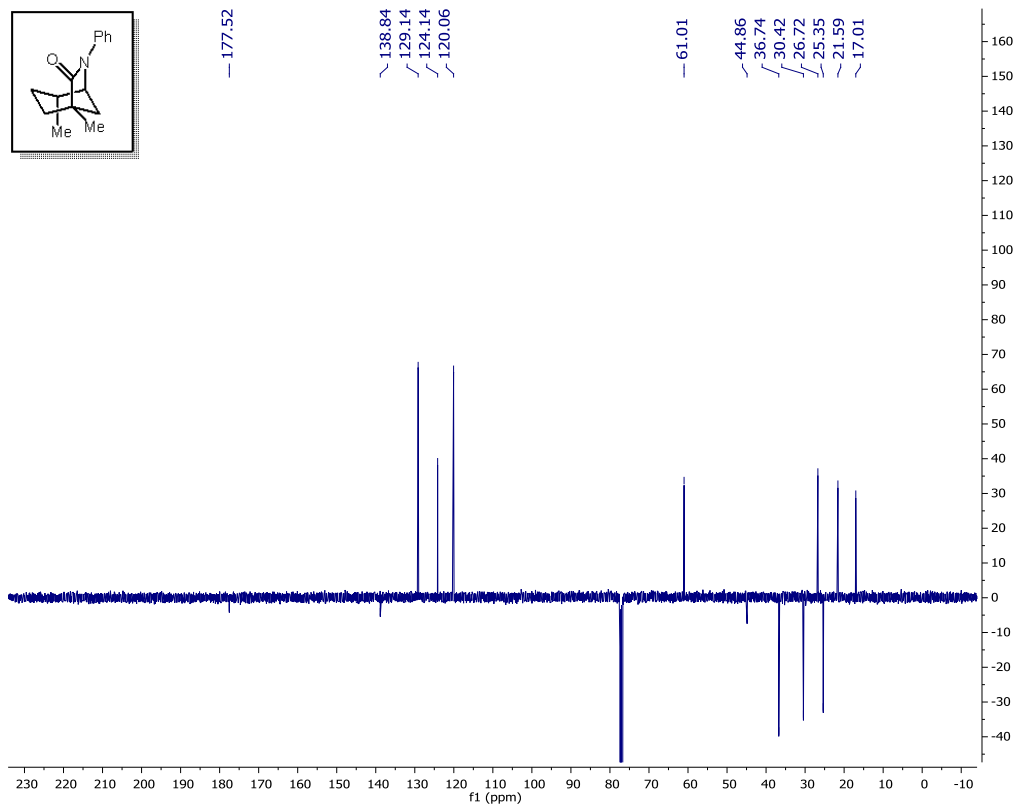

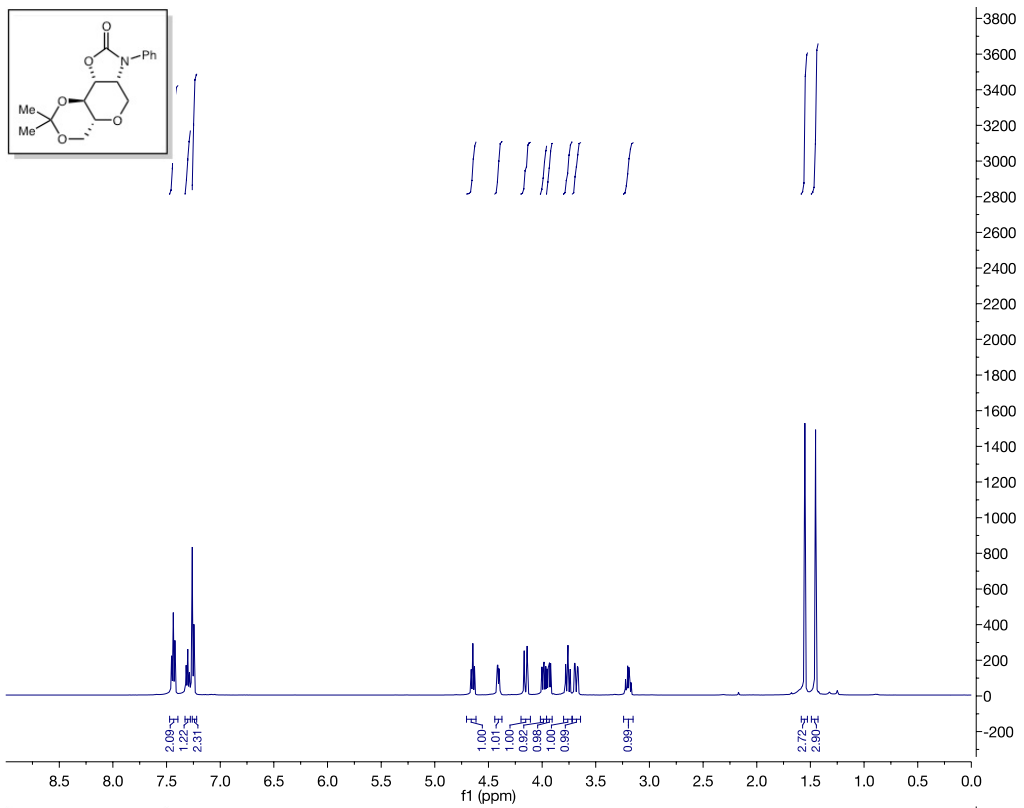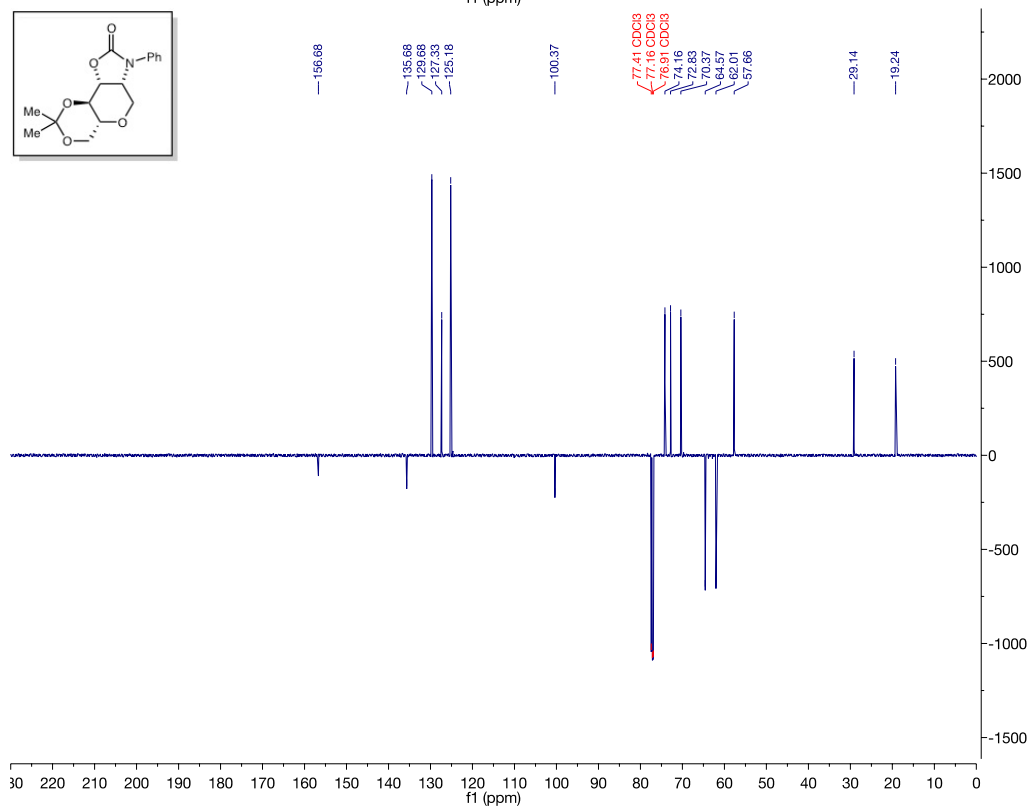

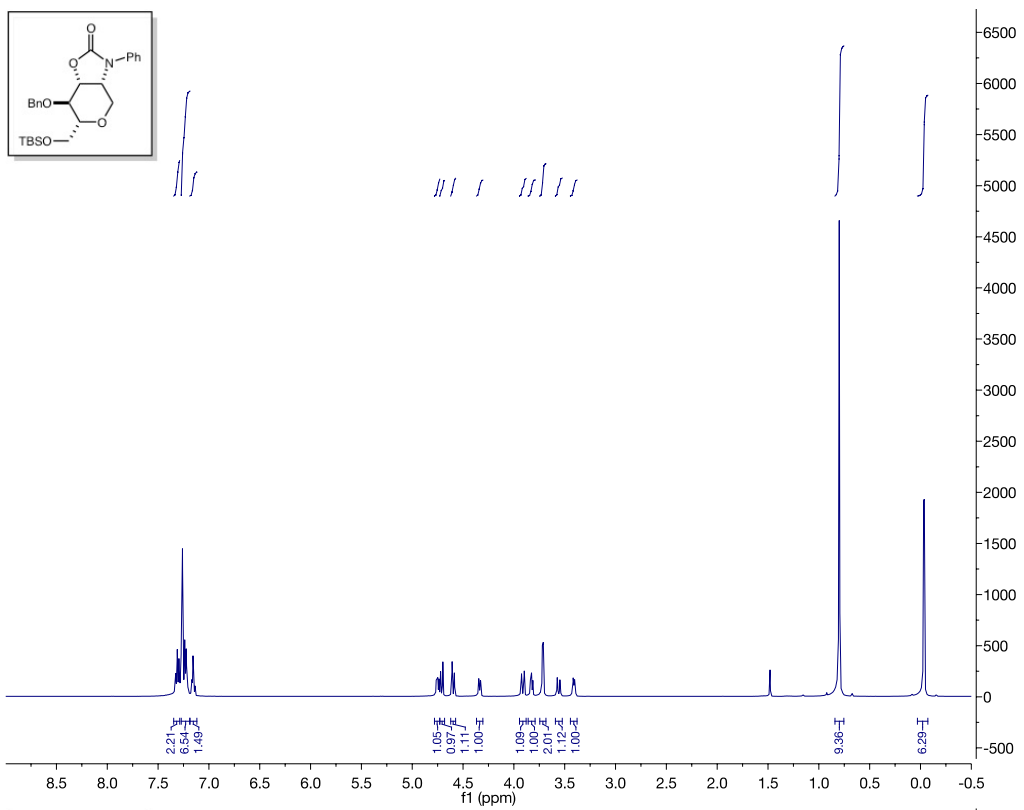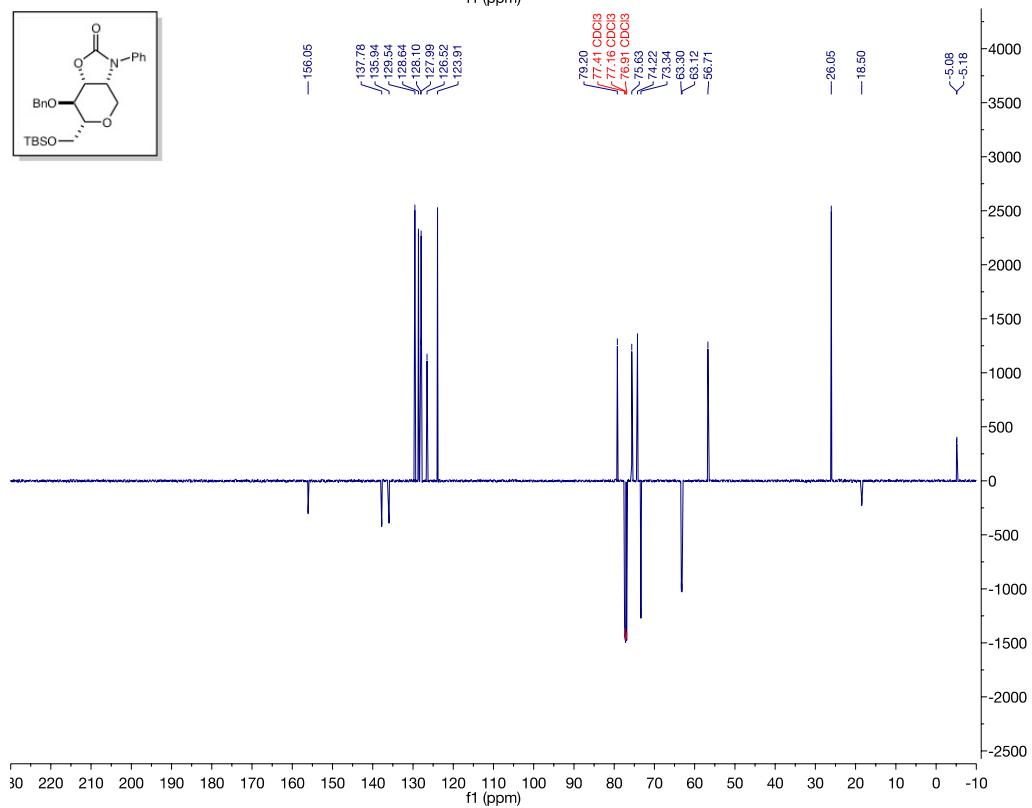

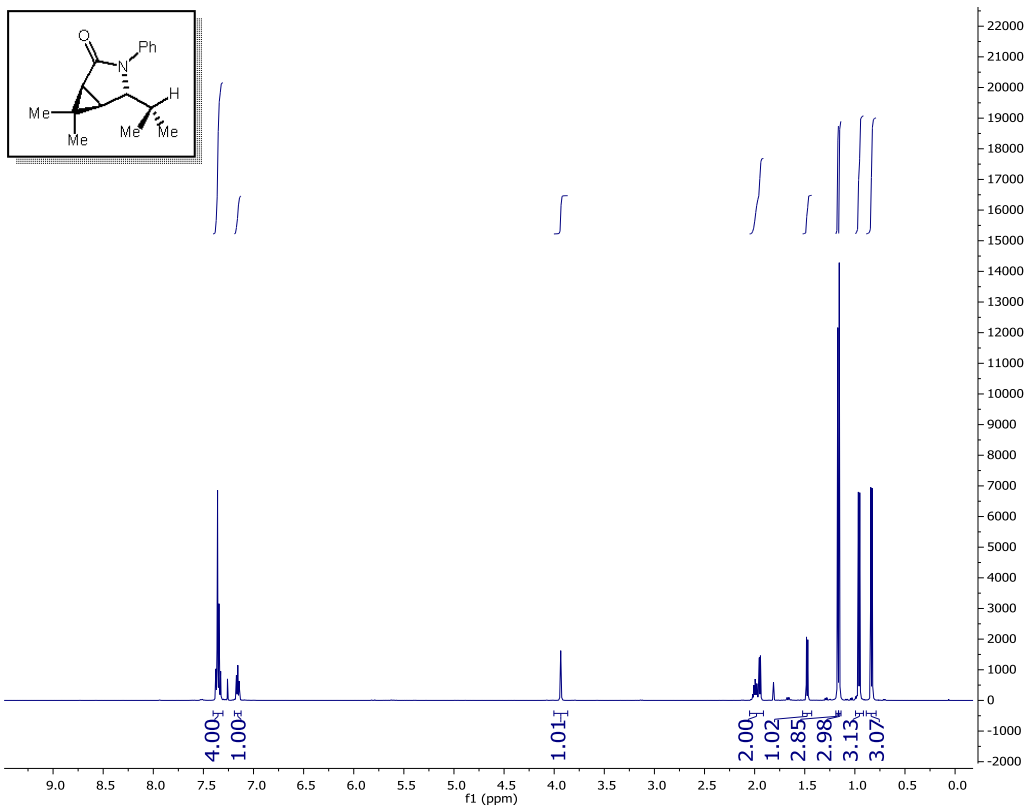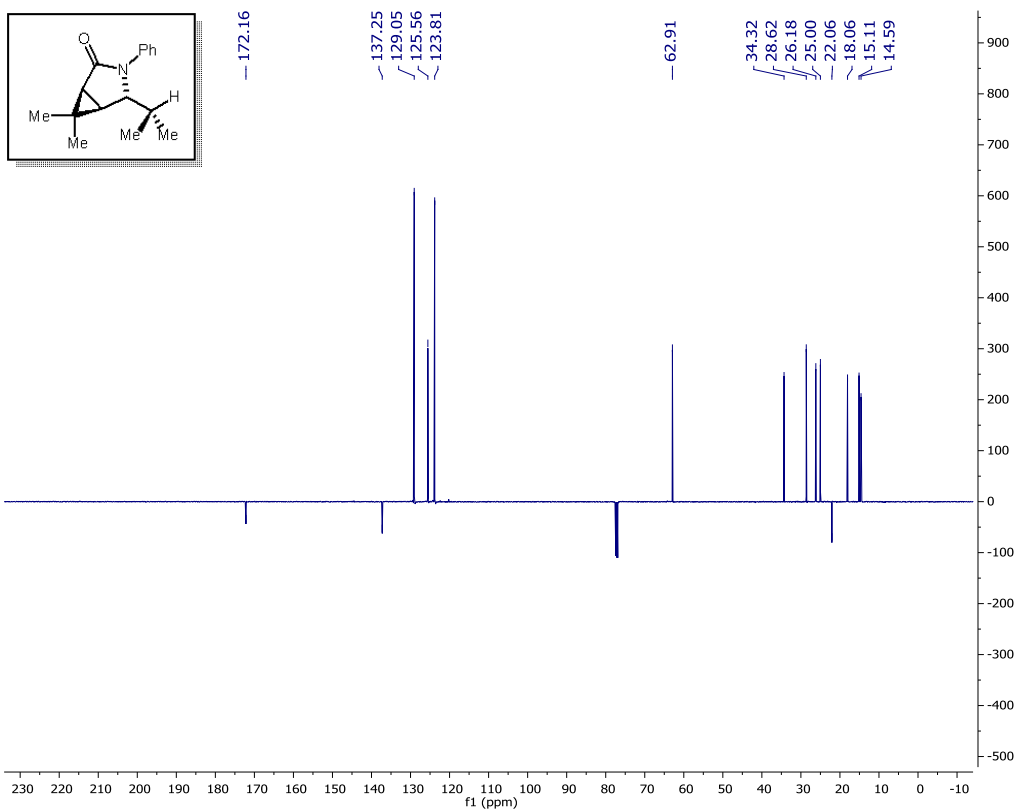

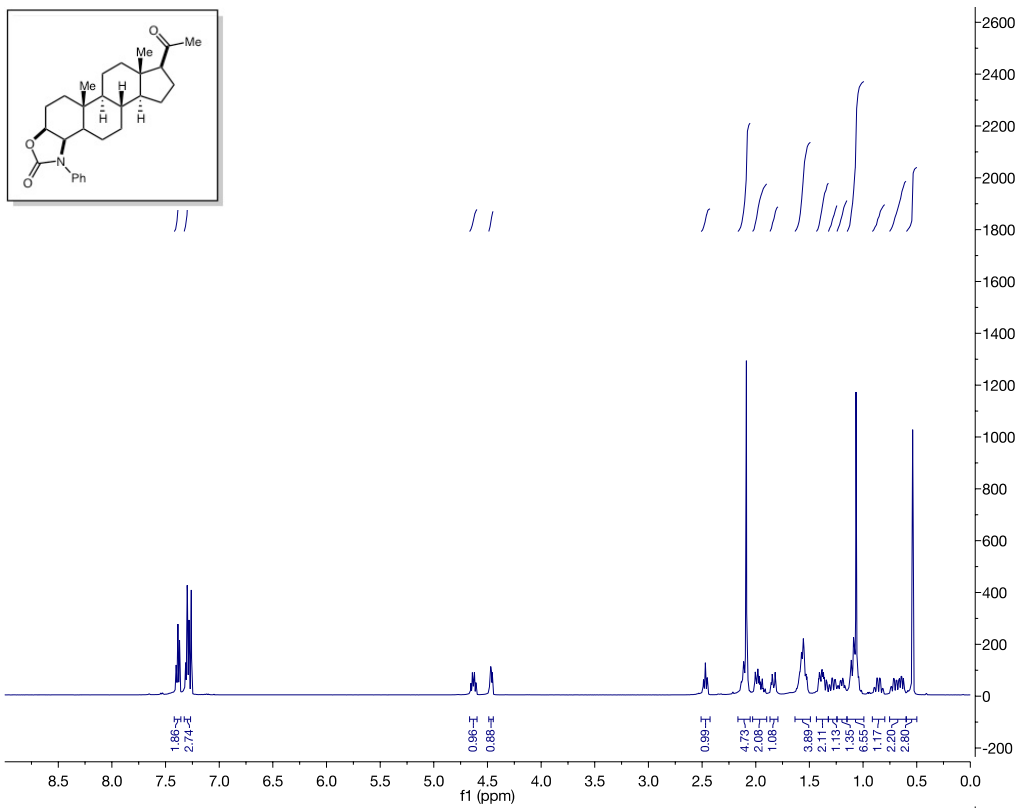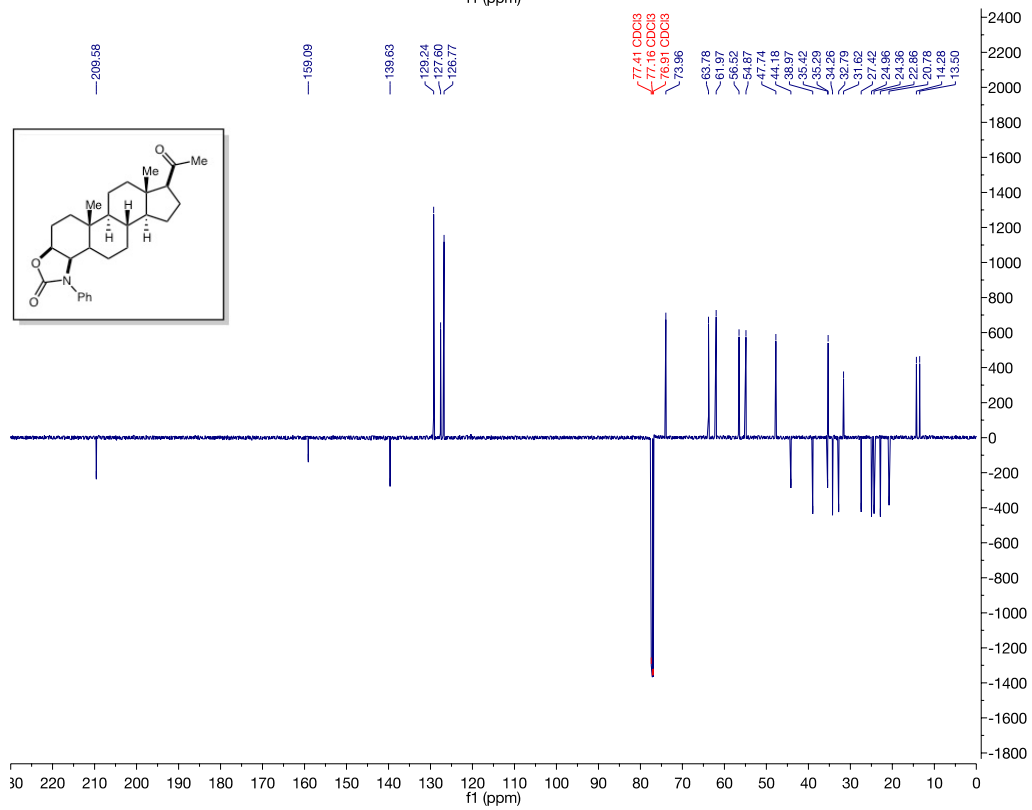



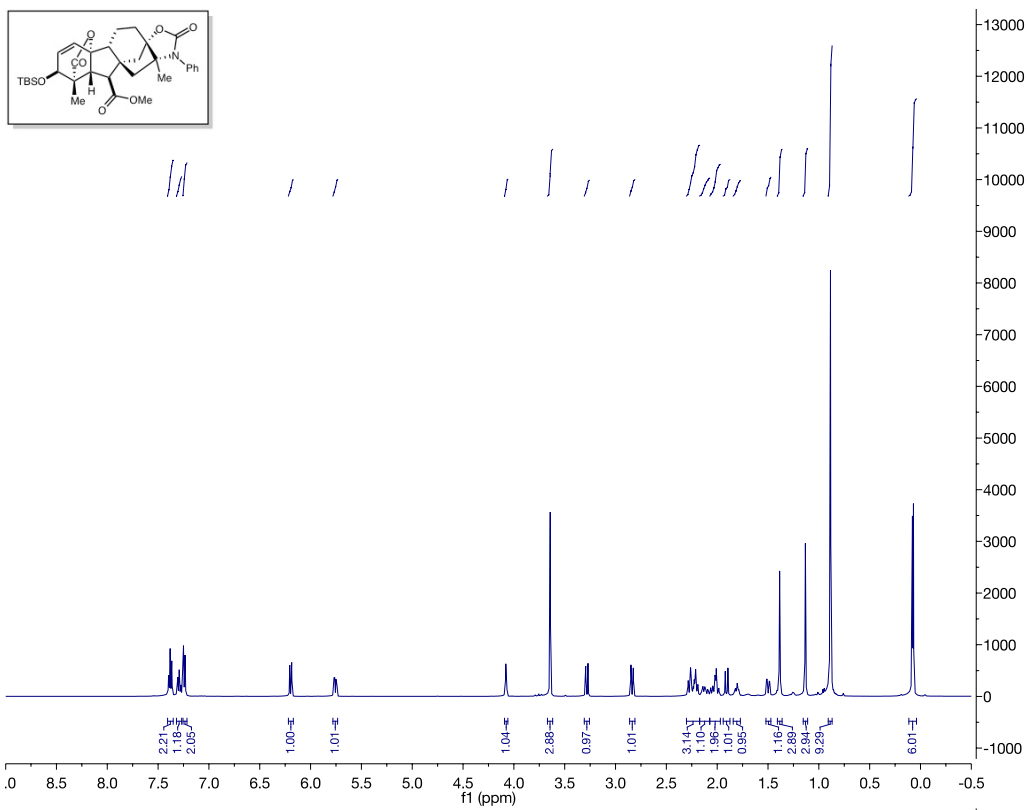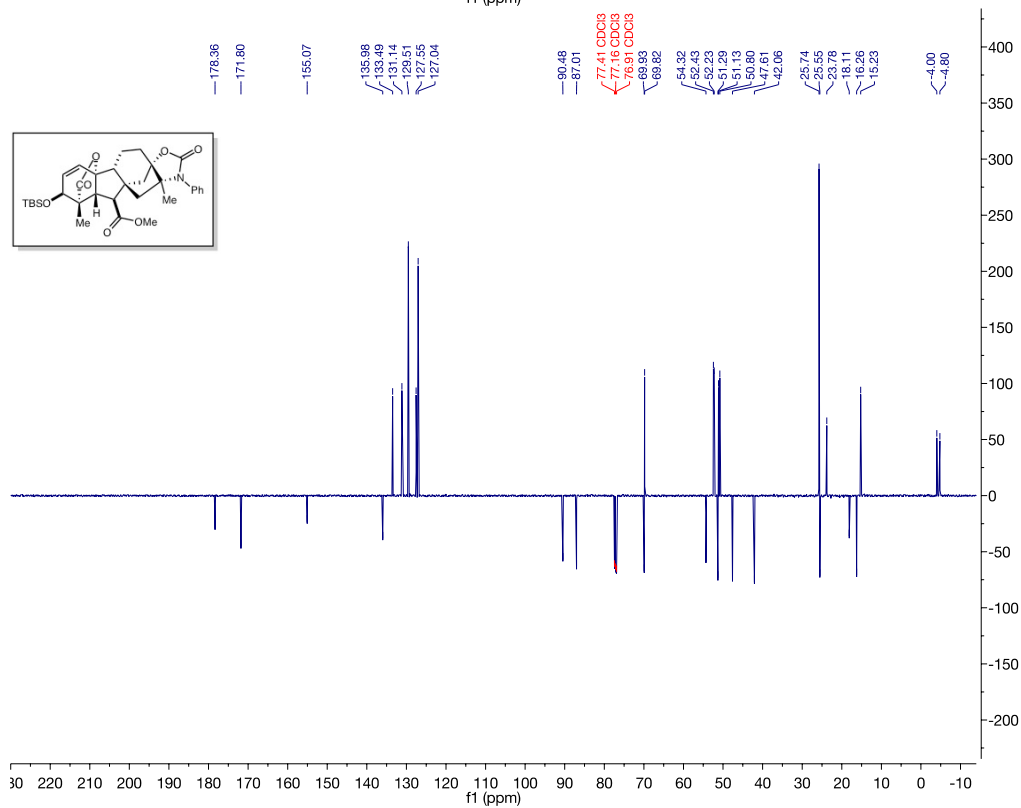

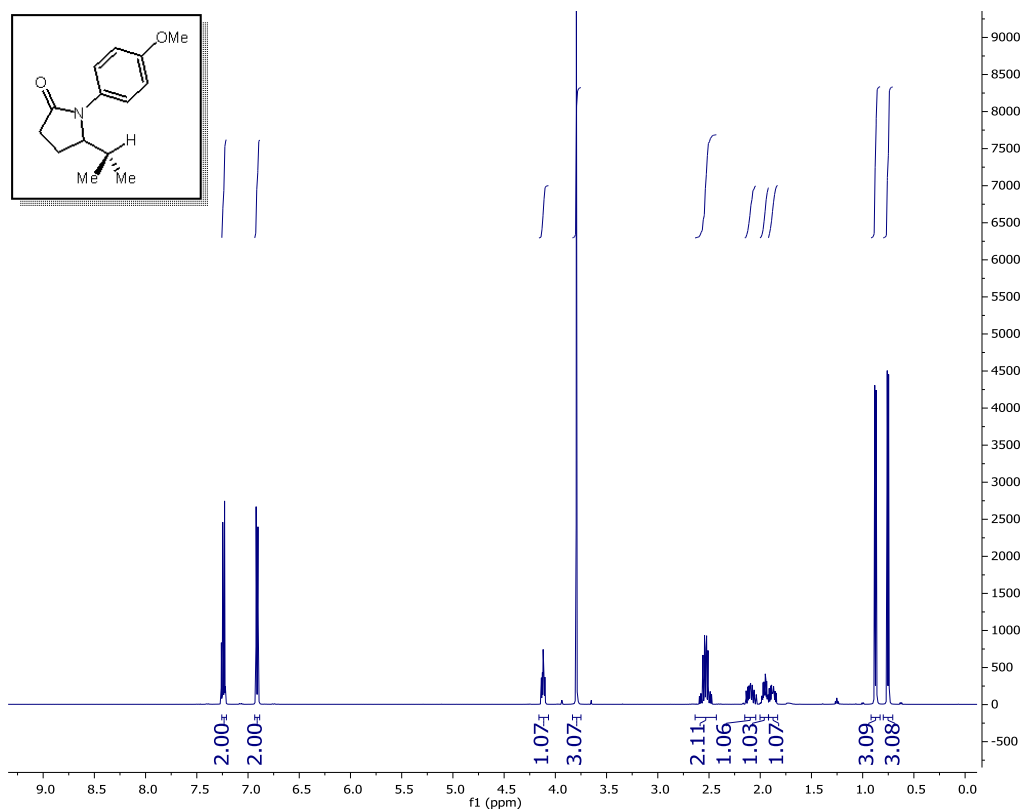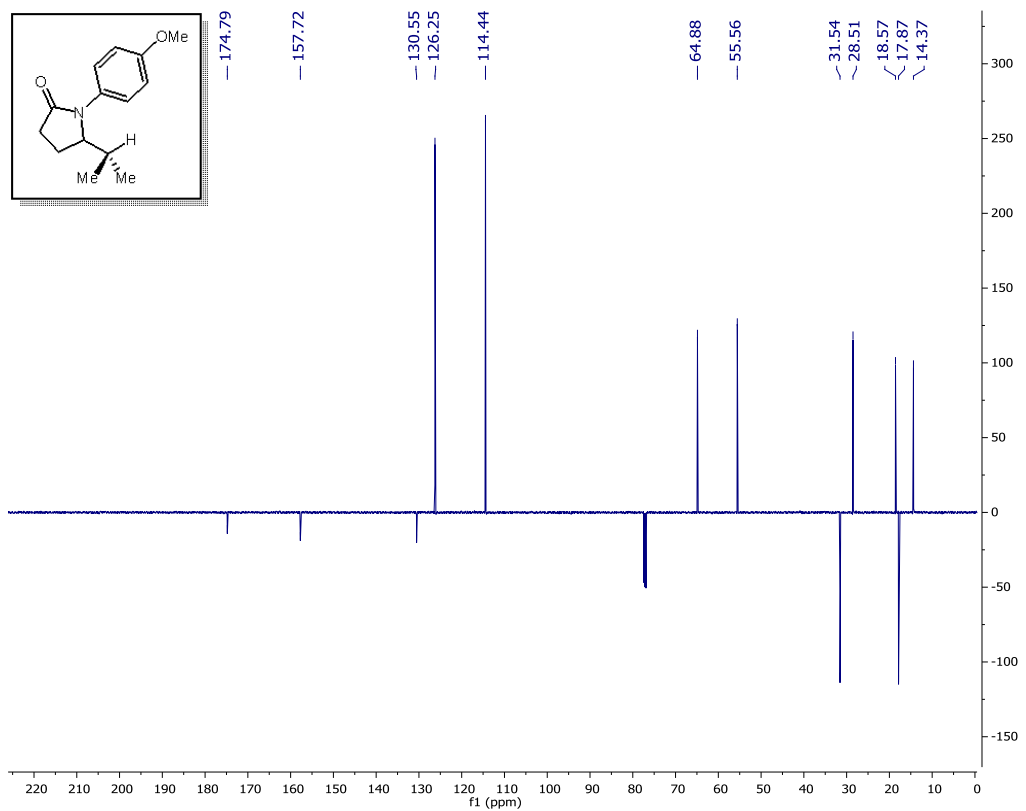

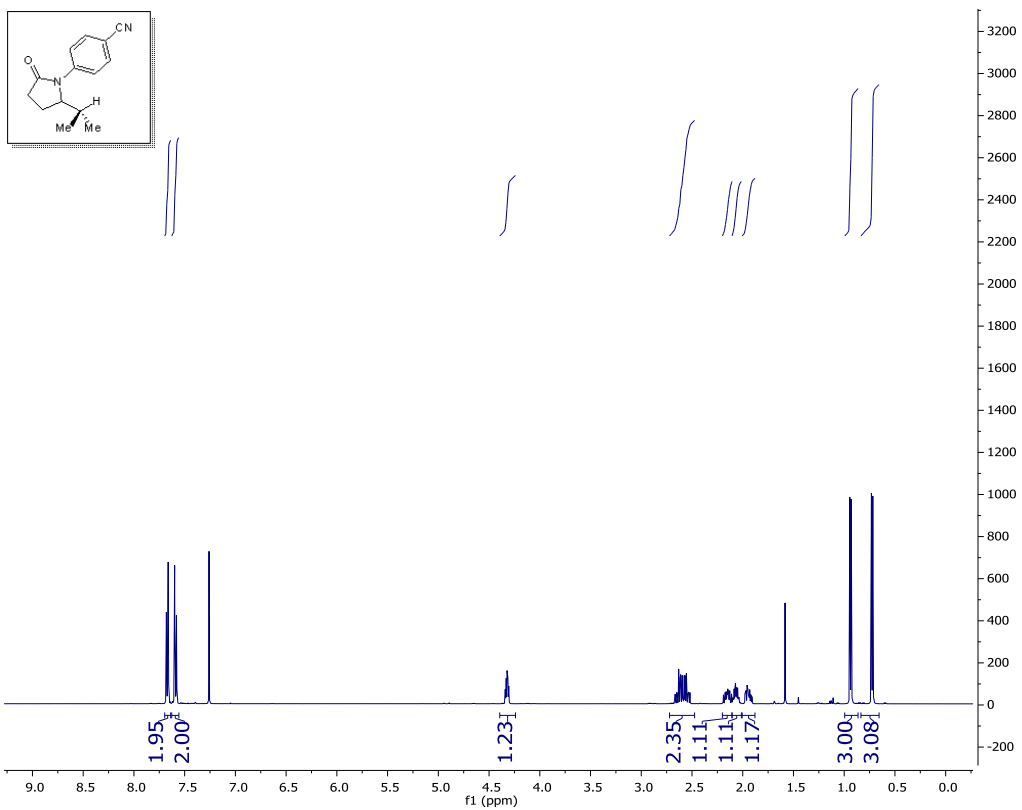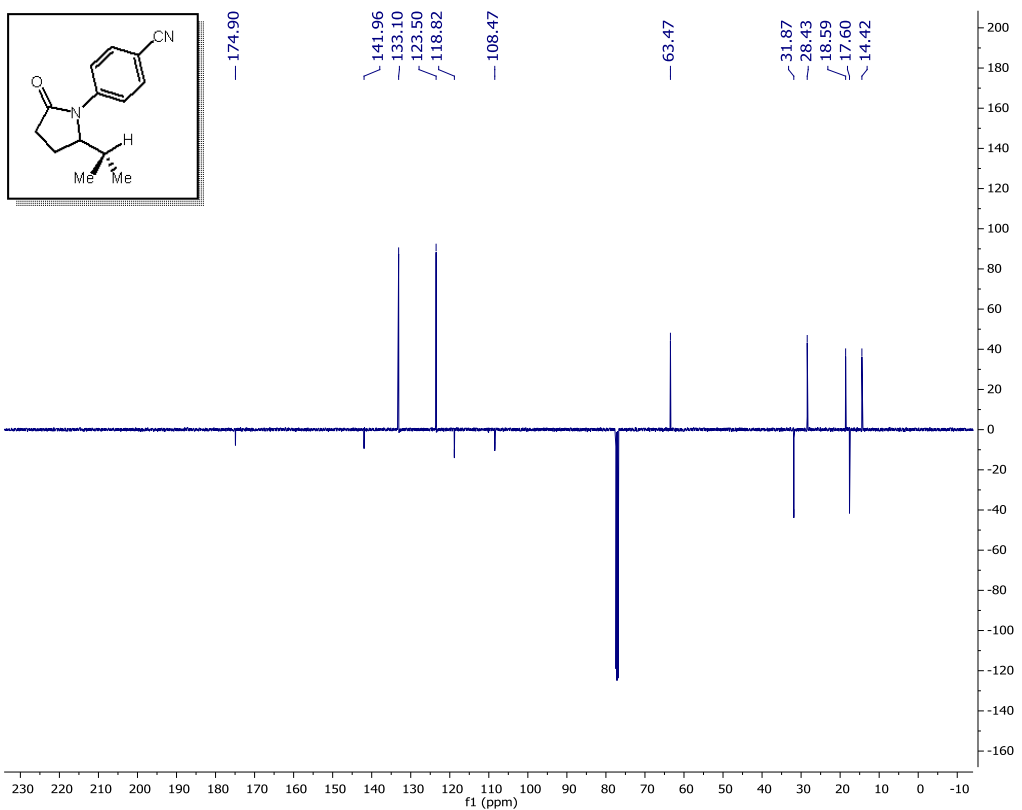

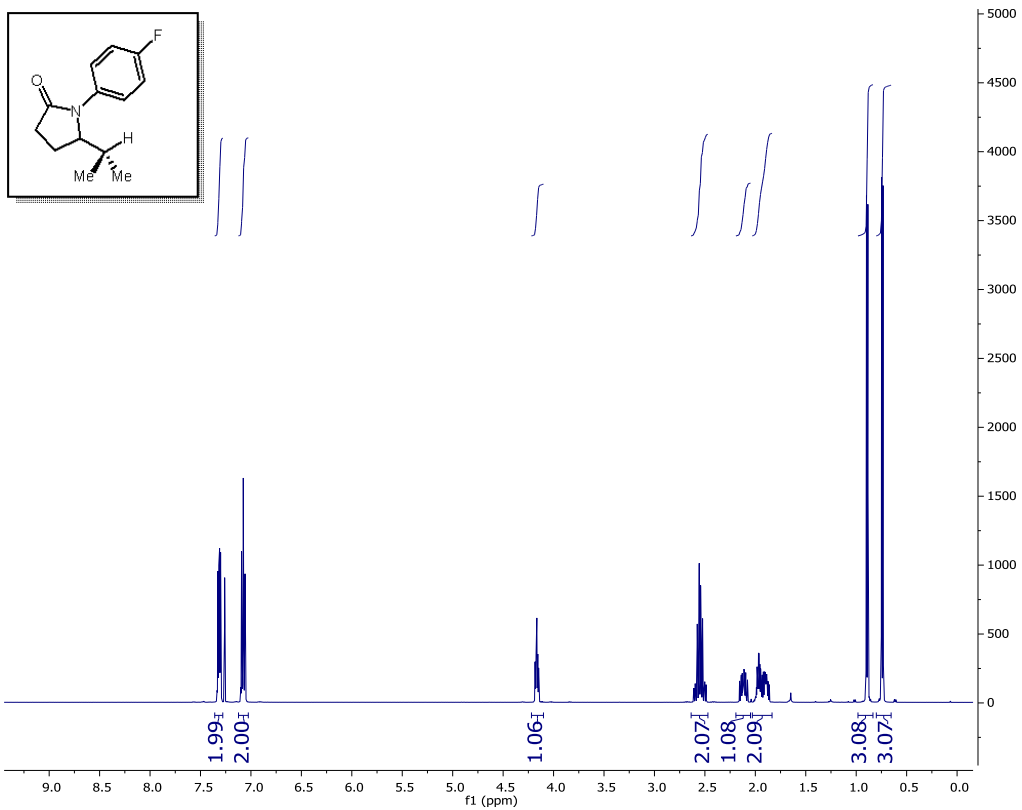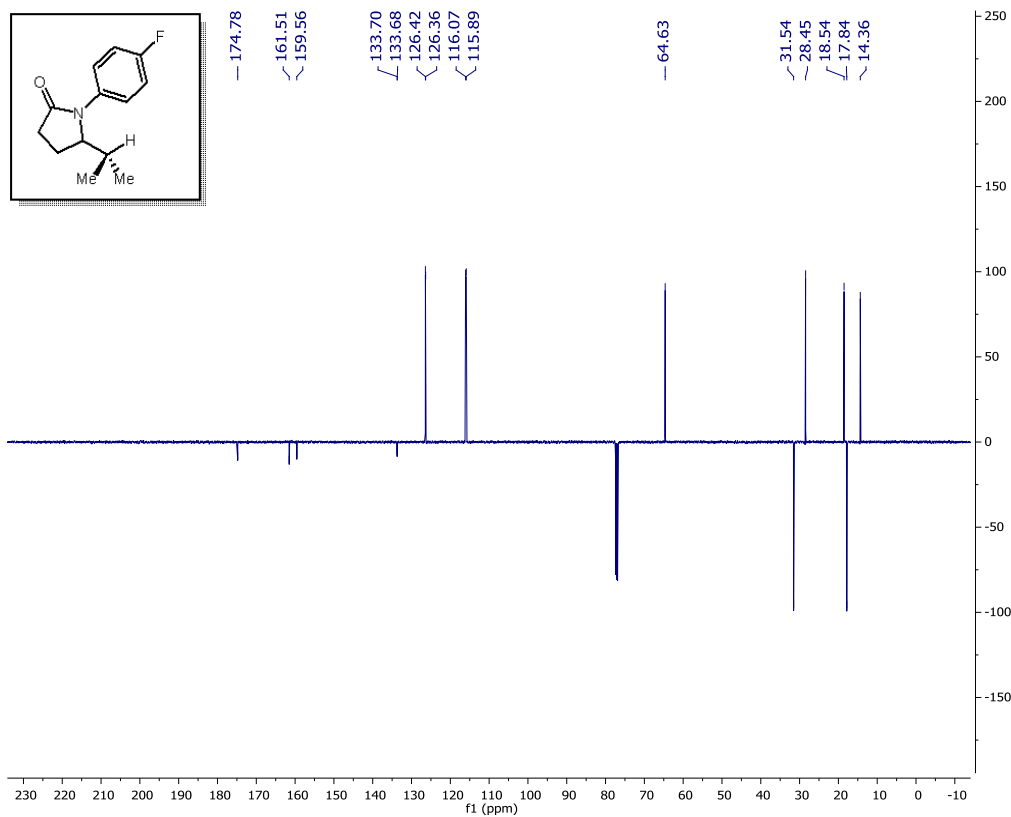

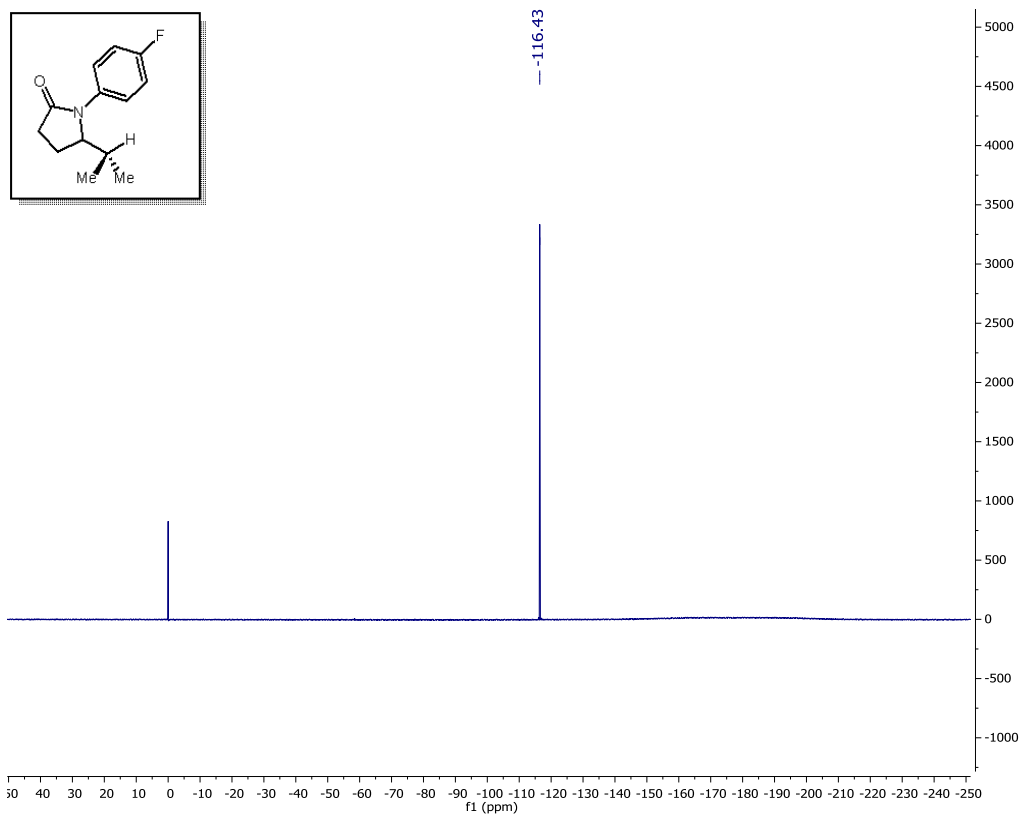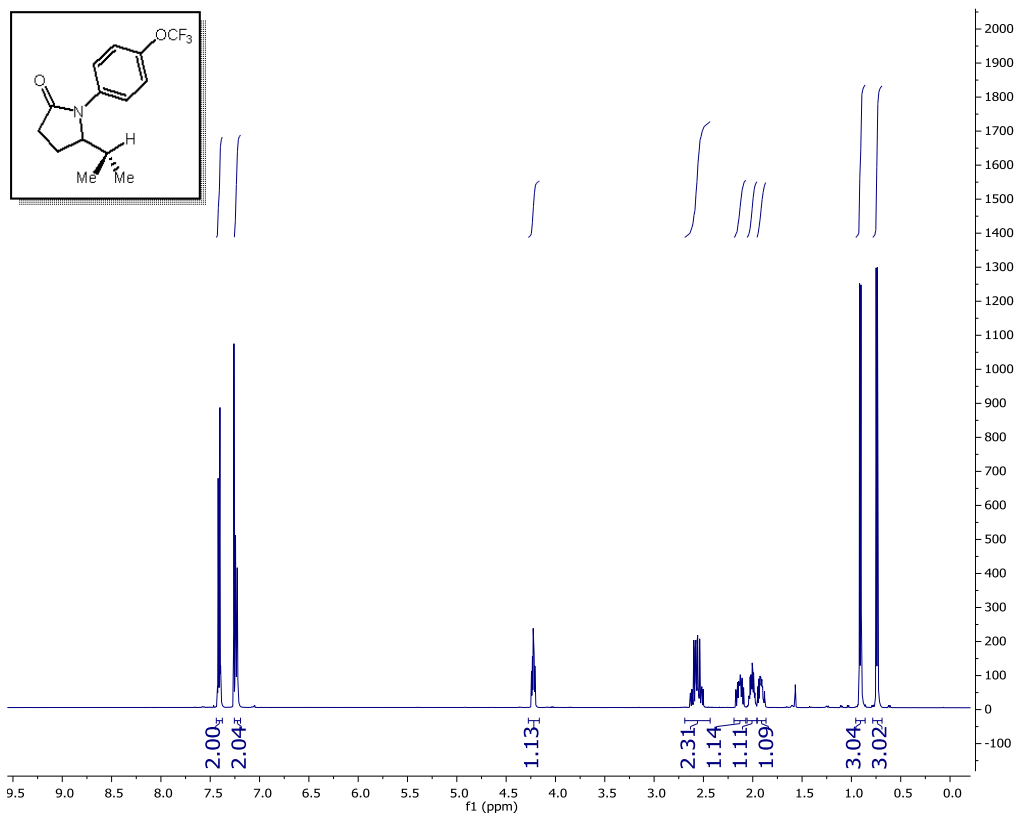

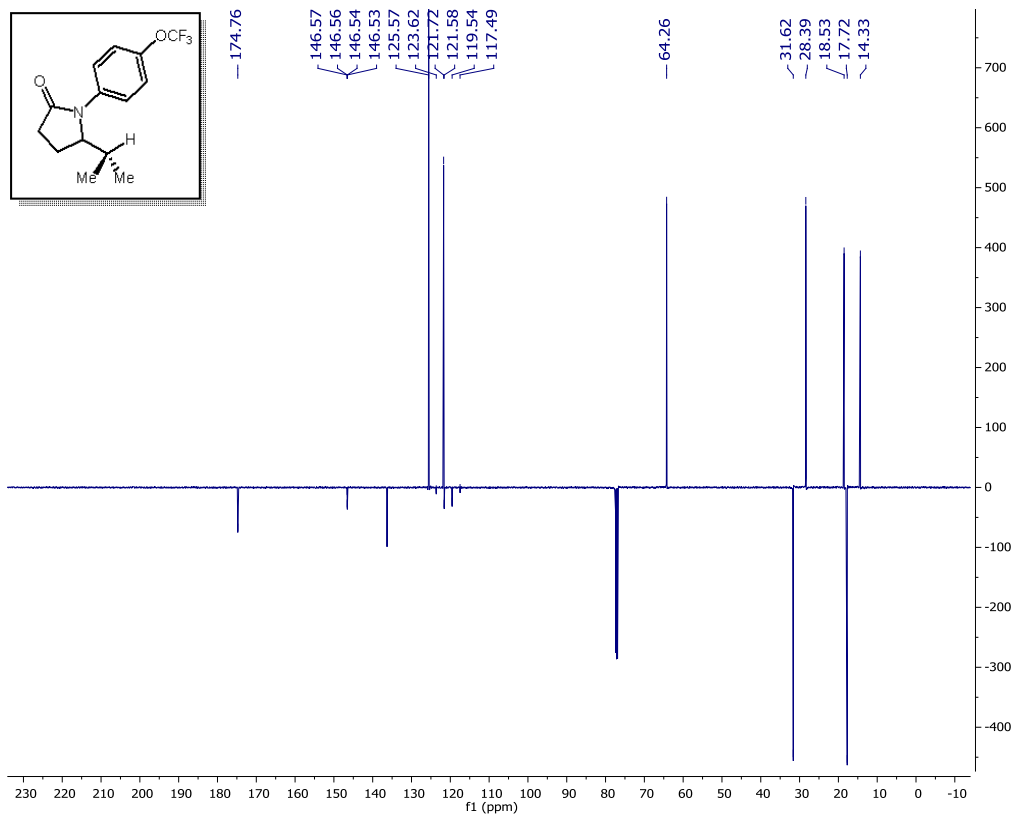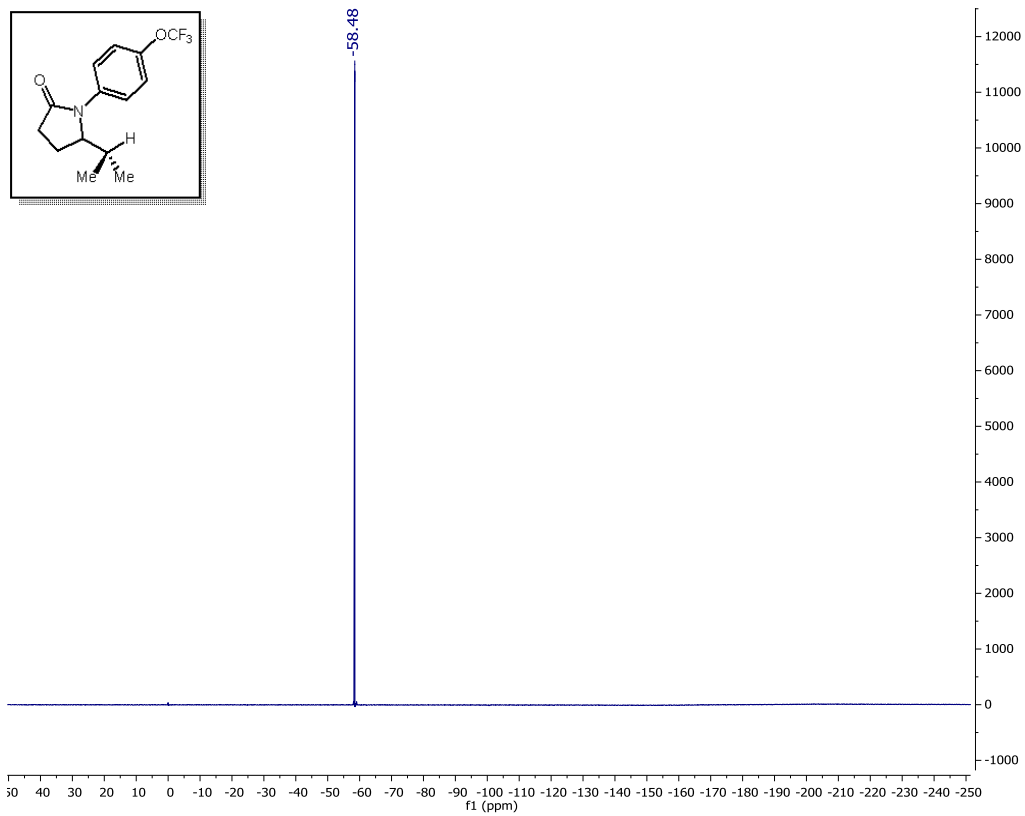

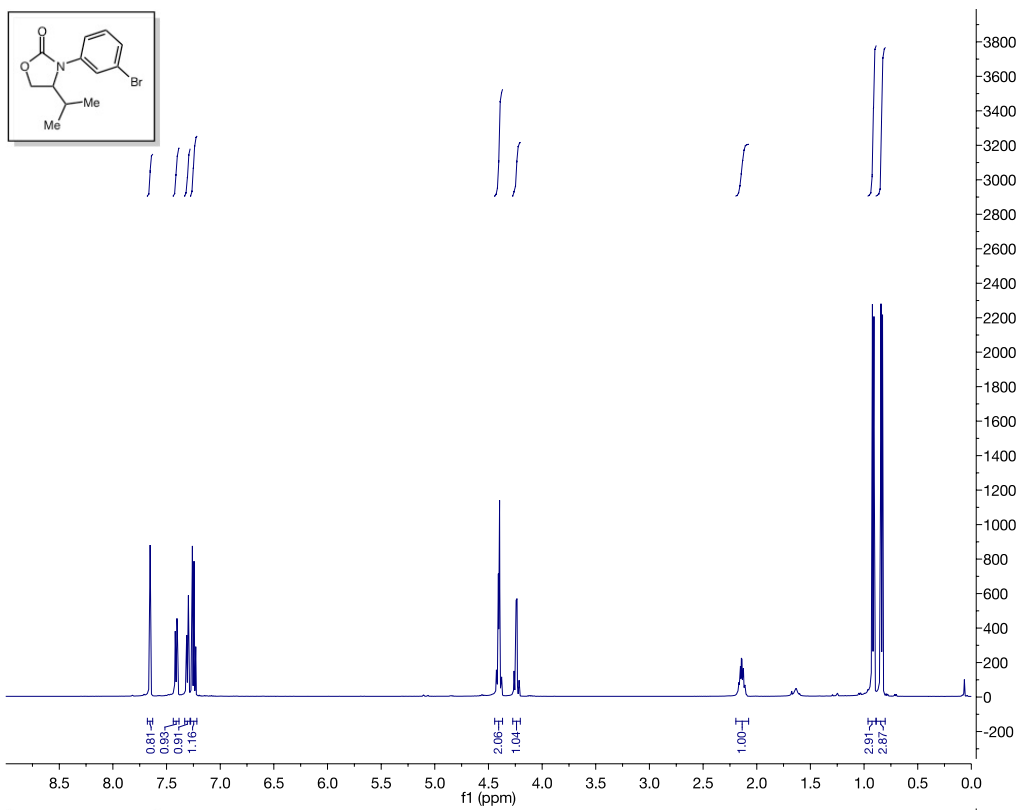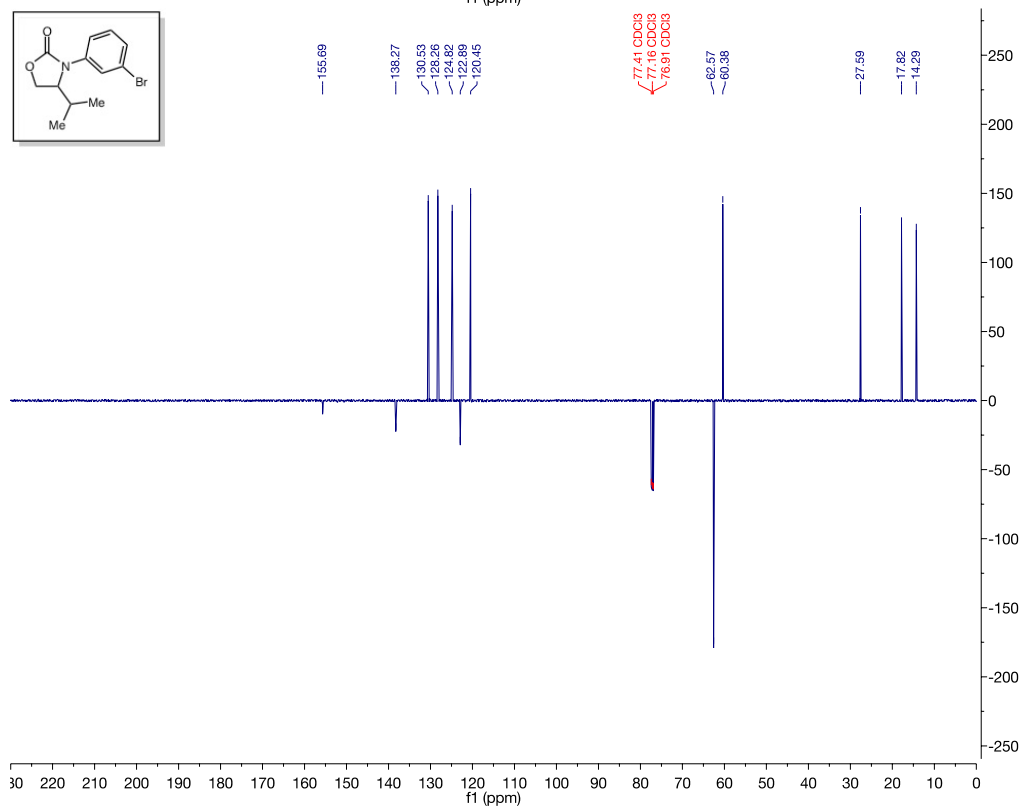

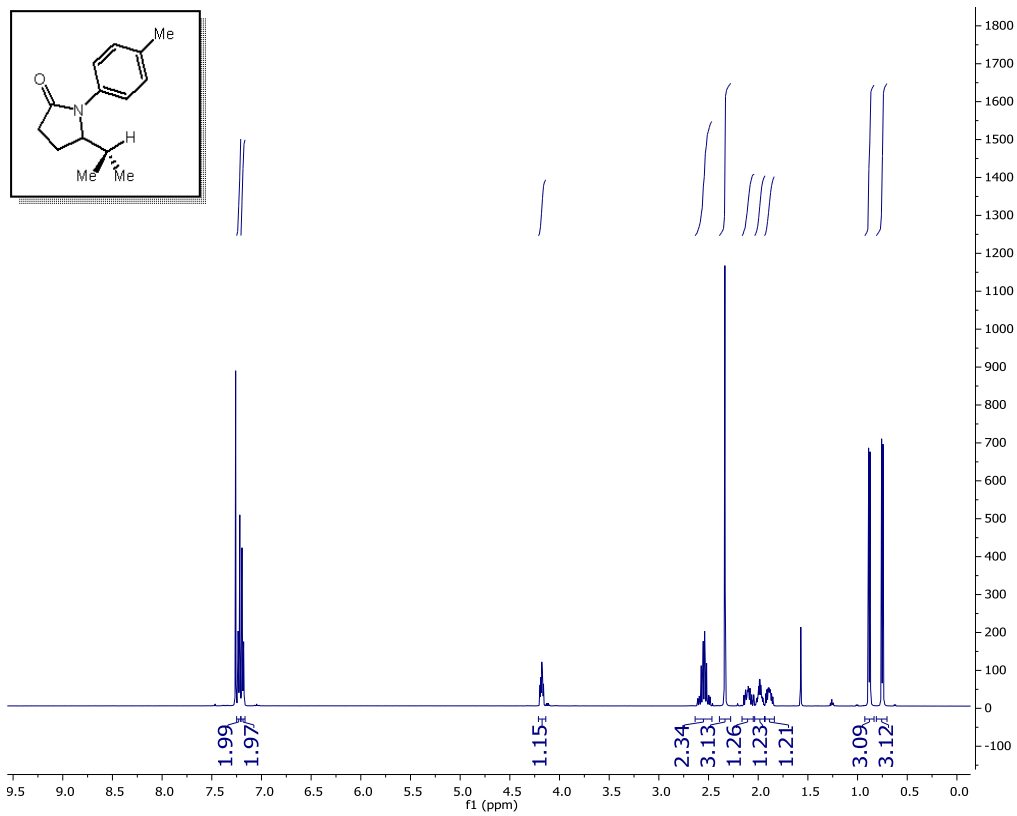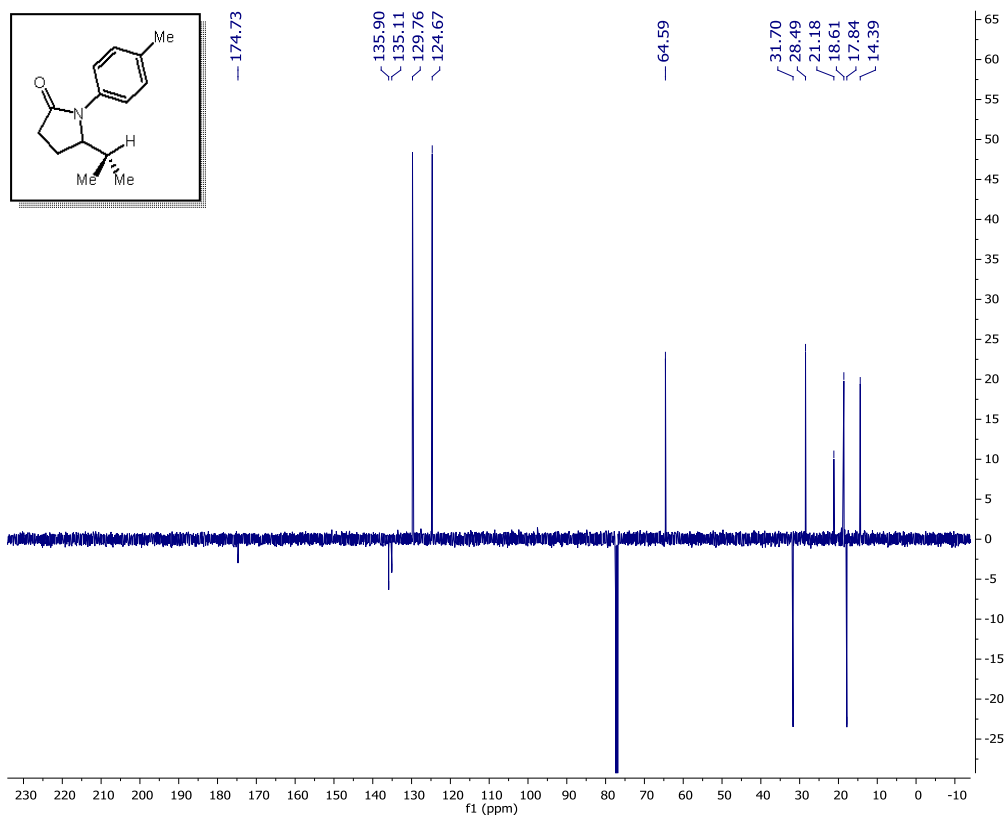



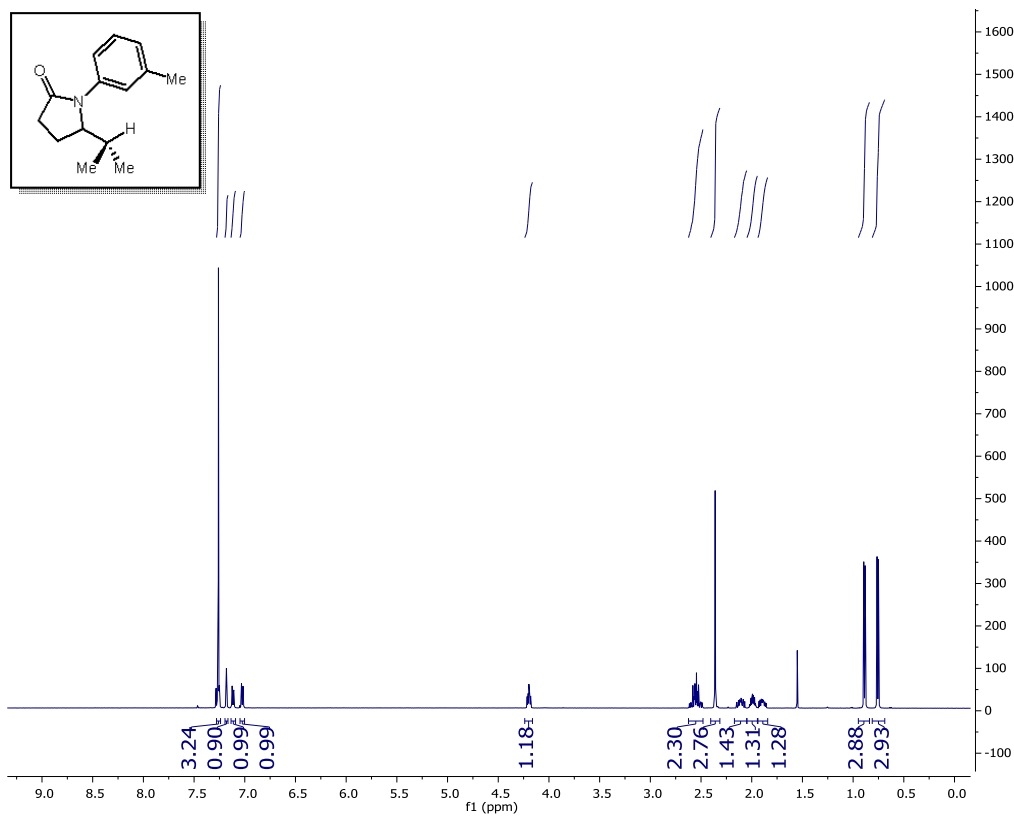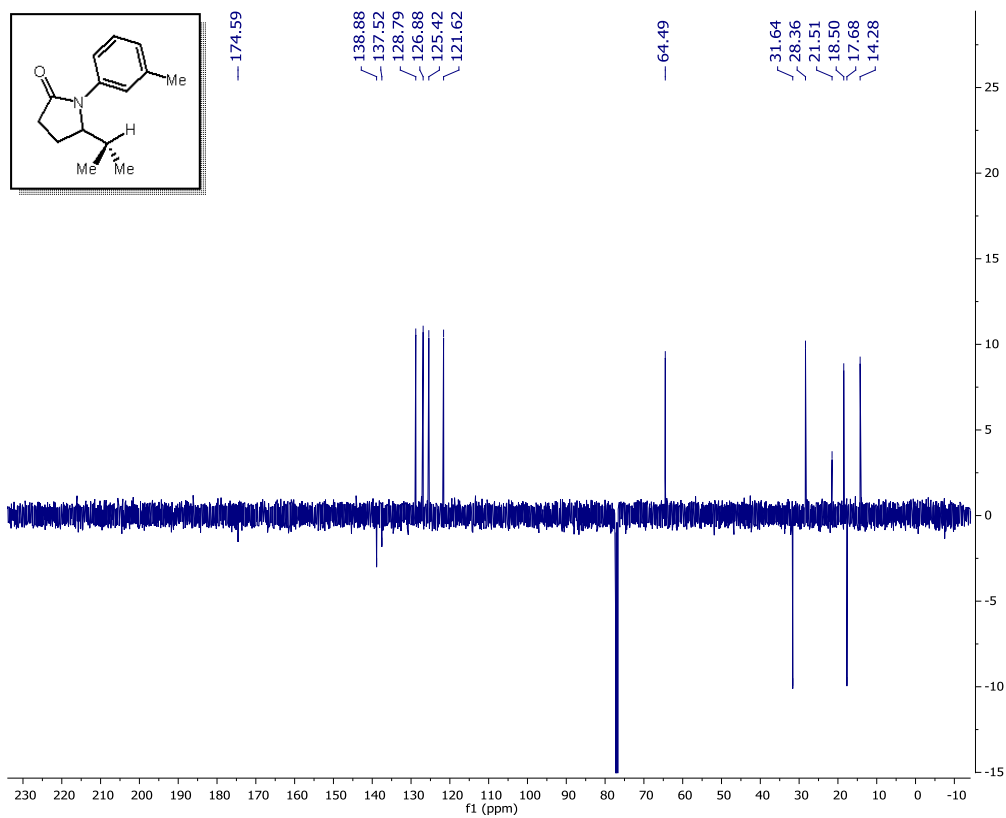

Note: Taken at 120 C in DMSO solvent on a Bruker 300

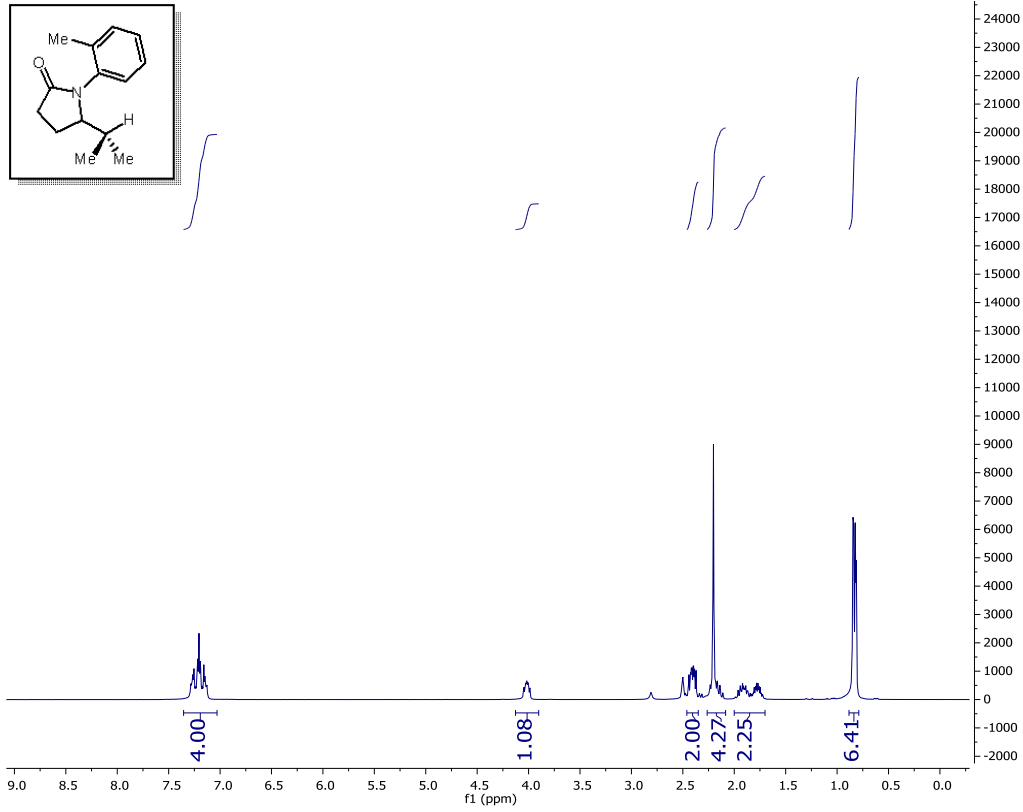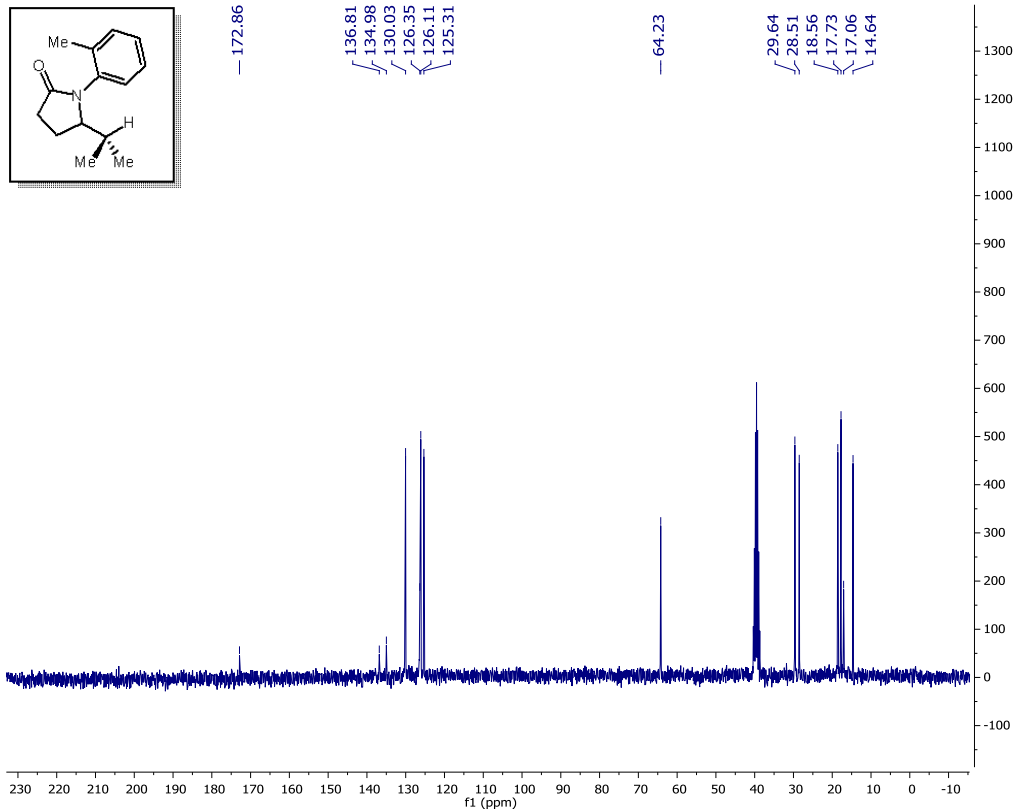

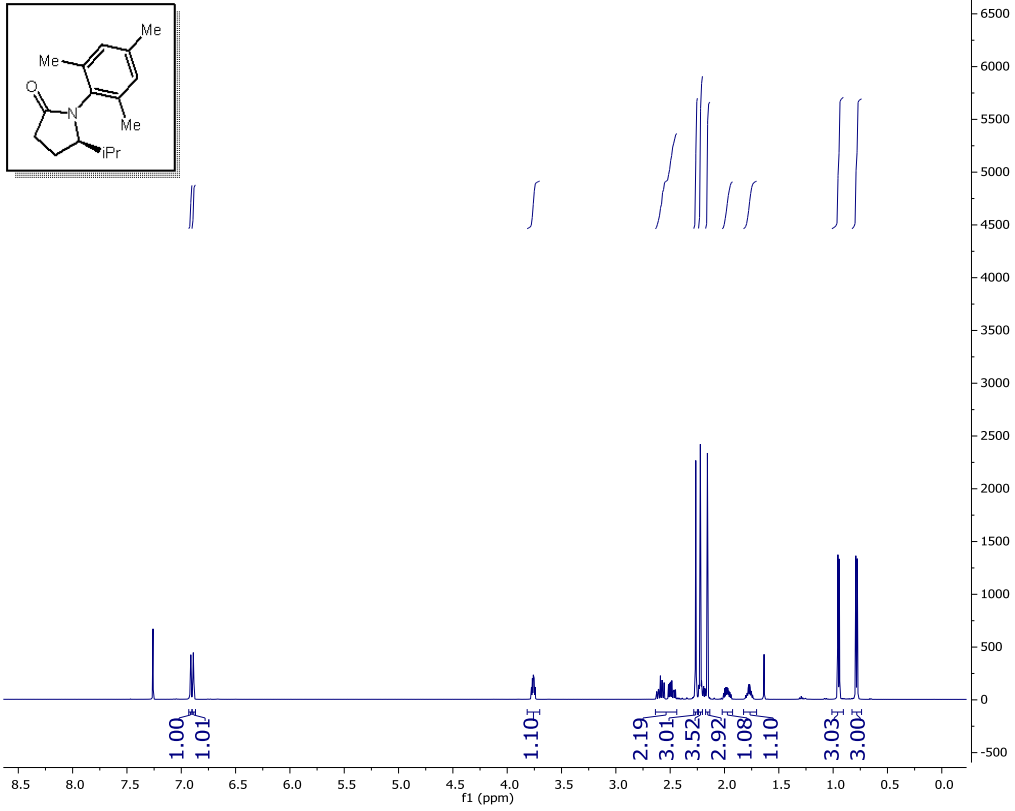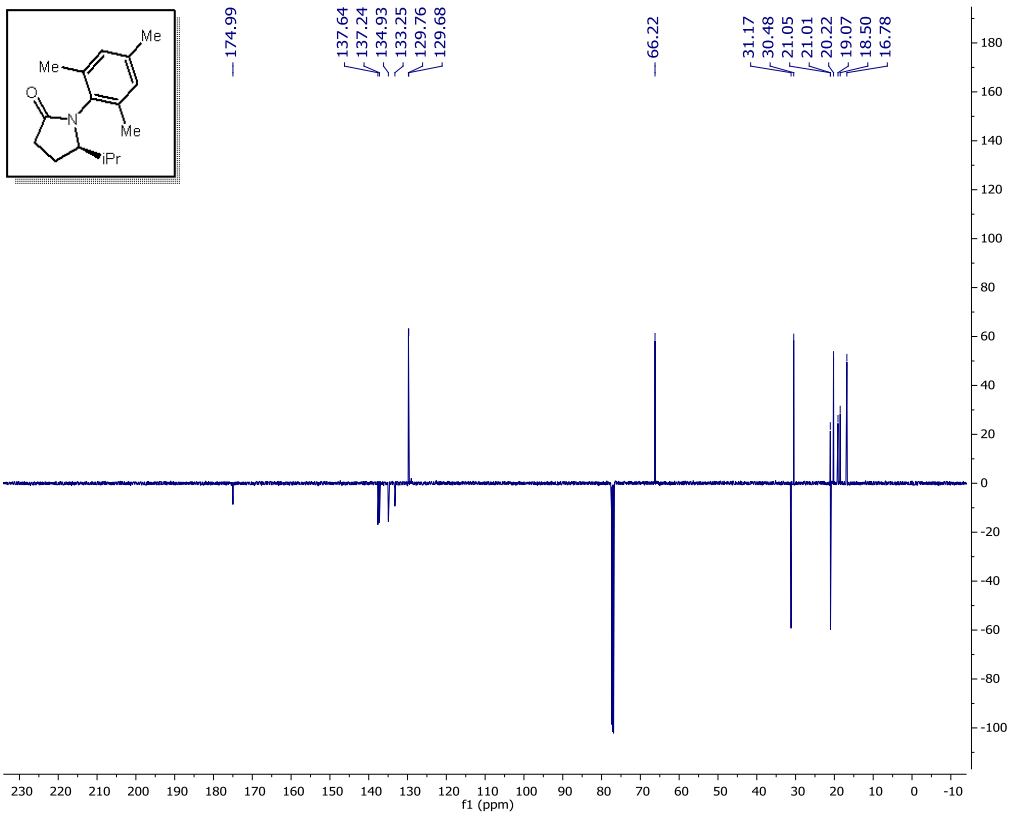

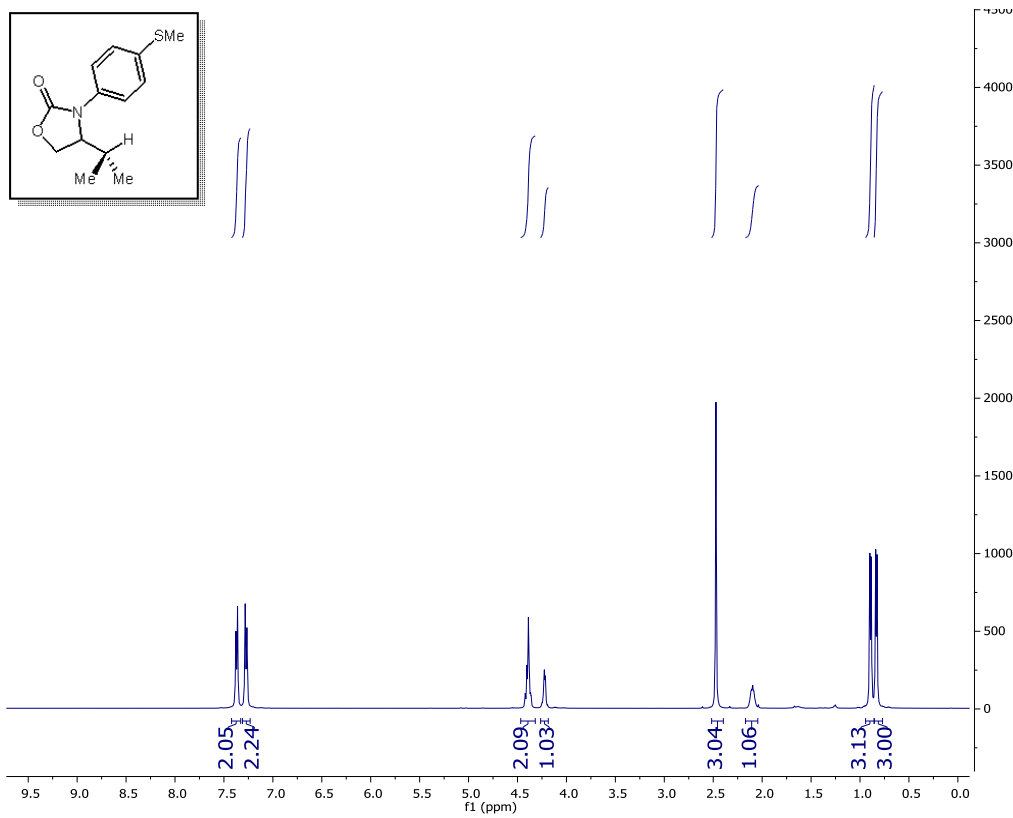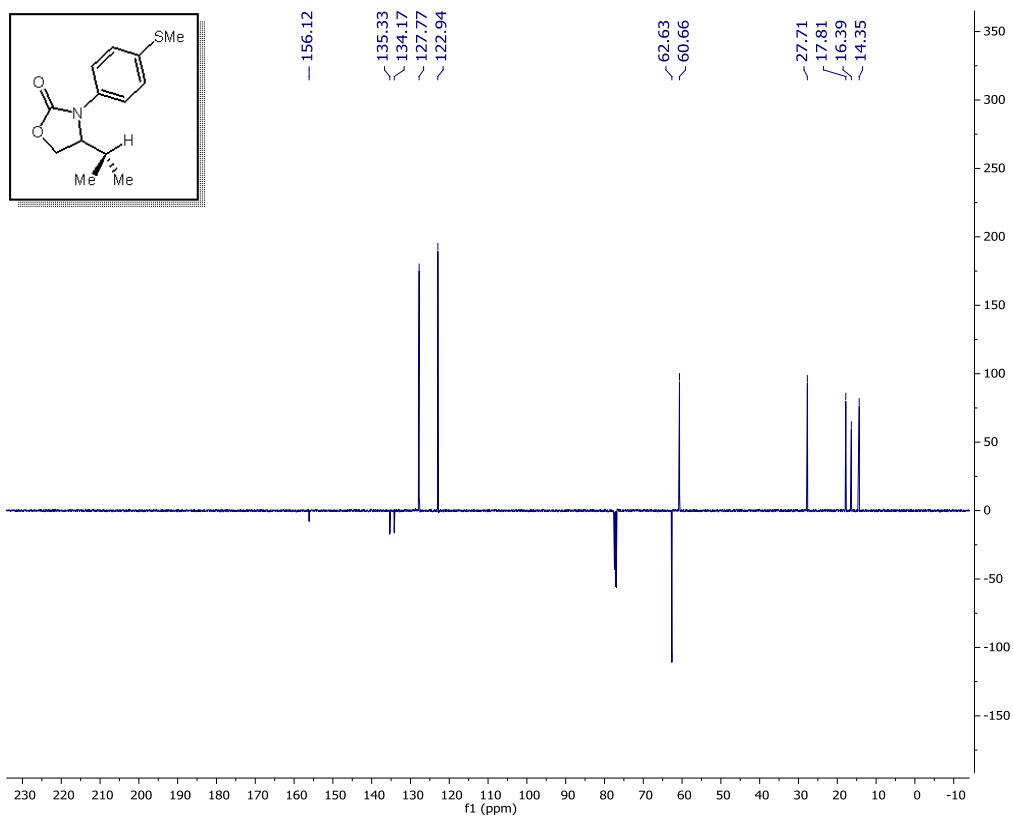

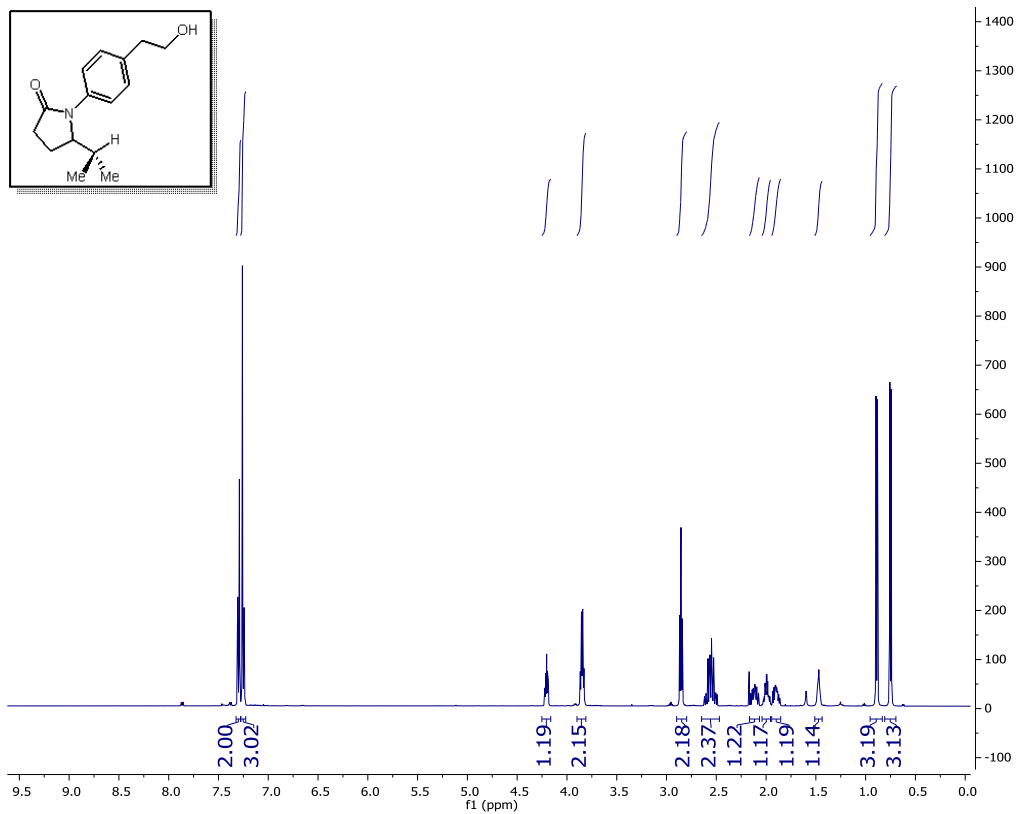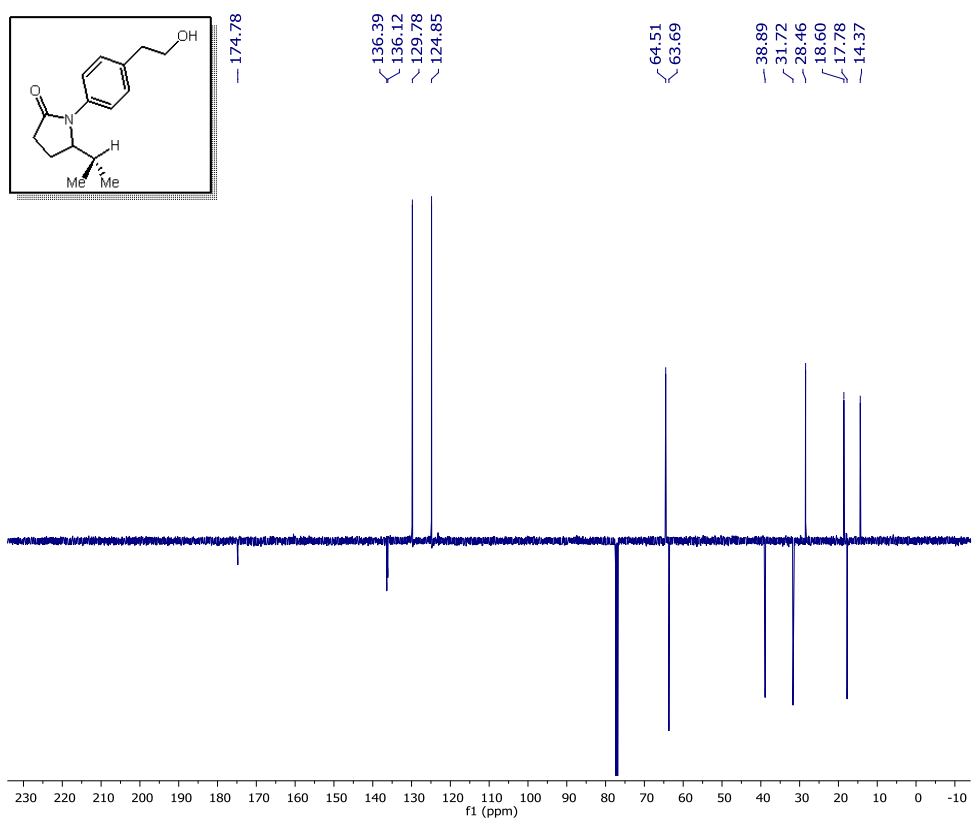

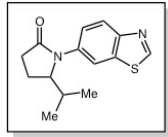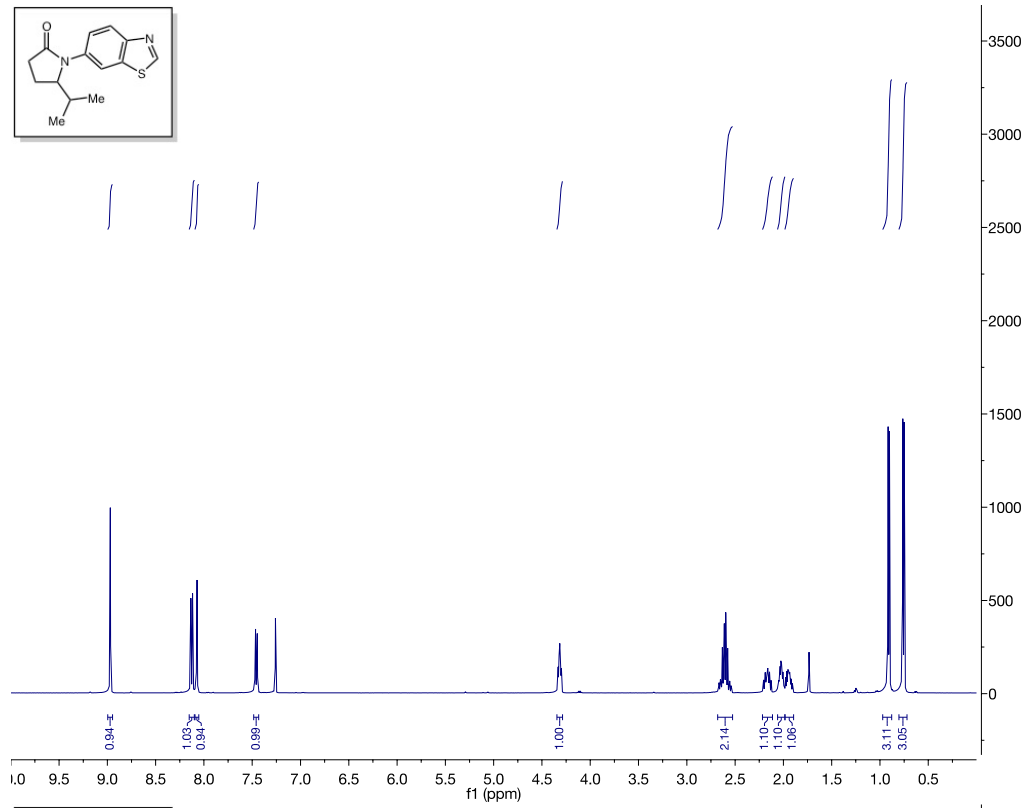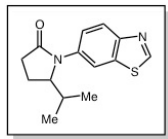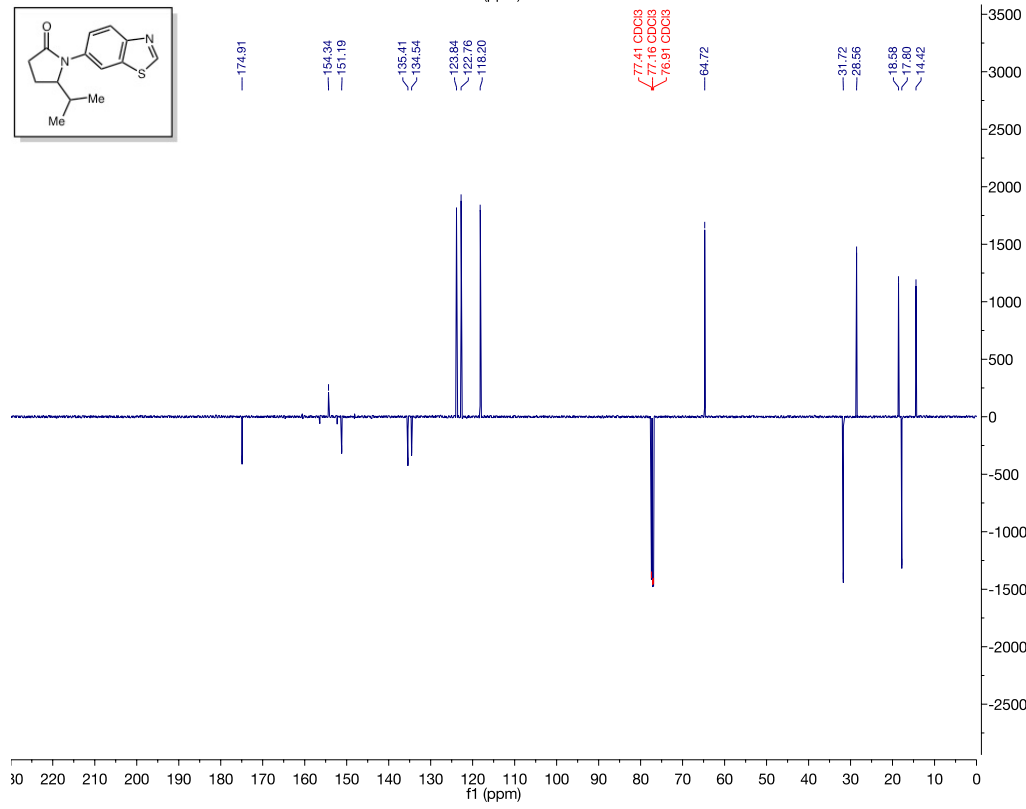

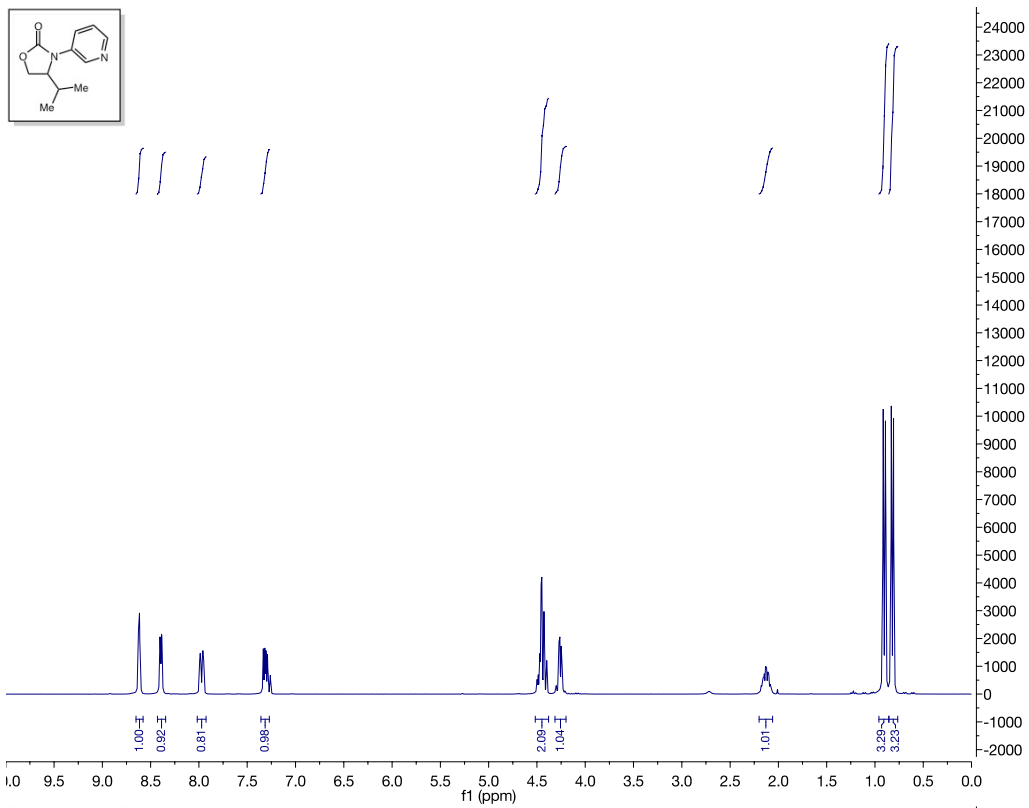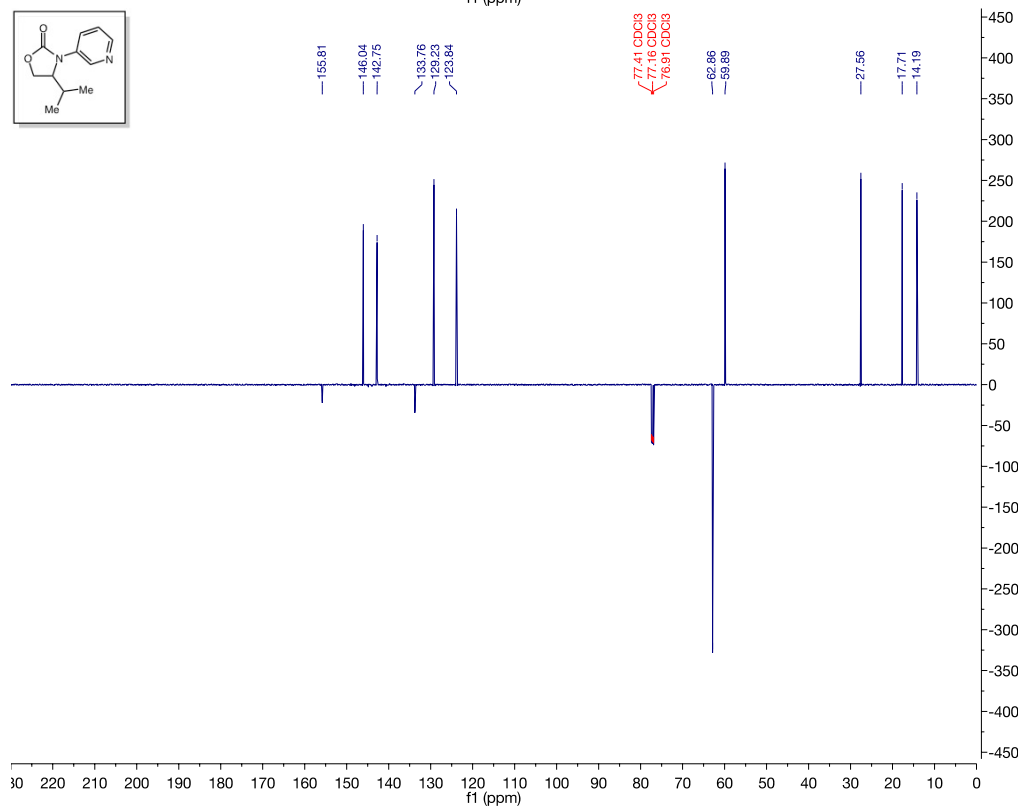

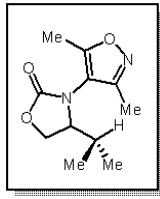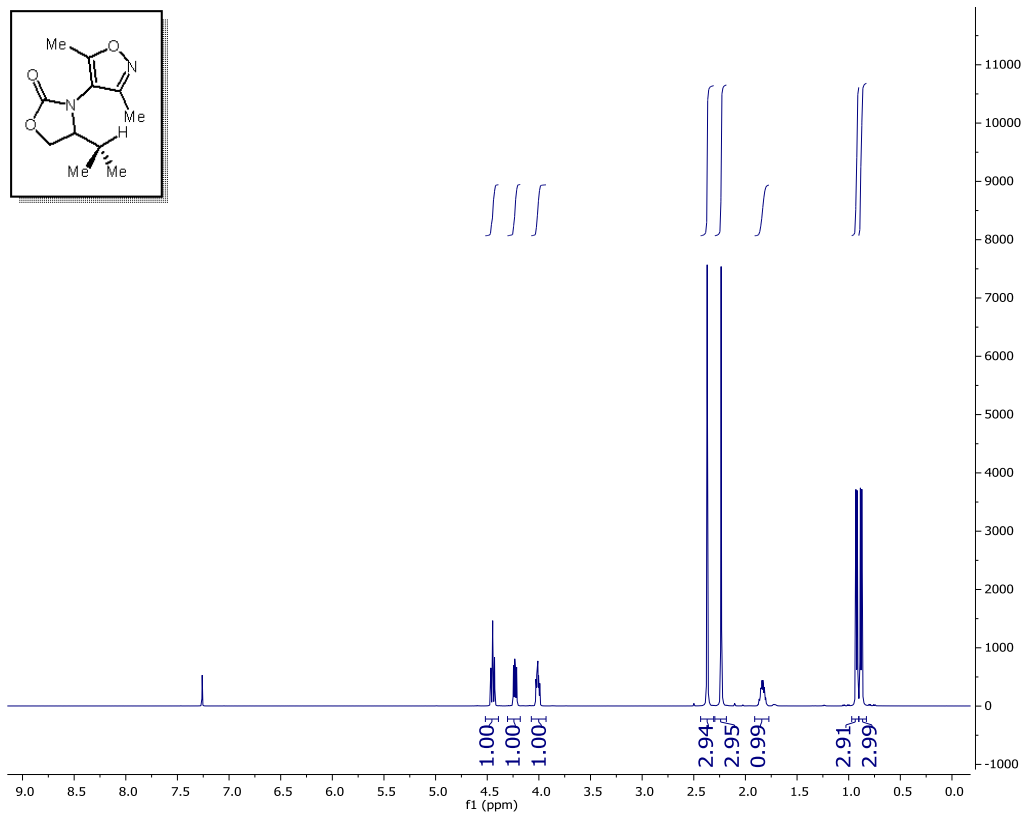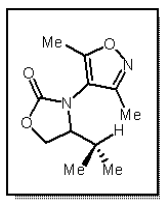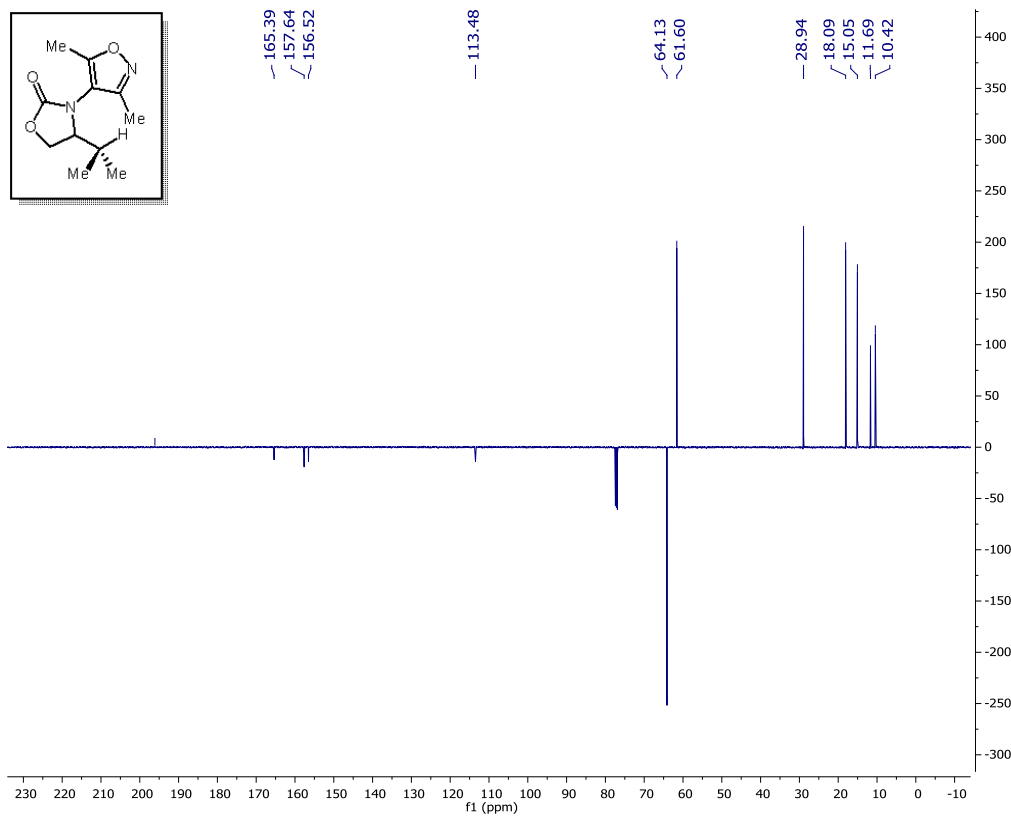



## Diastereomer Identification

4,5-Diisopropyl-3-phenyloxazolidin-2-one:

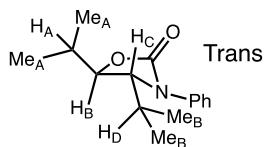

Trans

NOE?

|                                |        |
|--------------------------------|--------|
| H <sub>A</sub> -H <sub>B</sub> | medium |
| H <sub>B</sub> -H <sub>C</sub> | none   |
| H <sub>C</sub> -H <sub>D</sub> | medium |

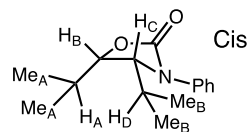

Cis

NOE?

|                                |        |
|--------------------------------|--------|
| H <sub>A</sub> -H <sub>B</sub> | medium |
| H <sub>B</sub> -H <sub>C</sub> | strong |
| H <sub>C</sub> -H <sub>D</sub> | weak   |

4-Ethyl-5-isopropyl-4-methyl-3-phenyloxazolidin-2-one:

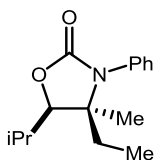

Major

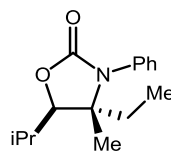

Minor

Diastereomeric assignment made based on allylic strain considerations

4-(6-methylhept-5-en-2-yl)-3-phenyloxazolidin-2-one:

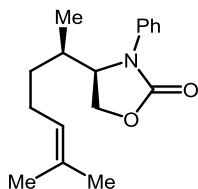

Assigned by analogy given  
crystallographic data of other  
diastereomer

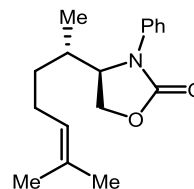

Assigned based on  
crystal structure

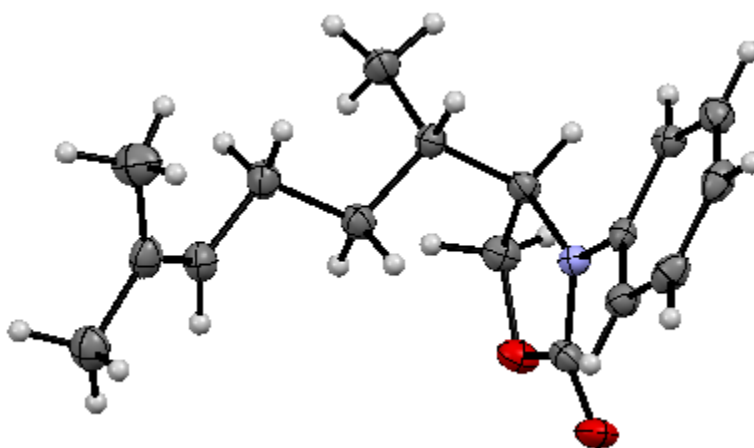

**Figure S.2:** Crystal structure of one diastereomer of 4-(6-methylhept-5-en-2-yl)-3-phenyloxazolidin-2-one. The CheckCIF has Alert Level C and G; the crystal is an inversion twin modeled with a twin fraction of 0.40 (i.e., a 60/40 twin with the supplied structure the majority fraction). For full information, consult the .cif file provided separately in the associated content.

3-phenylhexahydrobenzo[d]oxazol-2(3H)-one:

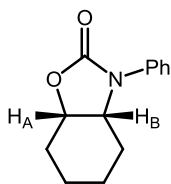

NOE?

H<sub>A</sub>-H<sub>B</sub>

Medium

(3a*S*,6*R*,7a*R*)-3a-Methyl-3-phenyl-6-(prop-1-en-2-yl)hexahydrobenzo[*d*]oxazol-2(3*H*)-one:

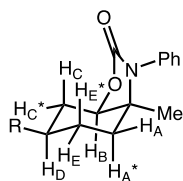

NOE?

|                                  |        |
|----------------------------------|--------|
| H <sub>A</sub> -Me               | weak   |
| H <sub>A</sub> *-H <sub>B</sub>  | medium |
| H <sub>A</sub> *-H <sub>D</sub>  | medium |
| H <sub>B</sub> -H <sub>C</sub> * | weak   |
| H <sub>B</sub> -H <sub>D</sub>   | medium |
| H <sub>C</sub> -H <sub>D</sub>   | none   |
| H <sub>C</sub> -H <sub>E</sub> * | medium |
| H <sub>D</sub> -H <sub>E</sub> * | none   |

(3a*S*,6*S*,7a*R*)-3a-Methyl-3-phenyl-6-(prop-1-en-2-yl)hexahydrobenzo[*d*]oxazol-2(3*H*)-one:

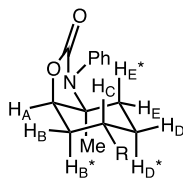

NOE?

|                                  |        |
|----------------------------------|--------|
| H <sub>A</sub> -H <sub>B</sub>   | strong |
| H <sub>B</sub> -H <sub>C</sub>   | medium |
| H <sub>B</sub> *-Me              | weak   |
| H <sub>B</sub> *-H <sub>C</sub>  | none   |
| H <sub>C</sub> -H <sub>D</sub>   | medium |
| H <sub>C</sub> -H <sub>D</sub> * | none   |
| H <sub>C</sub> -H <sub>E</sub> * | medium |
| H <sub>D</sub> *-Me              | weak   |

5-(2-hydroxypropan-2-yl)-3a-methyl-3-phenylhexahydrobenzo[d]oxazol-2(3H)-one

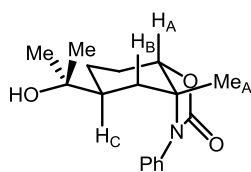

NOE?

Me<sub>A</sub>-H<sub>A</sub> Weak

Me<sub>A</sub>-H<sub>C</sub> None

H<sub>A</sub>-H<sub>B</sub> Weak

1,4-dimethyl-6-phenyl-6-azabicyclo[3.2.1]octan-7-one

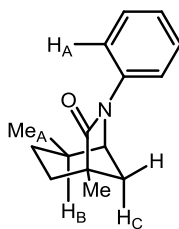

NOE?

Me<sub>A</sub> - H<sub>A</sub>

Weak

Me<sub>A</sub> - H<sub>C</sub>

None

H<sub>A</sub> - H<sub>B</sub>

None

H<sub>B</sub> - H<sub>C</sub>

Medium

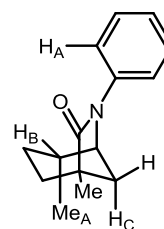

NOE?

None

Medium

Weak

None

2,2-Dimethyl-7-phenylhexahydro-[1,3]dioxino[4',5':5,6]pyrano[3,4-*d*]oxazol-8(6*H*)-one:

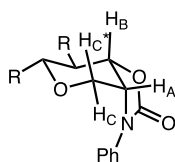

NOE?

|                                  |        |
|----------------------------------|--------|
| H <sub>A</sub> -H <sub>B</sub>   | strong |
| H <sub>A</sub> -H <sub>C</sub>   | medium |
| H <sub>A</sub> -H <sub>C</sub> * | none   |
| H <sub>A</sub> -Ph               | strong |
| H <sub>B</sub> -H <sub>C</sub>   | none   |
| H <sub>B</sub> -H <sub>C</sub> * | strong |
| H <sub>C</sub> -Ph               | strong |
| H <sub>C</sub> *-Ph              | none   |

7-(Benzyloxy)-6-(((*tert*-butyldimethylsilyl)oxy)methyl)-3-phenylhexahydro-2*H*-pyrano[3,4-*d*]oxazol-2-one:

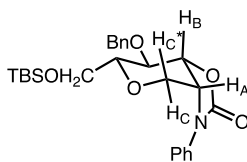

NOE?

|                                  |        |
|----------------------------------|--------|
| H <sub>A</sub> -H <sub>B</sub>   | strong |
| H <sub>A</sub> -H <sub>C</sub>   | strong |
| H <sub>A</sub> -H <sub>C</sub> * | weak   |
| H <sub>A</sub> -Ph               | strong |
| H <sub>B</sub> -H <sub>C</sub>   | none   |
| H <sub>B</sub> -H <sub>C</sub> * | strong |
| H <sub>C</sub> -Ph               | medium |
| H <sub>C</sub> *-Ph              | none   |

4-isopropyl-6,6-dimethyl-3-phenyl-3-azabicyclo[3.1.0]hexan-2-one

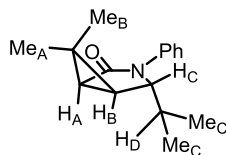

Me<sub>C</sub> protons are not equivalent but exact assignment is not necessary for analysis

|                                  | NOE?   |
|----------------------------------|--------|
| Me <sub>A</sub> -H <sub>A</sub>  | Strong |
| Me <sub>A</sub> -H <sub>B</sub>  | Medium |
| Me <sub>B</sub> -H <sub>C</sub>  | Strong |
| Me <sub>C</sub> -H <sub>A</sub>  | Medium |
| Me <sub>B</sub> -H <sub>D</sub>  | None   |
| Me <sub>B</sub> -Me <sub>C</sub> | None   |

8-Acetyl-5a,7a-dimethyl-1-phenylhexadecahydro-1*H*-cyclopenta[7,8]phenanthro[1,2-*d*]oxazol-2(12*bH*)-one:

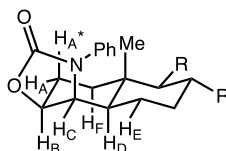

NOE?

|                                 |        |
|---------------------------------|--------|
| H <sub>A</sub> -H <sub>B</sub>  | medium |
| H <sub>A</sub> *-H <sub>B</sub> | none   |
| H <sub>B</sub> -H <sub>C</sub>  | strong |
| H <sub>B</sub> -H <sub>D</sub>  | medium |
| H <sub>B</sub> -H <sub>F</sub>  | weak   |
| H <sub>B</sub> -H <sub>D</sub>  | weak   |
| H <sub>C</sub> -H <sub>D</sub>  | strong |
| H <sub>C</sub> -H <sub>E</sub>  | medium |

Methyl 7-((*tert*-butyldimethylsilyl)oxy)-3a,6-dimethyl-2,14-dioxo-3-phenyl-3,3a,4,5,5a,6,7,9b,10,11-decahydro-2*H*-9a,6-(epoxymethano)-4a,11a-methanobenzo[1,2]azuleno[5,6-*d*]oxazole-5-carboxylate

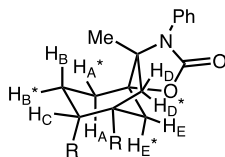

NOE?

|                                 |        |
|---------------------------------|--------|
| H <sub>A</sub> *-Me             | weak   |
| H <sub>B</sub> -Me              | medium |
| H <sub>D</sub> *-H <sub>E</sub> | medium |
| H <sub>D</sub> *-Me             | none   |
| H <sub>E</sub> -Me              | none   |

## Stern Volmer Quenching Studies

Stern-Volmer experiments were conducted on an Agilent Technologies Cary Eclipse Fluorescence Spectrophotometer using the Cary Eclipse Scan Application. Solutions of each component were prepared prior to each set of experiments in dichloromethane solvent. The solutions were irradiated at 370 nm and luminescence was measured at 498 nm. In cases where quenching is observed, each experiment is run in triplicate; if no quenching is observed, the experiment is run in duplicate to validate the first result.  $I_0/I$  values per run are generated from the average of all three scans per data point. For determination of  $K_{sv}$ , the value for  $I_0/I$  from each run is averaged to yield an  $I_0/I$  value for the experiment and comprises nine total measurements of  $I_0/I$ . Linear regression of  $I_0/I$  against concentration to yield  $K_{sv}$  is done in Microsoft Excel.

### Experiment 1: Constant Iridium; Varied Thiophenol

| Species                                                                        | Concentration (mM) |
|--------------------------------------------------------------------------------|--------------------|
| [Ir(dF(CF <sub>3</sub> )ppy) <sub>2</sub> (bpy)](PF <sub>6</sub> )             | 0.005              |
| Bu <sub>4</sub> N <sup>+</sup> (BuO) <sub>2</sub> PO <sub>2</sub> <sup>-</sup> | 0                  |
| Thiophenol                                                                     | Varied             |
| Acetanilide                                                                    | 0                  |

| Run | [PhSH] mM | Scan 1  | Scan 2  | Scan 3  | Average | $I_0/I$ |
|-----|-----------|---------|---------|---------|---------|---------|
| #1  | 0         | 433.089 | 437.541 | 431.302 | 433.977 | 1.00    |
|     | 0.25      | 439.160 | 441.732 | 446.166 | 442.353 | 0.98    |
|     | 0.50      | 442.932 | 441.732 | 446.166 | 433.610 | 0.98    |
|     | 0.75      | 450.662 | 454.251 | 453.451 | 452.788 | 0.96    |
|     | 1.00      | 441.382 | 450.429 | 445.279 | 445.697 | 0.97    |
| #2  | 0         | 434.578 | 434.778 | 436.549 | 435.302 | 1.00    |
|     | 0.25      | 433.787 | 434.280 | 431.796 | 433.288 | 1.00    |
|     | 0.50      | 444.450 | 446.640 | 444.089 | 445.060 | 0.98    |
|     | 0.75      | 457.736 | 453.576 | 458.349 | 456.554 | 0.95    |
|     | 1.00      | 441.382 | 443.612 | 443.165 | 450     | 0.98    |

**Table S.1:** Relevant concentrations and tabulated quenching data for Experiment 1.

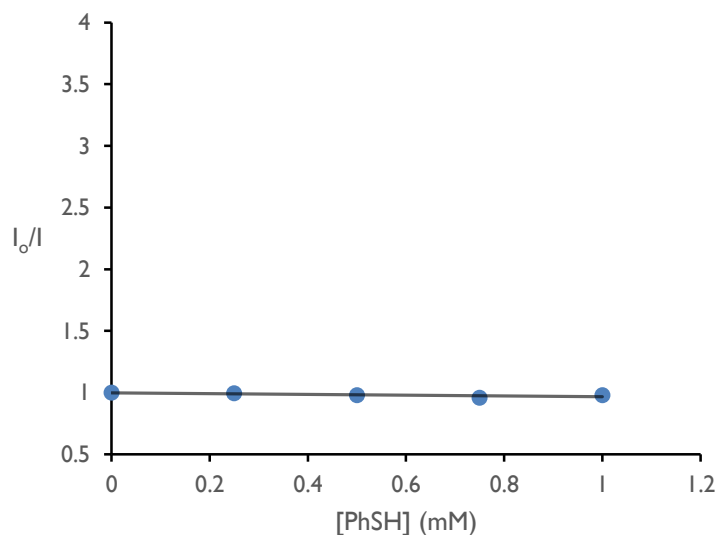



**Figure S.3:** Graphical representation of  $I_0/I$  data collected in Experiment 1.

## Experiment 2: Constant Iridium; Varied Amide

| Species                                                                        | Concentration (mM) |
|--------------------------------------------------------------------------------|--------------------|
| [Ir(dF(CF <sub>3</sub> )ppy) <sub>2</sub> (bpy)](PF <sub>6</sub> )             | 0.01               |
| Bu <sub>4</sub> N <sup>+</sup> (BuO) <sub>2</sub> PO <sub>2</sub> <sup>-</sup> | 0                  |
| Thiophenol                                                                     | 0                  |
| Acetanilide                                                                    | Varied             |

| Run | [Acetanilide] mM | Scan 1  | Scan 2  | Scan 3  | Average | I <sub>0</sub> /I |
|-----|------------------|---------|---------|---------|---------|-------------------|
| #1  | 0                | 932.493 | 939.937 | 931.375 | 934.602 | 1.00              |
|     | 0.2              | 889.777 | 883.373 | 886.327 | 886.492 | 1.05              |
|     | 0.4              | 938.378 | 935.504 | 937.100 | 936.994 | 1.00              |
|     | 0.6              | 935.183 | 930.535 | 939.139 | 934.952 | 1.00              |
|     | 0.8              | 939.441 | 942.469 | 945.518 | 942.476 | 0.99              |
| #2  | 0                | 885.978 | 886.403 | 888.521 | 886.967 | 1.00              |
|     | 0.2              | 875.347 | 876.249 | 875.080 | 875.559 | 1.01              |
|     | 0.4              | 872.750 | 870.688 | 871.210 | 871.549 | 1.02              |
|     | 0.6              | 882.858 | 881.669 | 883.245 | 882.591 | 1.00              |
|     | 0.8              | 845.201 | 845.971 | 843.890 | 845.021 | 1.05              |

**Table S.2:** Relevant concentrations and tabulated quenching data for Experiment 2.

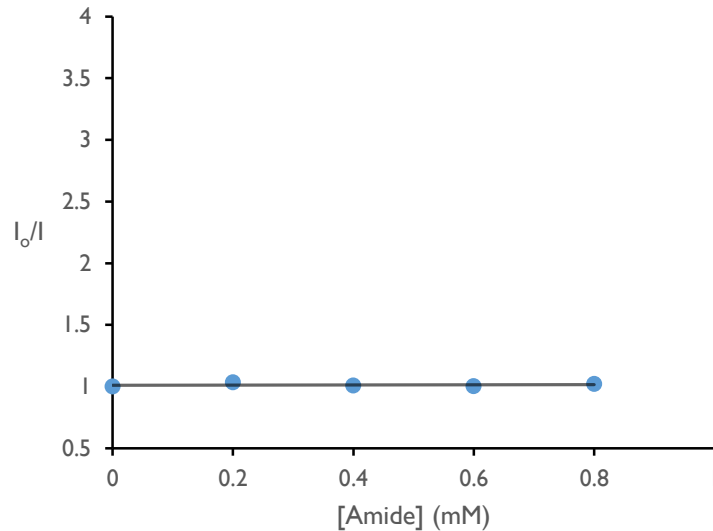

**Figure S.4:** Graphical representation of I<sub>0</sub>/I data collected in Experiment 2

### Experiment 3: Constant Iridium; Varied Base

| Species                                                                        | Concentration (mM) |
|--------------------------------------------------------------------------------|--------------------|
| [Ir(dF(CF <sub>3</sub> )ppy) <sub>2</sub> (bpy)](PF <sub>6</sub> )             | 0.01               |
| Bu <sub>4</sub> N <sup>+</sup> (BuO) <sub>2</sub> PO <sub>2</sub> <sup>-</sup> | Varied             |
| Thiophenol                                                                     | 0                  |
| Acetanilide                                                                    | 0                  |

| Run | [Phosphate] mM | Scan 1  | Scan 2  | Scan 3  | Average  | I <sub>0</sub> /I |
|-----|----------------|---------|---------|---------|----------|-------------------|
| #1  | 0              | 789.752 | 790.186 | 783.810 | 787.916  | 1.00              |
|     | 0.1            | 645.014 | 650.034 | 648.595 | 647.881  | 1.22              |
|     | 0.2            | 635.267 | 634.266 | 638.530 | 636.021  | 1.24              |
|     | 0.3            | 625.919 | 619.749 | 616.262 | 620.643  | 1.27              |
|     | 0.4            | 591.196 | 591.397 | 591.752 | 591.448  | 1.33              |
| #2  | 0              | 791.325 | 790.895 | 799.238 | 793.8193 | 1.00              |
|     | 0.1            | 646.638 | 647.842 | 650.479 | 648.320  | 1.22              |
|     | 0.2            | 657.171 | 657.934 | 659.459 | 658.188  | 1.21              |
|     | 0.3            | 639.828 | 641.645 | 637.997 | 639.823  | 1.24              |
|     | 0.4            | 653.018 | 650.684 | 652.056 | 651.919  | 1.22              |
| #3  | 0              | 846.489 | 862.392 | 848.55  | 852.477  | 1.00              |
|     | 0.1            | 694.675 | 694.147 | 692.492 | 693.771  | 1.23              |
|     | 0.2            | 662.177 | 660.041 | 665.352 | 662.523  | 1.29              |
|     | 0.3            | 635.686 | 632.086 | 637.833 | 635.202  | 1.34              |
|     | 0.4            | 645.087 | 644.287 | 641.960 | 643.778  | 1.32              |

**Table S.3:** Relevant concentrations and tabulated quenching data for Experiment 3.

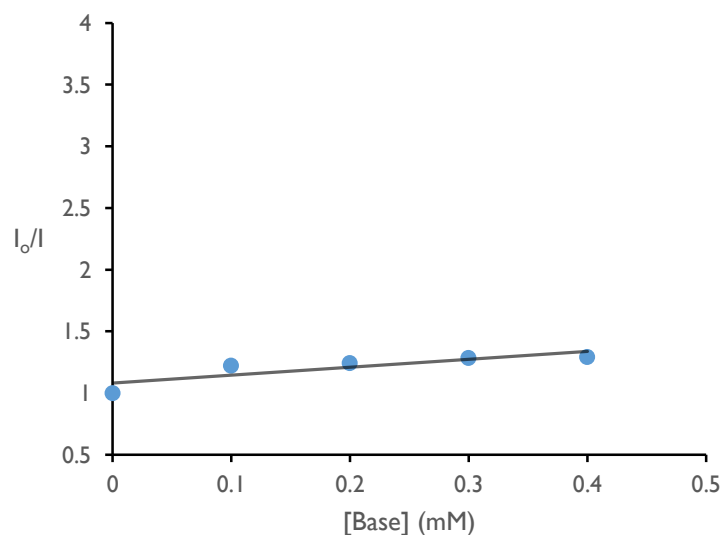

**Figure S.5:** Graphical representation of I<sub>0</sub>/I data collected in Experiment 3; quenching is non-linear, suggesting that the base is not oxidized by the catalyst.

### Experiment 4: Constant Iridium and Base; Varied Thiophenol

| Species                                                                        | Concentration (mM) |
|--------------------------------------------------------------------------------|--------------------|
| [Ir(dF(CF <sub>3</sub> )ppy) <sub>2</sub> (bpy)](PF <sub>6</sub> )             | 0.01               |
| Bu <sub>4</sub> N <sup>+</sup> (BuO) <sub>2</sub> PO <sub>2</sub> <sup>-</sup> | 0.20               |
| Thiophenol                                                                     | Varied             |
| Acetanilide                                                                    | 0                  |

| Run | [PhSH] mM | Scan 1  | Scan 2  | Scan 3  | Average  | I <sub>0</sub> /I |
|-----|-----------|---------|---------|---------|----------|-------------------|
| #1A | 0         | 750.846 | 746.135 | 749.731 | 748.904  | 1.00              |
|     | 0.1       | 632.271 | 627.895 | 627.44  | 629.202  | 1.19              |
|     | 0.2       | 583.432 | 584.378 | 580.102 | 582.637  | 1.29              |
|     | 0.3       | 539.585 | 541.144 | 536.424 | 539.051  | 1.39              |
|     | 0.4       | 520.453 | 515.72  | 518.014 | 518.062  | 1.45              |
| #1B | 0         | 721.309 | 717.858 | 721.456 | 720.208  | 1.00              |
|     | 0.5       | 477.430 | 484.373 | 473.379 | 478.394  | 1.51              |
|     | 1.0       | 421.605 | 419.471 | 422.494 | 421.190  | 1.71              |
|     | 1.5       | 373.433 | 369.575 | 372.084 | 371.697  | 1.94              |
|     | 0.2       | 344.975 | 344.53  | 342.757 | 344.087  | 2.09              |
| #2A | 0         | 717.034 | 719.376 | 713.981 | 716.797  | 1.00              |
|     | 0.1       | 568.158 | 569.11  | 567.99  | 568.419  | 1.26              |
|     | 0.2       | 562.802 | 562.734 | 559.065 | 561.534  | 1.28              |
|     | 0.3       | 548.664 | 550.08  | 549.071 | 549.272  | 1.30              |
|     | 0.4       | 529.005 | 529.171 | 531.934 | 530.037  | 1.35              |
| #2B | 0         | 729.003 | 732.202 | 736.484 | 732.563  | 1.00              |
|     | 0.5       | 481.695 | 476.457 | 477.42  | 478.524  | 1.53              |
|     | 1.0       | 426.193 | 427.499 | 422.245 | 425.3123 | 1.72              |
|     | 1.5       | 369.74  | 366.521 | 364.87  | 367.0437 | 2.00              |
|     | 0.2       | 350.858 | 352.591 | 348.931 | 350.7933 | 2.09              |
| #3A | 0         | 725.107 | 722.44  | 728.595 | 725.381  | 1.00              |
|     | 0.1       | 634.786 | 629.184 | 627.921 | 630.630  | 1.15              |
|     | 0.2       | 568.433 | 569.086 | 536.744 | 558.088  | 1.30              |
|     | 0.3       | 542.675 | 536.744 | 537.692 | 539.037  | 1.35              |
|     | 0.4       | 526.683 | 530.667 | 526.388 | 527.913  | 1.37              |
| #3B | 0         | 769.101 | 771.692 | 765.438 | 768.744  | 1.00              |
|     | 0.5       | 501.615 | 495.85  | 497.561 | 498.342  | 1.54              |
|     | 1.0       | 420.417 | 418.756 | 415.23  | 418.134  | 1.84              |
|     | 1.5       | 406.11  | 403.146 | 402.783 | 404.013  | 1.90              |
|     | 0.2       | 372.305 | 368.086 | 366.569 | 368.987  | 2.08              |

**Table S.4:** Relevant concentrations and tabulated quenching data for Experiment 4.

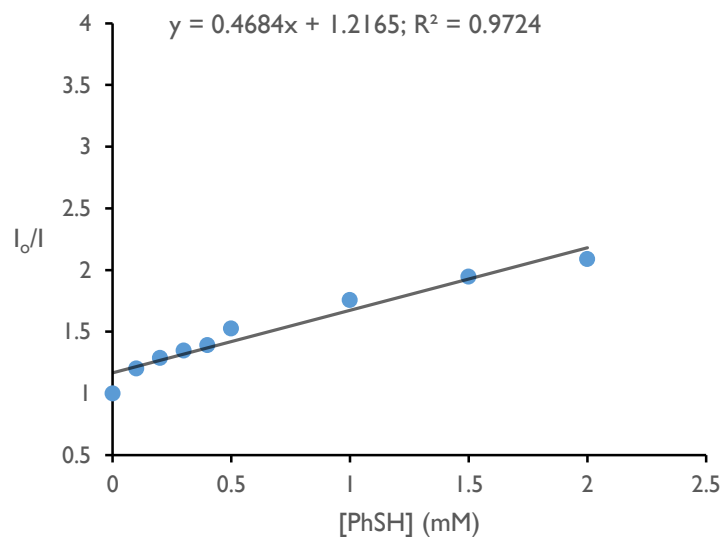

**Figure S.6:** Graphical representation of  $I_0/I$  data collected in Experiment 4. The initial data point where  $[\text{PhSH}] = 0$  is thought to be low due to a) the small magnitude of the slope of quenching and b) background quenching by the phosphate. Because quenching looks to be otherwise linear over an order of magnitude, the trendline generated where the dataset is not forced to have an intercept of 1 (depicted) better reflects the value of  $K_{sv}$  than the trendline forced to have an intercept of 1 ( $K_{sv} = 635$ ,  $R^2 = 0.8263$ ).

### Experiment 5: Constant Iridium and Base; Varied Amide

| Species                                                                        | Concentration (mM) |
|--------------------------------------------------------------------------------|--------------------|
| [Ir(dF(CF <sub>3</sub> )ppy) <sub>2</sub> (bpy)](PF <sub>6</sub> )             | 0.01               |
| Bu <sub>4</sub> N <sup>+</sup> (BuO) <sub>2</sub> PO <sub>2</sub> <sup>-</sup> | 0.20               |
| Thiophenol                                                                     | 0                  |
| Acetanilide                                                                    | Varied             |

| Run | [Phosphate] mM | Scan 1  | Scan 2  | Scan 3  | Average | I <sub>0</sub> /I |
|-----|----------------|---------|---------|---------|---------|-------------------|
| #1  | 0              | 760.612 | 757.777 | 761.875 | 760.088 | 1.00              |
|     | 0.2            | 463.507 | 456.618 | 464.257 | 461.461 | 1.65              |
|     | 0.4            | 345.558 | 343.636 | 346.273 | 345.156 | 2.20              |
|     | 0.6            | 289.813 | 290.840 | 287.861 | 289.505 | 2.63              |
|     | 0.8            | 237.952 | 238.957 | 238.777 | 238.562 | 3.19              |
| #2  | 0              | 757.608 | 758.384 | 754.294 | 756.762 | 1.00              |
|     | 0.2            | 459.608 | 465.354 | 461.501 | 462.154 | 1.64              |
|     | 0.4            | 337.150 | 339.800 | 339.305 | 338.752 | 2.23              |
|     | 0.6            | 267.125 | 266.743 | 266.897 | 266.922 | 2.84              |
|     | 0.8            | 240.492 | 238.997 | 238.813 | 239.434 | 3.16              |
| #3  | 0              | 750.909 | 750.022 | 750.661 | 750.531 | 1.00              |
|     | 0.2            | 461.413 | 463.009 | 461.957 | 462.126 | 1.62              |
|     | 0.4            | 333.101 | 333.275 | 332.121 | 332.832 | 2.25              |
|     | 0.6            | 282.849 | 280.871 | 280.252 | 281.324 | 2.67              |
|     | 0.8            | 225.228 | 222.267 | 221.827 | 223.107 | 3.36              |

**Table S.5:** Relevant concentrations and tabulated quenching data for Experiment 5.

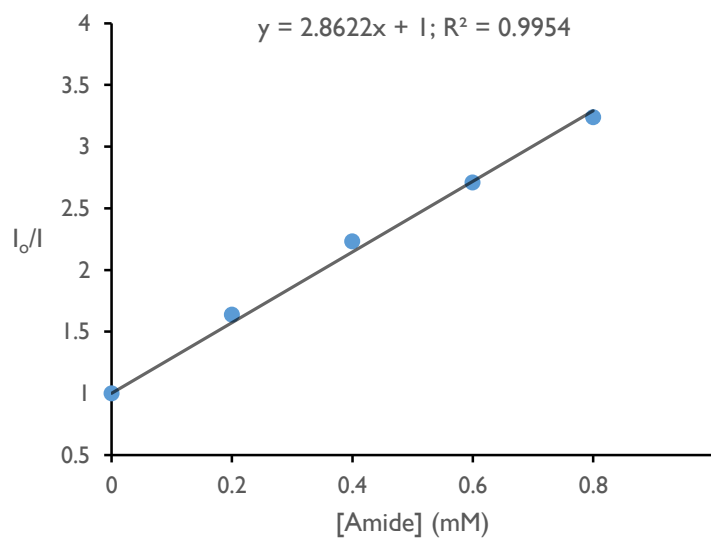

**Figure S.7:** Graphical representation of I<sub>0</sub>/I data collected in Experiment 5.

### Experiment 6: Constant Iridium, Base, and Thiophenol; Varied Amide

| Species                                                                        | Concentration (mM) |
|--------------------------------------------------------------------------------|--------------------|
| [Ir(dF(CF <sub>3</sub> )ppy) <sub>2</sub> (bpy)](PF <sub>6</sub> )             | 0.01               |
| Bu <sub>4</sub> N <sup>+</sup> (BuO) <sub>2</sub> PO <sub>2</sub> <sup>-</sup> | 0.20               |
| Thiophenol                                                                     | 1.00               |
| Acetanilide                                                                    | Varied             |

| Run | [Phosphate] mM | Scan 1  | Scan 2  | Scan 3  | Average | I <sub>0</sub> /I |
|-----|----------------|---------|---------|---------|---------|-------------------|
| #1  | 0              | 388.283 | 391.908 | 385.355 | 388.515 | 1.00              |
|     | 0.1            | 326.134 | 328.565 | 326.391 | 327.030 | 1.19              |
|     | 0.2            | 297.225 | 300.405 | 296.061 | 297.897 | 1.30              |
|     | 0.3            | 279.350 | 277.059 | 280.083 | 278.831 | 1.39              |
|     | 0.4            | 249.284 | 247.949 | 249.566 | 248.933 | 1.56              |
| #2  | 0              | 383.622 | 385.36  | 379.809 | 382.930 | 1.00              |
|     | 0.1            | 338.610 | 333.328 | 336.473 | 336.137 | 1.14              |
|     | 0.2            | 302.227 | 302.875 | 300.110 | 301.737 | 1.27              |
|     | 0.3            | 273.760 | 271.328 | 271.721 | 272.270 | 1.41              |
|     | 0.4            | 250.741 | 249.216 | 249.63  | 249.862 | 1.53              |
| #3  | 0              | 348.581 | 350.308 | 353.135 | 350.675 | 1.00              |
|     | 0.1            | 314.83  | 315.003 | 313.107 | 314.313 | 1.12              |
|     | 0.2            | 291.569 | 293.663 | 293.979 | 293.070 | 1.20              |
|     | 0.3            | 274.320 | 274.791 | 275.559 | 274.890 | 1.28              |
|     | 0.4            | 246.621 | 247.317 | 247.632 | 247.190 | 1.42              |

**Table S.6:** Relevant concentrations and tabulated quenching data for Experiment 6.

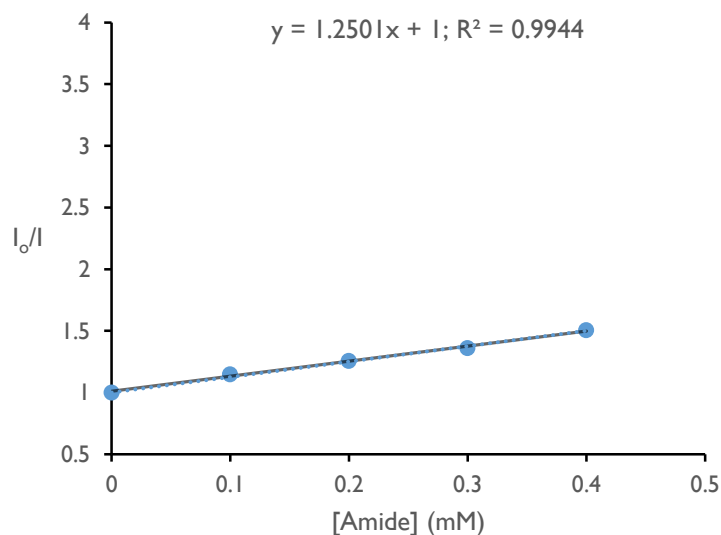

**Figure S.8:** Graphical representation of I<sub>0</sub>/I data collected in Experiment 6.

### Experiment 7: Constant Iridium, Base, and Amide; Varied Thiophenol

| Species                                                                    | Concentration (mM) |
|----------------------------------------------------------------------------|--------------------|
| $[\text{Ir}(\text{dF}(\text{CF}_3)\text{ppy})_2(\text{bpy})](\text{PF}_6)$ | 0.01               |
| $\text{Bu}_4\text{N}^+ (\text{BuO})_2\text{PO}_2^-$                        | 0.20               |
| Thiophenol                                                                 | Varied             |
| Acetanilide                                                                | 1.00               |

| Run | [Phosphate] mM | Scan 1  | Scan 2  | Scan 3  | Average | $I_0/I$ |
|-----|----------------|---------|---------|---------|---------|---------|
| #1  | 0              | 191.923 | 192.143 | 191.378 | 191.815 | 1.00    |
|     | 0.1            | 199.127 | 198.669 | 197.794 | 198.530 | 0.97    |
|     | 0.2            | 194.679 | 196.167 | 198.002 | 196.283 | 0.98    |
|     | 0.3            | 200.583 | 199.419 | 197.359 | 199.120 | 0.96    |
|     | 0.4            | 198.783 | 196.313 | 197.523 | 197.540 | 0.97    |
| #2  | 0              | 194.939 | 197.248 | 192.456 | 194.881 | 1.00    |
|     | 0.1            | 188.002 | 186.639 | 186.622 | 187.088 | 1.04    |
|     | 0.2            | 206.518 | 204.309 | 205.296 | 205.374 | 0.95    |
|     | 0.3            | 200.213 | 199.957 | 199.070 | 199.747 | 0.98    |
|     | 0.4            | 197.970 | 196.815 | 199.029 | 197.938 | 0.98    |
| #3  | 0              | 174.566 | 176.449 | 172.310 | 174.442 | 1.00    |
|     | 0.1            | 176.818 | 177.043 | 175.878 | 176.580 | 0.99    |
|     | 0.2            | 186.852 | 185.928 | 187.492 | 186.757 | 0.93    |
|     | 0.3            | 181.780 | 181.235 | 180.267 | 181.094 | 0.96    |
|     | 0.4            | 185.598 | 185.467 | 184.282 | 185.116 | 0.94    |

**Table S.7:** Relevant concentrations and tabulated quenching data for Experiment 7.

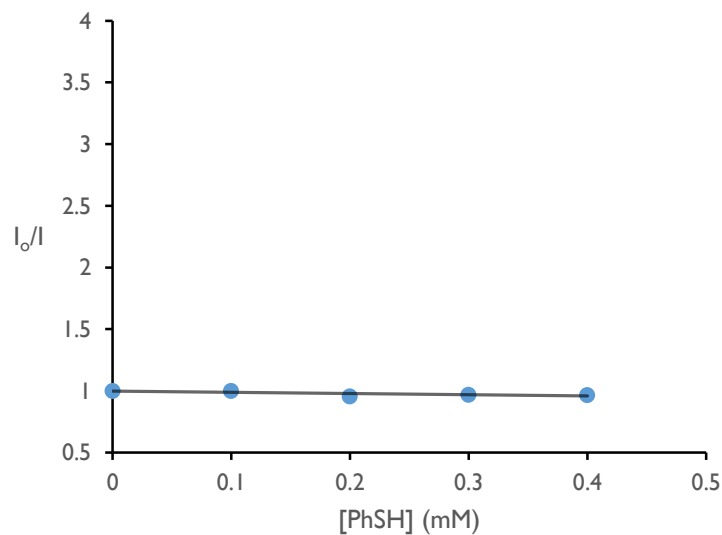

**Figure S.9:** Graphical representation of  $I_0/I$  data collected in Experiment 7.



## Mechanistic Explanation for Luminescence Quenching Experiments 6 and 7

Both acetanilide and thiophenol are competent to quench the excited state of the photocatalyst in the presence of phosphate base. In competition-quenching experiments in which luminescence is observed as a function of a “varied quencher” in the presence of constant concentrations of phosphate and a “background quencher”, the luminescence measured at  $I_o$  reflects some quenching pertinent to the interaction between the base and the background quencher. The luminescence observed does not indicate *absolute* quenching, but rather *relative* quenching of the varied quencher against the background quencher.

When luminescence is observed as a function of the thiophenol concentration in the presence of base *and* acetanilide, the observed quenching  $I$  does not vary relative to the background quenching incorporated into the  $I_o$  luminescence. These results indicate thiophenol-related quenching is inefficient relative to acetanilide-related quenching. When the opposite experiment is run, *i.e.* when acetanilide is varied and thiophenol is held constant in excess, the observed quenching  $I$  demonstrates a clean first-order dependence on the concentration of acetanilide relative to the background quenching  $I_o$ . Taken together, these experiments demonstrate that PCET to the amide is kinetically preferred over PCET to the thiophenol component based on *relative* quenching of the two components.

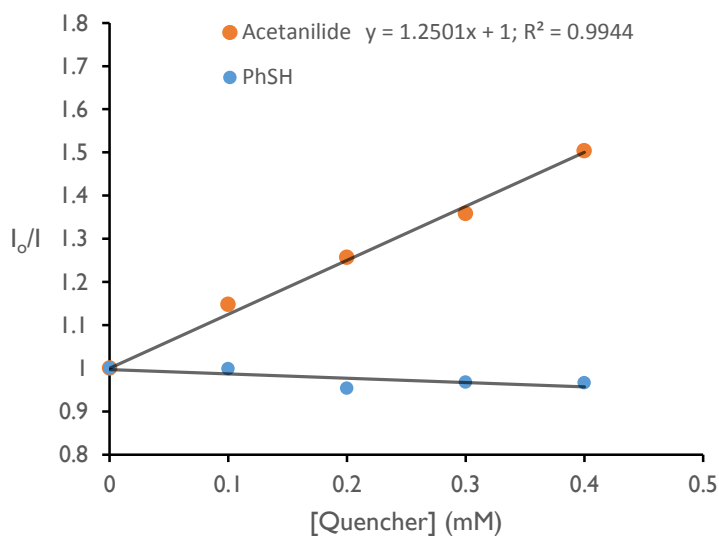

**Figure S.10:** Overlaid graphical representation of  $I_o/I$  data collected in Experiments 6 (red) and 7 (blue).

## Computational Evaluation of Hydrogen Bonding

### Computational Details

All calculations used DFT methodology<sup>30</sup> as implemented in the Gaussian 09 series of computer programs.<sup>31</sup> We employed the restricted  $\omega$ B97XD functional.<sup>32</sup> All-electron, split-valence double- $\zeta$  plus polarization and diffuse functions 6-31G++(2d,2p) basis sets were used.<sup>33</sup> Solvation was modeled using the CPCM polarizable conductor calculation model with the solvent as dichloromethane.<sup>34</sup> All complexes underwent geometry optimization, and stationary points were subjected to normal mode analysis.

**Figure S.11:** Chemical equations for thermodynamic analysis.

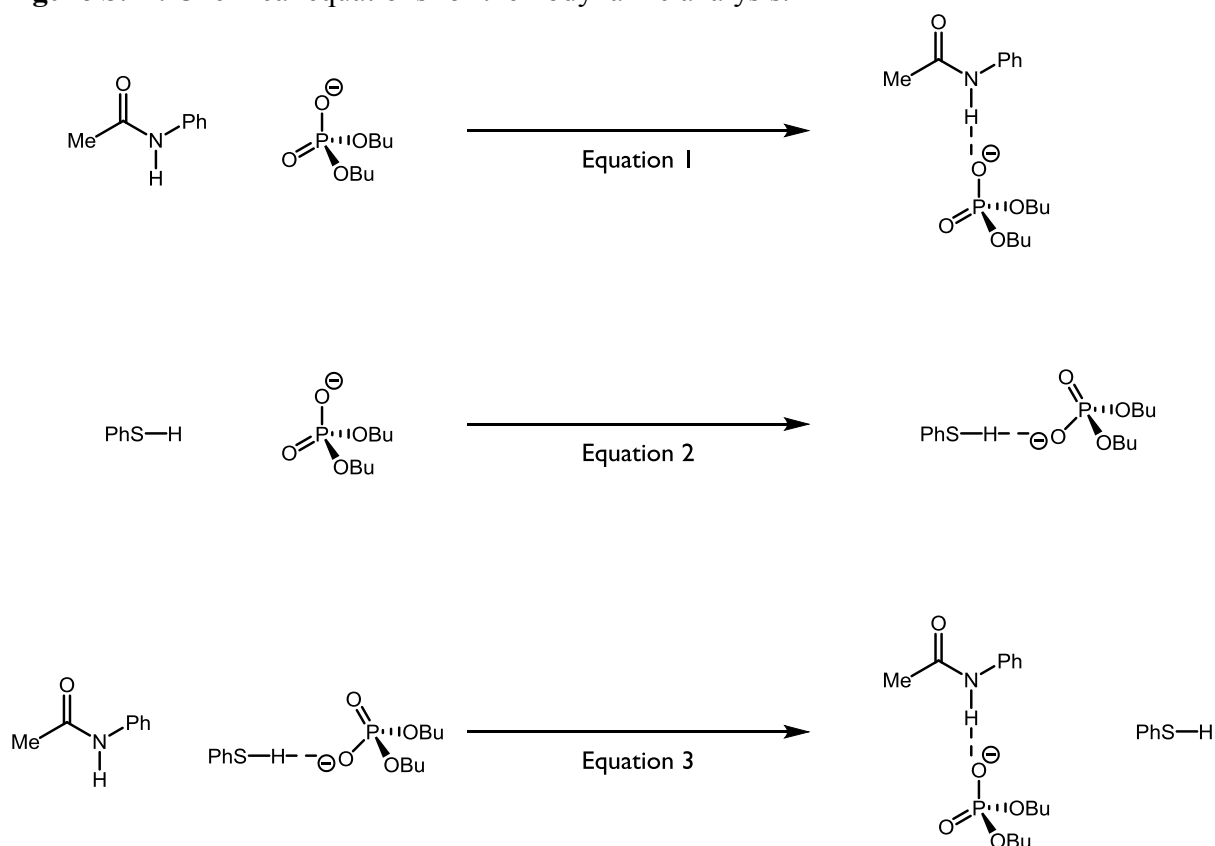

**Table S.8:** Thermodynamic stationary points for hydrogen bonding analysis. Energies are given in hartree and entropy is provided in entropy units.

| Entry | Job Name                                                            | E+ZPE        | G            | H            | S       |
|-------|---------------------------------------------------------------------|--------------|--------------|--------------|---------|
| 1     | acetanilide                                                         | -440.015090  | -440.050801  | -440.005061  | 96.269  |
| 2     | thiophenol                                                          | -630.264668  | -630.295093  | -630.257530  | 79.059  |
| 3     | dibutylphosphate [(BuO) <sub>2</sub> PO <sub>2</sub> <sup>-</sup> ] | -957.804105  | -957.851320  | -957.786766  | 135.865 |
| 4     | acetanilide-dibutylphosphate                                        | -1397.842297 | -1397.901542 | -1397.815008 | 182.126 |
| 5     | thiophenol-dibutylphosphate                                         | -1588.081965 | -1588.137504 | -1588.057556 | 168.264 |

**Table S.9:** Energetic analysis of hydrogen bonding presented in the chemical equations in Figure S.11 using the energy values provided in Table S.8. Energies are given in units of kcal mol<sup>-1</sup>; using the conversion factor 627.51 kcal mol<sup>-1</sup> per hartree and are rounded off after the third decimal place. Entropies are provided in entropy units and are rounded off after the third decimal place.

| Equation | Entries for $\Delta$ | $\Delta E+ZPE$ | $\Delta G$ | $\Delta H$ | $\Delta S$ |
|----------|----------------------|----------------|------------|------------|------------|
| 1        | =(4)-(1+3)           | -8.278         | 5.590      | -8.321     | -46.660    |
| 2        | =(5)-(2+3)           | -14.497        | 0.363      | -14.546    | -50.008    |
| 3        | =(4+2)-(5+1)         | -6.219         | -5.227     | -6.226     | -3.348     |

## Optimized Geometries

Optimized geometries in Cartesian coordinates (Å) and energies (hartree) for stationary points.

### Acetanilide (Entry 1)

```

E (rwB97XD) -440.171509
Zero-point correction= 0.156418
Thermal correction to Energy= 0.165503
Thermal correction to Enthalpy= 0.166448
Thermal correction to Gibbs Free Energy= 0.120707
Sum of electronic and zero-point Energies= -440.015090
Sum of electronic and thermal Energies= -440.006005
Sum of electronic and thermal Enthalpies= -440.005061
Sum of electronic and thermal Free Energies= -440.050801

```

Charge = 0; Multiplicity = 1

```

C 2.17075300 0.16136900 -0.01847000
O 2.12627000 1.38269300 -0.03179100
N 1.06359800 -0.63679800 -0.02033000
H 1.24156400 -1.62901500 -0.01365900
C 3.48268500 -0.58933600 0.03652100
H 3.74659000 -0.75356400 1.08448800
H 3.43684400 -1.55896700 -0.46140500
H 4.25705200 0.02268100 -0.42227900
C -0.29847100 -0.28054200 -0.00982100
C -0.75465800 1.04043400 0.00551600
C -1.22756400 -1.32813900 -0.01373100
C -2.12491800 1.29184700 0.01747000
H -0.04589600 1.85336700 0.00768900
C -2.58919600 -1.06204700 -0.00174000
H -0.87894200 -2.35556200 -0.02615100
C -3.04885400 0.25328600 0.01405500
H -2.46707100 2.32026500 0.02991300
H -3.29253000 -1.88625700 -0.00464300
H -4.11162000 0.46186600 0.02389500

```

### Thiophenol (Entry 2)

```

E (rwB97XD) -630.365038
Zero-point correction= 0.100370
Thermal correction to Energy= 0.106564
Thermal correction to Enthalpy= 0.107509
Thermal correction to Gibbs Free Energy= 0.069945

```

|                                              |             |
|----------------------------------------------|-------------|
| Sum of electronic and zero-point Energies=   | -630.264668 |
| Sum of electronic and thermal Energies=      | -630.258474 |
| Sum of electronic and thermal Enthalpies=    | -630.257530 |
| Sum of electronic and thermal Free Energies= | -630.295093 |

Charge = 0; Multiplicity = 1

|   |             |             |             |
|---|-------------|-------------|-------------|
| C | -0.19130600 | 1.20831100  | -0.00001000 |
| C | 0.50570500  | -0.00075200 | 0.00004800  |
| C | -0.19914200 | -1.20654000 | 0.00003900  |
| C | -1.59023100 | -1.19844500 | -0.00005900 |
| C | -2.28922600 | 0.00581400  | -0.00009700 |
| C | -1.58329100 | 1.20557900  | -0.00005000 |
| H | 0.34289400  | 2.15124200  | -0.00002000 |
| H | 0.33433000  | -2.15045600 | 0.00011200  |
| H | -2.12618000 | -2.14015200 | -0.00008200 |
| H | -3.37234300 | 0.00907900  | -0.00015300 |
| H | -2.11404600 | 2.15029000  | -0.00007200 |
| S | 2.28152400  | -0.08369800 | 0.00002000  |
| H | 2.51590300  | 1.23536300  | 0.00067700  |

### Dibutyl Phosphate [(BuO)<sub>2</sub>PO<sub>2</sub>] (Entry 3)

|                                              |             |
|----------------------------------------------|-------------|
| E(rwB97XD)                                   | -958.069916 |
| Zero-point correction=                       | 0.265811    |
| Thermal correction to Energy=                | 0.282206    |
| Thermal correction to Enthalpy=              | 0.283151    |
| Thermal correction to Gibbs Free Energy=     | 0.218597    |
| Sum of electronic and zero-point Energies=   | -957.804105 |
| Sum of electronic and thermal Energies=      | -957.787710 |
| Sum of electronic and thermal Enthalpies=    | -957.786766 |
| Sum of electronic and thermal Free Energies= | -957.851320 |

Charge = -1; Multiplicity = 1

|   |             |             |             |
|---|-------------|-------------|-------------|
| P | 0.00137900  | -1.62201100 | 0.01175300  |
| O | 0.01350100  | -1.86107900 | 1.48731800  |
| O | 0.29826500  | -2.73168200 | -0.93880500 |
| O | -1.41155700 | -0.98212600 | -0.45896500 |
| O | 0.94174000  | -0.32643000 | -0.32631400 |
| C | -1.98646300 | 0.07369600  | 0.30265400  |
| C | -3.31081500 | 0.46906000  | -0.32433700 |
| H | -1.30162400 | 0.93006300  | 0.31466200  |
| H | -2.13247600 | -0.25707600 | 1.33659300  |
| C | -3.97698800 | 1.62695100  | 0.41729000  |
| H | -3.14022400 | 0.74871900  | -1.37015200 |
| H | -3.97821000 | -0.40030000 | -0.33118100 |
| C | -5.30870900 | 2.03651200  | -0.20892600 |
| H | -4.13583200 | 1.34672900  | 1.46490600  |
| H | -3.29801100 | 2.48743600  | 0.42756200  |
| H | -5.76072000 | 2.87518700  | 0.32672100  |
| H | -5.17222500 | 2.33855800  | -1.25185200 |
| H | -6.02093100 | 1.20589100  | -0.19438600 |
| C | 2.29974800  | -0.35278800 | 0.08596000  |
| C | 2.93505200  | 0.99325500  | -0.21336400 |
| H | 2.83393000  | -1.15000200 | -0.44731400 |
| H | 2.35726600  | -0.56823900 | 1.15947800  |
| C | 4.40809600  | 1.04147300  | 0.18947500  |
| H | 2.83618500  | 1.20367600  | -1.28439500 |
| H | 2.37934200  | 1.77415800  | 0.31854800  |
| C | 5.05252100  | 2.39523600  | -0.10334600 |
| H | 4.50087700  | 0.81713600  | 1.25831300  |
| H | 4.95534800  | 0.25332100  | -0.34041800 |
| H | 6.10579200  | 2.40744200  | 0.18866800  |
| H | 4.99711200  | 2.63048700  | -1.17065600 |
| H | 4.54346900  | 3.19713800  | 0.44031600  |

## Acetanilide-Dibutylphosphate (Entry 4)

|                                              |              |
|----------------------------------------------|--------------|
| E(rwB97XD)                                   | -1398.267406 |
| Zero-point correction=                       | 0.425109     |
| Thermal correction to Energy=                | 0.451453     |
| Thermal correction to Enthalpy=              | 0.452398     |
| Thermal correction to Gibbs Free Energy=     | 0.365864     |
| Sum of electronic and zero-point Energies=   | -1397.842297 |
| Sum of electronic and thermal Energies=      | -1397.815952 |
| Sum of electronic and thermal Enthalpies=    | -1397.815008 |
| Sum of electronic and thermal Free Energies= | -1397.901542 |

Charge = -1; Multiplicity = 1

|   |             |             |             |
|---|-------------|-------------|-------------|
| P | -2.42172800 | 1.06403400  | 0.91305900  |
| O | -3.34156200 | 2.10472800  | 1.44252200  |
| O | -3.36650300 | -0.16620200 | 0.44373500  |
| O | -1.63289100 | 0.33522500  | 2.13360000  |
| C | -2.77527100 | -1.34614800 | -0.09115000 |
| C | -2.63674200 | -1.29294800 | -1.60456500 |
| H | -3.42926000 | -2.17327900 | 0.19976500  |
| H | -1.80065500 | -1.52286500 | 0.38014100  |
| C | -2.03468000 | -2.57938000 | -2.16771400 |
| H | -3.62390300 | -1.12061300 | -2.04777700 |
| H | -2.01136700 | -0.43514000 | -1.87192200 |
| C | -1.83449000 | -2.51840900 | -3.68037000 |
| H | -1.07018200 | -2.77199300 | -1.68341100 |
| H | -2.68054000 | -3.42797300 | -1.91395100 |
| H | -1.40898700 | -3.44864900 | -4.06537900 |
| H | -2.78527700 | -2.34540500 | -4.19354600 |
| H | -1.15658500 | -1.70269100 | -3.94967700 |
| C | -0.23431600 | 0.47780900  | 2.34938100  |
| C | 0.37585200  | -0.87317800 | 2.67869700  |
| H | -0.07923400 | 1.18002600  | 3.17632300  |
| H | 0.23949900  | 0.89775300  | 1.45893200  |
| C | 1.89318400  | -0.79685500 | 2.83579300  |
| H | -0.07874200 | -1.26483000 | 3.59598300  |
| H | 0.12922800  | -1.57498900 | 1.87407000  |
| C | 2.51678500  | -2.15193000 | 3.16118500  |
| H | 2.33053000  | -0.41141000 | 1.90754300  |
| H | 2.14457400  | -0.07710500 | 3.62361600  |
| H | 3.60246000  | -2.07486100 | 3.26263600  |
| H | 2.11850200  | -2.55514800 | 4.09773900  |
| H | 2.30481500  | -2.87491400 | 2.36765500  |
| O | -1.44008100 | 1.40609800  | -0.16986000 |
| H | 0.21122300  | 1.51956800  | -0.71953700 |
| N | 1.20665800  | 1.56082500  | -0.97840100 |
| C | 1.69078400  | 2.77167300  | -1.35239000 |
| C | 1.89464900  | 0.33966900  | -0.88899800 |
| O | 2.85313200  | 2.97855600  | -1.69048400 |
| C | 0.66688600  | 3.88550600  | -1.34951000 |
| C | 3.28799000  | 0.22335700  | -0.86632100 |
| C | 1.11049400  | -0.81493400 | -0.76980100 |
| H | 0.45401200  | 4.15682600  | -2.38641300 |
| H | -0.26442400 | 3.60418800  | -0.85714300 |
| H | 1.10109900  | 4.75762300  | -0.85940600 |
| C | 3.87134000  | -1.03340600 | -0.72053200 |
| H | 3.90106800  | 1.10689000  | -0.95525700 |
| C | 1.70442300  | -2.05911000 | -0.62105000 |
| H | 0.03104700  | -0.71304300 | -0.77330800 |
| C | 3.09207400  | -2.17871700 | -0.59630000 |
| H | 4.95246500  | -1.11096900 | -0.69826800 |
| H | 1.07999100  | -2.93920600 | -0.51543200 |
| H | 3.55742100  | -3.14931700 | -0.47528800 |

## Thiophenol-Dibutylphosphate (Entry 5)

|                                              |              |
|----------------------------------------------|--------------|
| E(rwB97XD)                                   | -1588.450856 |
| Zero-point correction=                       | 0.368891     |
| Thermal correction to Energy=                | 0.392355     |
| Thermal correction to Enthalpy=              | 0.393299     |
| Thermal correction to Gibbs Free Energy=     | 0.313352     |
| Sum of electronic and zero-point Energies=   | -1588.081965 |
| Sum of electronic and thermal Energies=      | -1588.058500 |
| Sum of electronic and thermal Enthalpies=    | -1588.057556 |
| Sum of electronic and thermal Free Energies= | -1588.137504 |

Charge = -1; Multiplicity = 1

|   |             |             |             |
|---|-------------|-------------|-------------|
| P | 1.19687100  | -0.62066100 | 0.23174400  |
| O | 1.08077400  | -0.44443600 | 1.70951200  |
| O | 0.14227300  | 0.30484700  | -0.56294800 |
| O | 2.56643100  | 0.08847500  | -0.29677000 |
| C | -0.32123900 | 1.52977000  | -0.00602600 |
| C | -1.55627700 | 1.97293900  | -0.76755700 |
| H | 0.47018800  | 2.28664100  | -0.07282300 |
| H | -0.56013300 | 1.37874700  | 1.05098700  |
| C | -2.19698600 | 3.21468600  | -0.15187700 |
| H | -1.29265000 | 2.16743100  | -1.81355800 |
| H | -2.27895400 | 1.15072900  | -0.76423900 |
| C | -3.47428000 | 3.63038500  | -0.87838400 |
| H | -2.42697200 | 3.01270500  | 0.90088400  |
| H | -1.47962200 | 4.04364200  | -0.16061300 |
| H | -3.91784300 | 4.52305200  | -0.42970700 |
| H | -3.27380600 | 3.84764300  | -1.93214300 |
| H | -4.21765300 | 2.82804700  | -0.83954000 |
| C | 3.80715100  | -0.42687000 | 0.16949700  |
| C | 4.92367900  | 0.51549900  | -0.24180700 |
| H | 3.97242600  | -1.42274800 | -0.25989200 |
| H | 3.78072800  | -0.52840200 | 1.26108100  |
| C | 6.29689800  | 0.00430600  | 0.19183700  |
| H | 4.90096700  | 0.64342300  | -1.33002300 |
| H | 4.73821200  | 1.50070000  | 0.20092500  |
| C | 7.42839800  | 0.95547900  | -0.19338500 |
| H | 6.30160000  | -0.14765000 | 1.27733300  |
| H | 6.47590700  | -0.97850300 | -0.25896600 |
| H | 8.39911000  | 0.56649600  | 0.12459000  |
| H | 7.46467100  | 1.10389600  | -1.27695600 |
| H | 7.29035500  | 1.93594500  | 0.27253900  |
| O | 1.07450500  | -1.98957700 | -0.36708800 |
| H | -0.73051800 | -2.47128200 | -0.70057000 |
| S | -2.00510200 | -2.82725900 | -1.04754400 |
| C | -2.86844700 | -1.58145400 | -0.11691800 |
| C | -4.09464400 | -1.11406600 | -0.59488900 |
| C | -2.35846700 | -1.07198800 | 1.07915000  |
| C | -4.79737400 | -0.14176400 | 0.11203700  |
| H | -4.49306100 | -1.49805300 | -1.52723200 |
| C | -3.05891500 | -0.09011500 | 1.77126900  |
| H | -1.40263800 | -1.41633700 | 1.45609600  |
| C | -4.27989500 | 0.38021000  | 1.29387000  |
| H | -5.74321800 | 0.21929100  | -0.27528900 |
| H | -2.63989600 | 0.31352200  | 2.68590300  |
| H | -4.81810300 | 1.15053100  | 1.83320500  |

## References

1. Perrin, D. D.; Armarego, W. L. F., *Purification of Laboratory Chemicals*. 4th ed.; Butterworth-Heinemann: Oxford, 1997.
2. Pangborn, A. B.; Giardello, M. A.; Grubbs, R. H.; Rosen, R. K.; Timmers, F. J., *Organometallics* **1996**, *15* (5), 1518-1520.
3. Still, W. C.; Kahn, M.; Mitra, A., *J. Org. Chem.* **1978**, *43* (14), 2923-2925.
4. Choi, G. J.; Knowles, R. R., *J. Am. Chem. Soc.* **2015**, *137* (29), 9226-9.
5. Manzoni, M. R.; Zabawa, T. P.; Kasi, D.; Chemler, S. R., *Organometallics* **2004**, *23* (23), 5618-5621.
6. Musacchio, A. J.; Nguyen, L. Q.; Beard, G. H.; Knowles, R. R., *J. Am. Chem. Soc.* **2014**, *136* (35), 12217-20.
7. Cocker, W.; Geraghty, N. W. A.; McMurry, T. B. H.; Shannon, P. V. R., *J. Chem. Soc., Perkin Trans. 1*, **1984**, 2245.
8. Schlummer, B.; Hartwig, J. F., *Org. Lett.* **2002**, *4* (9), 1471-1474.
9. Adachi, Y.; Kamei, N.; Yokoshima, S.; Fukuyama, T., *Org Lett* **2011**, *13* (16), 4446-9.
10. Li, Z.; Song, L.; Li, C., *J. Am. Chem. Soc.* **2013**, *135* (12), 4640-3.
11. Yip, K. T.; Yang, D., *Org Lett* **2011**, *13* (8), 2134-7.
12. Vyas, D. J.; Oestreich, M., *Chem. Commun.* **2010**, *46* (4), 568-70.
13. Hatano, M.; Kamiya, S.; Moriyama, K.; Ishihara, K., *Org Lett* **2011**, *13* (3), 430-3.
14. Candito, D. A.; Dobrovolsky, D.; Lautens, M., *J. Am. Chem. Soc.* **2012**, *134* (37), 15572-80.
15. Nicolaou, K. C.; Baran, P. S.; Zhong, Y. L.; Sugita, K., *J. Am. Chem. Soc.* **2002**, *124* (10), 2212-2220.
16. Elamparuthi, E.; Fellay, C.; Neuburger, M.; Gademann, K., *Angew. Chem. Int. Ed.* **2012**, *51* (17), 4071-3.
17. (a) Rico, R.; Bermejo, F., *Tet. Lett.* **1995**, *36* (43), 7889-7892; (b) Isobe, M.; Niyomchon, S.; Cheng, C.-Y.; Hasakunpaisarn, A., *Tet. Lett.* **2011**, *52* (16), 1847-1850; (c) Fernández-Mateos, A.; Herrero Teijón, P.; Rubio González, R., *Tetrahedron* **2013**, *69* (5), 1611-1616.
18. Peris, G.; Jakobsche, C. E.; Miller, S. J., *J. Am. Chem. Soc.* **2007**, *129* (28), 8710-1.
19. Ryu, D. H.; Zhou, G.; Corey, E. J., *Org Lett* **2005**, *7* (8), 1633-6.
20. Shishido, K.; Hiroya, K.; Fukumoto, K.; Kametani, T., *Tet. Lett.* **1986**, *27* (10), 1167-1170.
21. Kreiser, W.; Below, P.; Ernst, L., *Liebigs Annalen der Chemie* **1985**, *1985* (1), 194-202.
22. Heseck, D.; Lee, M.; Zhang, W.; Noll, B. C.; Mobashery, S., *J. Am. Chem. Soc.* **2009**, *131* (14), 5187-93.
23. Bramwell, A. F.; Crombie, L.; Hemesley, P.; Pattenden, G.; Elliott, M.; Janes, N. F., *Tetrahedron* **1969**, *25* (8), 1727-1741.
24. MacNevin, C. J.; Atif, F.; Sayeed, I.; Stein, D. G.; Liotta, D. C., *J. Med. Chem.* **2009**, *52* (19), 6012-23.
25. Annand, J. R.; Bruno, P. A.; Mapp, A. K.; Schindler, C. S., *Chem. Commun.* **2015**, *51* (43), 8990-3.
26. Tellitu, I.; Urrejola, A.; Serna, S.; Moreno, I.; Herrero, M. T.; Domínguez, E.; SanMartín, R.; Correa, A., *Eur. J. Org. Chem.* **2007**, *2007* (3), 437-444.
27. Hanss, D.; Freys, J. C.; Bernardinelli, G.; Wenger, O. S., *Eur. J. Inorg. Chem.* **2009**, *2009* (32), 4850-4859.
28. Nicolaou, K. C.; Baran, P. S.; Zhong, Y. L.; Barluenga, S.; Hunt, K. W.; Kranich, R.; Vega, J. A., *J. Am. Chem. Soc.* **2002**, *124* (10), 2233-2244.
29. Mahy, W.; Plucinski, P. K.; Frost, C. G., *Org Lett* **2014**, *16* (19), 5020-3.
30. Parr, R. G. Y., W., *Density-Functional Theory of Atoms and Molecules*. University Press: Oxford, 1989.
31. Frisch, M. J. T., G. W.; Schlegel, H. B.; Scuseria, G. E.; Robb, M. A.; Cheeseman, J. R.; Scalmani, G.; Barone, V.; Mennucci, B.; Petersson, G. A.; Nakatsuji, H.; Caricato, M.; Li, X.; Hratchian, H. P.; Izmaylov, A. F.; Bloino, J.; Zheng, G.; Sonnenberg, J. L.; Hada, M.; Ehara, M.; Toyota, K.; Fukuda, R.; Hasegawa, J.; Ishida, M.; Nakajima, T.; Honda, Y.; Kitao, O.; Nakai, H.; Vreven, T.; Montgomery, Jr., J. A.; Peralta, J. E.; Ogliaro, F.; Bearpark, M.; Heyd, J. J.; Brothers, E.; Kudin, K. N.; Staroverov, V. N.; Keith, T.; Kobayashi, R.; Normand, J.; Raghavachari, K.; Rendell, A.; Burant, J. C.; Iyengar, S. S.; Tomasi, J.; Cossi, M.; Rega, N.; Millam, N. J.; Klene, M.; Knox, J. E.; Cross, J. B.; Bakken, V.; Adamo, C.; Jaramillo, J.; Gomperts, R.; Stratmann, R. E.; Yazyev, O.; Austin, A. J.; Cammi, R.; Pomelli, C.; Ochterski, J. W.; Martin, R. L.; Morokuma, K.; Zakrzewski, V. G.; Voth, G. A.; Salvador, P.; Dannenberg, J. J.; Dapprich, S.; Daniels, A. D.; Farkas, Ö.; Foresman, J. B.; Ortiz, J. V.; Cioslowski, J.; Fox, D. J., *Gaussian 09, Revision C.01*. Gaussian, Inc., Wallingford, CT.
32. Chai, J. D.; Head-Gordon, M., *Phys. Chem. Chem. Phys.* **2008**, *10* (44), 6615-20.

33. (a) Ditchfield, R. H., W.J.; Pople, J.A., *J. Chem. Phys.* **1971**, *54* (2), 724; (b) Hehre, W. J. D., R.; Pople, J.A., *J. Chem. Phys.* **1972**, *56* (5), 2257; (c) Hariharan, P. C.; Pople, J. A., *Theor. Chem. Acc.* **1973**, *28* (3), 213-222; (d) Hariharan, P. C.; Pople, J. A., *Mol. Phys.* **1974**, *27* (1), 209-214; (e) Gordon, M. S., *Chem. Phys. Lett.* **1980**, *76* (1), 163-168; (f) Francl, M. M. P., W.J.; Hehre, W.J.; Binkley, J.S.; DeFrees, D.J.; Pople, J.A.; Gordon, M.S., *J. Chem. Phys.* **1982**, *77* (7), 3654; (g) Binning, R. C.; Curtiss, L. A., *J. Comp. Chem.* **1990**, *11* (10), 1206-1216; (h) Blaudeau, J.-P.; McGrath, M. P.; Curtiss, L. A.; Radom, L., *J. Chem. Phys.* **1997**, *107* (13), 5016; (i) Rassolov, V. A.; Pople, J. A.; Ratner, M. A.; Windus, T. L., *J. Chem. Phys.* **1998**, *109* (4), 1223; (j) Rassolov, V. A.; Ratner, M. A.; Pople, J. A.; Redfern, P. C.; Curtiss, L. A., *J. Comp. Chem.* **2001**, *22* (9), 976-984; (k) Clark, T.; Chandrasekhar, J.; Spitznagel, G. W.; Schleyer, P. V. R., *J. Comp. Chem.* **1983**, *4* (3), 294-301; (l) Frisch, M. J.; Pople, J. A.; Binkley, J. S., *J. Chem. Phys.* **1984**, *80* (7), 3265.
34. (a) Barone, V.; Cossi, M., *J. Phys. Chem. A* **1998**, *102* (11), 1995-2001; (b) Cossi, M.; Rega, N.; Scalmani, G.; Barone, V., *J Comput Chem* **2003**, *24* (6), 669-81.
